# Supplementary material for: Gender differences in longevity in free-living older adults who eat-with-others: a prospective study in Taiwan
Source: PubMed Central journal article supplement — BMJ Open. 2017 Sep 18;7(9):e016575. doi: 10.1136/bmjopen-2017-016575 (PMC5623554; doi:10.1136/bmjopen-2017-016575), 2017-09-18
Supplement: bmjopen-2017-016575.draft_revisions.pdf [file bmjopen-2017-016575.draft_revisions.pdf]

# BMJ Open

BMJ Open is committed to open peer review. As part of this commitment we make the peer review history of every article we publish publicly available.

When an article is published we post the peer reviewers' comments and the authors' responses online. We also post the versions of the paper that were used during peer review. These are the versions that the peer review comments apply to.

The versions of the paper that follow are the versions that were submitted during the peer review process. They are not the versions of record or the final published versions. They should not be cited or distributed as the published version of this manuscript.

BMJ Open is an open access journal and the full, final, typeset and author-corrected version of record of the manuscript is available on our site with no access controls, subscription charges or pay-per-view fees (<http://bmjopen.bmj.com>).

If you have any questions on BMJ Open's open peer review process please email [editorial.bmjopen@bmj.com](mailto:editorial.bmjopen@bmj.com)

# BMJ Open

## Gender differences in longevity in free-living older adults who eat-with-others: a prospective study

|                                 |                                                                                                                                                                                                                                                                                                                                                                                                                                                                                                                                                                          |
|---------------------------------|--------------------------------------------------------------------------------------------------------------------------------------------------------------------------------------------------------------------------------------------------------------------------------------------------------------------------------------------------------------------------------------------------------------------------------------------------------------------------------------------------------------------------------------------------------------------------|
| Journal:                        | <i>BMJ Open</i>                                                                                                                                                                                                                                                                                                                                                                                                                                                                                                                                                          |
| Manuscript ID                   | bmjopen-2017-016575                                                                                                                                                                                                                                                                                                                                                                                                                                                                                                                                                      |
| Article Type:                   | Research                                                                                                                                                                                                                                                                                                                                                                                                                                                                                                                                                                 |
| Date Submitted by the Author:   | 24-Feb-2017                                                                                                                                                                                                                                                                                                                                                                                                                                                                                                                                                              |
| Complete List of Authors:       | Huang, Yi-Chen; National Defense Medical Center, Graduate Institute of Life Sciences<br>Cheng, Hsing-Ling ; Tri-Service General Hospital, The Department of Food and Nutrition<br>Wahlqvist, Mark; National Defense Medical Center, School of Public Health; National Health Research Institutes, Institute of Population Health Sciences<br>Lo, Yuan-Ting; National Defense Medical Center, School of Public Health<br>Lee, Meei-Shyuan; National Defense Medical Center, School of Public Health; National Defense Medical Center, Graduate Institute of Life Sciences |
| <b>Primary Subject Heading</b>: | Public health                                                                                                                                                                                                                                                                                                                                                                                                                                                                                                                                                            |
| Secondary Subject Heading:      | Nutrition and metabolism, Epidemiology, Geriatric medicine, Health policy                                                                                                                                                                                                                                                                                                                                                                                                                                                                                                |
| Keywords:                       | elderly, diet, mortality, social activities                                                                                                                                                                                                                                                                                                                                                                                                                                                                                                                              |
|                                 |                                                                                                                                                                                                                                                                                                                                                                                                                                                                                                                                                                          |

SCHOLARONE™  
Manuscripts

Only

## TITLE PAGE

**Gender differences in longevity in free-living older adults who  
eat-with-others: a prospective study**

Yi-Chen Huang<sup>1</sup>, Hsing-Ling Cheng<sup>2</sup>, Mark L Wahlqvist<sup>3,4,5</sup>, Yuan-Ting C Lo<sup>3</sup>, Meei-Shyuan Lee<sup>1,3,4\*</sup>

<sup>1</sup>Graduate Institute of Life Sciences, National Defense Medical Center, 161 Minchuan East Road, Sec. 6, Taipei, Taiwan 11490, Yi-Chen Huang Postdoctoral fellow, Meei-Shyuan Lee Professor

<sup>2</sup>The Department of Food and Nutrition, Tri-Service General Hospital, No. 325, Sec. 2, Chenggong Road, Neihu District, Taipei, Taiwan 11490, Taiwan, Hsing-Ling Cheng Dietitian

<sup>3</sup>School of Public Health, National Defense Medical Center, 161 Minchuan East Road, Sec. 6, Taipei, Taiwan 11490, Mark L Wahlqvist Professor, Yuan-Ting C Lo Postdoctoral fellow, Meei-Shyuan Lee Professor

<sup>4</sup>Institute of Population Health Sciences, National Health Research Institutes, No. 5 Keyan Road, Miaoli County, Taiwan 350, Mark L Wahlqvist Professor

<sup>5</sup>Monash Asia Institute, Monash University, Caulfield, VIC 3800, Australia, Mark L Wahlqvist Professor, Meei-Shyuan Lee Professor

**\*Correspondence to:** Prof Meei-Shyuan Lee, School of Public Health, National Defense Medical Center, 161 Minchuan East Road, Sec. 6, Taipei, Taiwan 11490.

Email: mmsl@ndmctsgh.edu.tw; meeishyuan@gmail.com

Phone and fax number: +886-2-87910704

Word count: 2831 words (excluding title page, licence statement, abstract, references, figures and tables)

## ABSTRACT

**Objectives:** Social activities such as ‘eating-with-others’ can positively affect the ageing process. We investigated the gender-specific association between eating arrangements and risk of all-cause mortality among free-living older adults.

**Setting:** A representative sample from the elderly Nutrition and Health Survey in Taiwan during 1999-2000.

**Participants:** Some 1,894 participants (955 men and 939 women) who aged  $\geq 65$  and completed eating arrangement question as well as confirmed survivorship information.

**Primary and secondary outcome measures:** Eating arrangements, health condition, and 24-hour dietary recall information were collected at baseline. We classified eating arrangements as the daily frequency of eating-with-others (0–3). Survivorship was determined by the National Death Registry until the end of 2008. Cox proportional-hazards regression was used to assess the association between eating-with-others and mortality risk.

**Results:** Overall, 63.1% of men and 56.4% of women ate with others 3 times a day. Both men and women who ate with others were more likely to have higher meat and vegetable intakes, and greater dietary quality than those who ate alone. The hazard ratios (HRs) (95% CI) for all-cause mortality when eating-with-others 2 and 3 times daily were 0.46 (0.28–0.61), 0.67 (0.52–0.88) in men and 0.68 (0.42–1.11), 0.86 (0.64–1.16) in women, compared with those who ate alone. Multivariable HRs (95% CI) were 0.43 (0.25–0.73), 0.63 (0.41–0.98) in men and 0.68 (0.35–1.30), 0.69 (0.39–1.21) in women. With further adjustment for financial status, HR was reduced by 54% in men who ate with others twice a day. Pathway analysis shows this to be dependent on improved dietary quality by eating-with-others.

**Conclusions:** Eating-with-others is an independent survival factor in older men. To providing a social environment which encourages eating-with-others may benefit survival of older people, especially for men.

1  
2  
3  
4 **Key words:** elderly, diet, mortality, social activities  
5  
6  
7

8 **STRENGTHS AND LIMITATIONS OF THIS STUDY**  
9

- 10 ● Use of a representative free-living Taiwanese cohort with 10 years' follow-up for  
11 survival.  
12  
13 ● Study design provided an understanding of eating arrangements for older adults in a  
14 community setting.  
15  
16 ● A comprehensive assessment of the gender-specific associations between  
17 eating-with-others and mortality for older adults.  
18  
19 ● The frequency, but not duration of time spent eating alone or eating-with-others was  
20 considered.  
21  
22 ● Participants were mainly of Chinese ethnicity from Taiwan so that the generalisability of  
23 findings may be limited.  
24  
25  
26  
27  
28  
29  
30  
31  
32  
33  
34  
35  
36  
37  
38  
39  
40  
41  
42  
43  
44  
45  
46  
47  
48  
49  
50  
51  
52  
53  
54  
55  
56  
57  
58  
59  
60

## INTRODUCTION

Social engagement, such as interpersonal relations (e.g., contact and transactions with friends), exchange of information, and receiving and providing emotional support, is a key component of healthy ageing, besides avoiding disease and maintaining physical and cognitive functions.<sup>1</sup> However, opportunities to interact are frequently reduced after retirement because of factors such as loss of physical capacity, loss of mobility, and solitary living.

The word “Meal” means the event of eating and what is eaten. For this reason, social interaction is considered one of the criteria for a meal.<sup>2</sup> Numerous countries offer nutritional programs, such as congregate meals or meals-on-wheels programs, to encourage eating in a social setting.<sup>3</sup> The inverse correlation between eating-with-others and risk of depression has been studied extensively.<sup>4-6</sup> Additionally, eating alone can be analyzed as a separate risk factor from living alone with regard to depression or depressive symptoms.<sup>5,6</sup> Eating-with-others can potentially improve dietary quality, variety, and energy intake through social facilitation. Depression and poor dietary quality increase the risk of chronic disease and mortality in older adults.<sup>7,8</sup> Solitary eating has been associated with a higher risk of mortality among small cohorts of elders in Botswana and the United States.<sup>9,10</sup> But, it is unclear whether the daily frequency of eating-with-others is associated with survivorship.

Gender is also a factor in the quality of older people’s lives; for example, women frequently exhibit more health-seeking behavior.<sup>11,12</sup> Yet men face higher risks of depression after widowhood than do women.<sup>13</sup> Exploring the gender-specific associations between solitary eating and mortality among older adults is potentially of public health value.

Providing simple, achievable steps for healthy ageing can prolong life, maintain quality of life over an extended duration, and limit physical deterioration, all of which are beneficial to public health. The purpose of this study was, therefore, to evaluate whether the daily frequency of eating-with-others is associated with all-cause mortality in a representative, free-living,

Taiwanese cohort of older men and women.

## **SUBJECTS AND METHODS**

### **Participants**

Participants aged 65 and over were recruited from the Elderly Nutrition and Health Survey in Taiwan during 1999–2000. The details of the survey design and sampling method have been published elsewhere.<sup>14</sup> In total, 1,937 older people completed face-to-face interviews with trained interviewers. We excluded 40 participants with incorrect identification or incorrect identity numbers and those who did not provide relevant or required information. After which 1,894 participants (955 men and 939 women) remained in the study. Trained interviewers collected data on sociodemographics, dietary habits and intake, and disease history. All participants signed informed consent forms prior to being interviewed. This project was approved by the Ethics Committees of the National Health Research Institute and Academia Sinica, Taiwan.

### **Eating arrangement**

Eating arrangements were assessed by asking participants whether they usually ate breakfast, lunch, and dinner with others. Their responses were recorded as one of the following four options: eat alone, eat with spouse, eat with children or relative(s), and eat with friend(s) or neighbor(s). We then classified the eating arrangements as eating-with-others 0 (eat alone), 1, 2, 3 times a day.<sup>15</sup> Information was also obtained about the person responsible for meal preparation.

### **Dietary assessment**

Information on frequency of dietary intake was collected using a validated simplified food

1  
2  
3  
4 frequency questionnaire.<sup>16</sup> Dietary quality and nutritional intake were measured through  
5  
6 one-day 24-hour dietary recall. The dietary quality was evaluated using the dietary diversity  
7  
8 score (DDS), which is based on the consumption of a half serving of the following six food  
9  
10 groups daily: grains; meat, fish, or eggs; dairy; vegetables; fruits; and oil or fat. The DDS  
11  
12 score ranges from 0 to 6, with a higher score representing higher dietary quality. The method  
13  
14 of nutrient intake calculation is described elsewhere.<sup>7</sup>  
15  
16  
17  
18  
19

### 20 **Other variables**

21  
22 Participants were also asked how frequently they cooked or aided with cooking (excluding  
23  
24 ready-to-eat meals), and their responses were recorded as never, sometimes, often, or usually.  
25  
26 Participants were then asked how many people they lived with. The response “0” was defined  
27  
28 as living alone.  
29

30  
31 Health-related quality of life was measured by a 36 item Short Form (SF-36) in a  
32  
33 validated traditional Chinese version. A total of 8 dimensions of health, included physical  
34  
35 functioning, role limitations due to physical problems, mental health, role limitations due to  
36  
37 emotional problems, social function, bodily pain, vitality and general health. The score was  
38  
39 calculated by the norm-based scoring system ( $\mu=50$ ,  $\sigma=10$ ) and standardised. Higher scores  
40  
41 indicated a better quality of life.<sup>17</sup>  
42  
43

44 Disability was evaluated by activities of daily living (ADL) which included 9 questions  
45  
46 about self-care task difficulty in an older adult’s daily life.  
47  
48  
49

### 50 **Outcome ascertainment**

51  
52 National Death Registry data were obtained from Taiwan’s Ministry of Health and Welfare.  
53  
54 We linked the NAHSIT dataset to the National Death Registry dataset using the participant ID  
55  
56 to determine survival rates. Follow-up time was calculated from date of interview to date of  
57  
58  
59  
60



1  
2  
3  
4 death or until December 31, 2008.  
5  
6  
7

### 8 **Statistical analysis**

9  
10 All data analyses were stratified by gender. Categorical variables and continuous variables  
11 were presented as n (%) or mean  $\pm$  standard errors (SE). Chi-square and ANOVA were used to  
12 determine the association between eating arrangements and baseline characteristics for  
13 categorical or continuous variables, respectively. The Cox proportional-hazards regression  
14 model was used to evaluate the association between daily frequency eating-with-others and  
15 risk of all-cause mortality. Additional factors were age, education level (illiterate, primary  
16 school, high school and above), marital status (married, bereaved, other), region (Hakka,  
17 mountains, Eastern Taiwan, Penghu, Northern Taiwan 1–3, Central Taiwan 1–3, Southern  
18 Taiwan 1–3), living arrangement (live alone, live with others), BMI (<18.5, 18.5–23.9,  
19 24.0–26.9,  $\geq 27$ ), DDS ( $\leq 3$ , 4, 5, 6), cooking frequency (never, sometimes, often, frequently),  
20 appetite status (good, fair, poor), ADL and self-rate financial statue (more than enough, just  
21 enough, not enough). All data analyses were performed using SAS 9.2 and SUDAAN 9.0 to  
22 adjust for the design effect of sampling.  
23  
24  
25  
26  
27  
28  
29  
30  
31  
32  
33  
34  
35  
36  
37  
38

39 To explore the pathways which might connect eating-with-others to survival, we have  
40 considered the intermediates of dietary quality (DDS), physical functioning, mental health,  
41 and general health. The first linkage, using continuous variables, has been assessed by  
42 Pearson's partial correlation coefficients. The second linkage to risk of mortality, as  
43 coefficients, has been assessed by the Aalen additive hazards model.<sup>18</sup>  
44  
45  
46  
47  
48  
49  
50  
51  
52

## 53 **RESULTS**

54  
55 In total, 63.1% of men and 56.4% of women ate with others 3 times a day. The mean age of  
56 men and women who ate alone was significantly higher than those who ate with others 3 times  
57  
58  
59  
60

1  
2  
3  
4 (74.9 vs. 72.7 years and 75.3 vs. 73.0 years). For both genders, those who ate with others were  
5  
6 more likely to be married, better financial status, living with others, and less cooking than  
7  
8 were those who ate alone. Men who ate alone had significantly higher ADLs than those who  
9  
10 ate with others ( $p=0.004$ ). (Table 1)

11  
12 Table 2 presents the dietary quality and food intakes for daily frequency of  
13  
14 eating-with-others by gender. A total of 24.1% of men and 30.2% of women who ate alone  
15  
16 had a poor dietary quality ( $DDS \leq 3$ ), compared to those who ate with others 3 times daily  
17  
18 (12.1%, 17.5% respectively). Men who ate alone ate less meat (1.02 vs. 1.30 times/d) and  
19  
20 vegetables (1.90 vs. 2.47 times/d) than did those who ate with others 3 times a day ( $p<0.05$ ).  
21  
22 Women who ate with others 3 times a day tended to eat more meat (1.13 vs 0.81 times/d),  
23  
24 seafood (0.99 vs. 0.70 times/d), eggs (0.38 vs. 0.23 times/d), and vegetable (2.52 vs. 2.09  
25  
26 times/d) intake than did those who ate alone ( $p<0.05$ ). Further, women who ate alone had  
27  
28 lower fat (24.7 vs. 28.9 g/1000 kcal/d) intakes, but higher carbohydrate (155 vs. 144 g/1000  
29  
30 kcal/d) intakes compared with those who ate with others ( $p<0.05$ ).  
31  
32  
33

34  
35 Regarding meals, 57.6%, 59.0%, and 60.0% of men and 74.0%, 68.1%, and 67.7% of  
36  
37 women prepared breakfast, lunch, and dinner respectively when eating alone. Men were more  
38  
39 likely to eat out (highest of 24.3% for lunch) when eating-with-others once a day compared  
40  
41 with women (highest of 7.73% for lunch). Furthermore, men who prepared meals for  
42  
43 themselves when eating alone were more likely to have purchased the food (61.2%) than were  
44  
45 those who ate with others.  
46  
47

48  
49 Men who ate with others twice per day have significantly high physical functioning  
50  
51 compared with other groups ( $p=0.044$ ). For women, who ate with others once per day have  
52  
53 higher physical functioning (50.7 vs. 45.2) and role limitations due to physical problem (51.4  
54  
55 vs. 46.1) compared with those who ate alone. (Table 3)

56  
57 Table 4 presents the association between daily frequency eating-with-others and risk of  
58  
59

1  
2  
3  
4 all-cause mortality by gender. In the crude model, the HRs (95% CI) of risk of all-cause  
5 mortality for who ate with others 2 or 3 times a day were 0.42 (0.28–0.61), 0.67 (0.52–0.88)  
6  
7  
8 in men and 0.68 (0.42–1.11), 0.86 (0.64–1.16) in women compared with those who ate alone,  
9  
10 respectively. When adjusted for age, education, marital status, region, living arrangement,  
11  
12 cooking, appetite status, ADL, DDS, BMI, the HRs (95% CI) were 0.43 (0.25–0.73), 0.63  
13  
14 (0.41–0.98) for men and 0.68 (0.35–1.30), 0.69 (0.39–1.21) for women who ate with others 2  
15  
16 or 3 times a day. With further adjustment for financial status, the risk of mortality is reduced  
17  
18 by 54% (HR: 0.46, 95% CI: 0.28–0.77) and 44% (HR: 0.66, 95% CI: 0.43–1.02) for men who  
19  
20 ate with others 2 or 3 times a day.  
21  
22  
23

24 The pathway analyses are shown in Figure 1. For men, there are significant positive  
25  
26 associations between eating-with-others frequency and dietary quality (DDS) ( $p=0.006$ ) as  
27  
28 well as mental health ( $p=0.0009$ ). In turn, better dietary quality ( $p<0.0001$ ) is associated with  
29  
30 less mortality risk, as are physical functioning ( $p<0.0001$ ) and general health ( $p=0.007$ ). For  
31  
32 women, eating-with-others is not associated with any of dietary quality, physical functioning,  
33  
34 mental health or general health; however, dietary quality ( $p=0.0004$ ) and physical functioning  
35  
36 ( $p<0.0001$ ) are inversely associated with mortality risk, while mental health ( $p=0.043$ ) is  
37  
38 positively associated.  
39  
40  
41  
42  
43

## 44 **DISCUSSION**

45  
46 This study explored the gender-specific associations between eating arrangement and risk of  
47  
48 mortality by observing a population-representative older adult cohort with a 10-year follow-up  
49  
50 in an Asian country. Eating-with-others was inversely associated with risk of mortality, more  
51  
52 evident in men than in women.  
53  
54  
55  
56

### 57 **Food intake when eating-with-others**

1  
2  
3  
4 Eating-with-others has numerous beneficial effects on health. A randomized controlled trial at  
5  
6 a Dutch nursing home found that family-style meals that included the presence of others  
7  
8 increased the energy intake and reduced the prevalence of malnutrition. Those who ate with  
9  
10 others ate more than those who ate alone. Social eating may stimulate intake through extension  
11  
12 of meal duration and improved ambiance.<sup>19</sup> The presence of others in the household did not  
13  
14 affect energy intake, but the presence of others during mealtime did, with an average of 114  
15  
16 calories more per meal than those who ate alone.<sup>20</sup> Eating socially also improved dietary  
17  
18 quality and diversity.<sup>21</sup> However, the present study shows that after control for dietary quality in  
19  
20 the model, eating-with-others and mortality remains associated. A possible reason for this is  
21  
22 that solitary eating is often associated with depression,<sup>4-6</sup> in turn associated with mortality.  
23  
24  
25  
26  
27

### 28 **Eating-with-others and mortality**

29  
30 Our findings are consistent with several studies from Western countries. The Nutrition  
31  
32 Screening Initiative (NSI) checklist, a tool for malnutrition screening and awareness in older  
33  
34 adults in the US, asks questions regarding solitary eating. In a cohort study with 581  
35  
36 community-dwelling older adults, who ate more than 17 meals alone per week, exhibited a  
37  
38 2.07-fold higher risk of mortality (RR=2.07, 95% CI=1.49–2.86) over an 8–12-year period.<sup>10</sup>  
39  
40 Another study in Botswana found that older adults who ate alone had a higher risk of death  
41  
42 (OR=6.7, 95% CI=2.2–20.0).<sup>9</sup> However, these studies did not factor in gender.  
43  
44  
45  
46  
47

### 48 **Eating alone and gender**

49  
50 In the present study, men who ate with others had a lower risk of mortality than did those who  
51  
52 ate alone, for several probable reasons. Men who ate with others had better dietary quality and a  
53  
54 higher vegetable intake than those eating alone. We also found that men who ate alone were  
55  
56 more likely to eat out, not prepare meals by themselves, and frequently skip meals than did  
57  
58  
59  
60

1  
2  
3  
4 women. A Japanese cohort study discovered that men who ate alone were more likely to be  
5  
6 underweight and skip meals and less likely to eat fruits and vegetables.<sup>21</sup> Underweight older  
7  
8 adults with poor dietary quality and low fruit and vegetable intakes have been associated with a  
9  
10 higher risk of mortality.<sup>7 22</sup> Furthermore, in our study, eating out is often associated with  
11  
12 high-fat foods with poor quality. Men who were solitary eaters had low carbohydrate, protein,  
13  
14 dietary fiber, and other nutrient intakes, but a higher fat intake than those who ate with others,  
15  
16 although the differences were non-significant.  
17

18  
19 Compared with Japan,<sup>21</sup> in our study men have a higher rate of solitary eating, but women  
20  
21 have a lower rate. Taiwanese men who eat alone are more likely to be unmarried or live  
22  
23 separately from their spouse. We found that the eating companionship of men who ate with  
24  
25 others was usually their spouse or children rather than friends or neighbours (data not shown).  
26  
27 Davis et al. found that dietary patterns of older men had stronger associations with living  
28  
29 arrangements than did those of older women.<sup>23</sup> Cooking itself is a physical activity and a  
30  
31 cognitive function, and in Taiwanese culture women are more likely to prepare meals. Men eat  
32  
33 out or buy ready-to-eat food more than they cook. In this study, men (47.0%) cooked less than  
34  
35 did women (63.9%) when eating alone (Table 1). Men who ate alone shopped more than did  
36  
37 women who ate alone (27.6% vs. 9.6%).  
38  
39  
40  
41  
42  
43

#### 44 **Pathways from eating-with-others to survival**

45  
46 For men but not women, pathway analyses indicate that dietary quality, assessed as dietary  
47  
48 diversity, provides a potential connection between the social aspect of eating-with-others and  
49  
50 survival (Figure 1). This underscores the likely basic importance of nutritional factors in  
51  
52 life-long health, but draws attention to the social as well as the biomedical role of food in  
53  
54 health. For men, on pathway analysis, eating-with-others is associated with better mental  
55  
56 health. Since pathway analysis requires that all independent variables are continuous, this may  
57  
58  
59  
60

1  
2  
3  
4 have resulted in an absence of a significant direct association of eating-with-others with  
5  
6 mortality due to its frequency not being linearly related to mortality; this contrasts with the  
7  
8 survival analyses by Cox regression (Table 4). In addition, by pathway analysis, each of  
9  
10 physical functioning and general health are themselves important in the prediction of  
11  
12 mortality risk in men. It remains conceivable that the dietary quality that men achieve,  
13  
14 irrespective of eating-with-others, plays a role in each of physical functioning and general  
15  
16 health, which is evident in this population.<sup>7 17</sup>

17  
18  
19 In the case of women, dietary quality directly and favourably predicts survival, but this  
20  
21 connection is not found to be dependent on eating-with-others. Perhaps women can achieve  
22  
23 the biomedical benefit of survival through diet without the need for its social function. In  
24  
25 addition, women have a more favourable survival with better physical functioning.  
26  
27 Somewhat surprisingly, better mental health is unfavourably associated with survival,  
28  
29 although this is weakly significant. It is possible that confounders that have not been  
30  
31 considered in this pathway analysis might account for this mental health association with  
32  
33 mortality in older women. For example, in devoting themselves to the care of others, or in  
34  
35 dealing successfully with a relative socio-economic disadvantage in widowhood, a sense of  
36  
37 wellbeing may obtain, while health adversity supervenes.  
38  
39  
40  
41  
42  
43

#### 44 **Limitations**

45  
46 There are some limitations to this study. First, the association may be affected by the duration of  
47  
48 time spent eating alone or eating-with-others, which was not considered. Second, in Taiwanese  
49  
50 society, older people are more likely to live with and depend on their families, so the culturally  
51  
52 specific nature of this study may limit its applicability elsewhere. The study should be  
53  
54 considered within a Taiwanese (of perhaps a broader Asian) context. As with cohort studies in  
55  
56 general, there may have been confounders not considered which might have explained the  
57  
58  
59  
60

1  
2  
3  
4 associations presented. The study itself, however, has sought to consider the circumstances of  
5  
6 eating which are usually neglected in the exploration of food and nutrient health relationships.  
7  
8 The pathway analyses are an attempt to encompass more of the explanatory models for these  
9  
10 relationships by way of inclusion of physical, mental and general health. The gender  
11  
12 differences which are now recognised here and in other reports for the respective health roles of  
13  
14 dietary quality on the one hand, and with whom the food is consumed on the other, are a  
15  
16 challenge to more gender comprehensive public health policy.  
17  
18  
19  
20  
21

## 22 **Conclusions**

23  
24 Eating socially may benefit survival in elderly men through the adjunct of dietary quality; it is  
25  
26 also positively associated with men's mental health. For women, dietary quality is associated  
27  
28 with survival advantage which is not apparently dependent on eating-with-others. The relative  
29  
30 gender advantage in longevity that women have in this population is not adequately explained  
31  
32 in the present study, except that they are likely to be the ones who eat with men who benefit  
33  
34 from this social role of food. Thus, for men and women, the provision of a healthy social  
35  
36 environment which increases social interactions should improve health outcomes.  
37  
38  
39  
40  
41

## 42 **ACKNOWLEDGMENT**

43  
44 The Elderly Nutrition and Health Survey (NAHSIT Elderly) in Taiwan 1997–2002 project  
45  
46 was conducted by the Institute of Biomedical Sciences of Academia Sinica and the Research  
47  
48 Center for the Humanities and Social Sciences, Center for Survey Research, Academia Sinica,  
49  
50 directed by Wen-Harn Pan and Su-Hao Tu, and sponsored by the Taiwan Department of Health.  
51

52  
53 This study is based in part on data from Department of Health and managed by the National  
54  
55 Health Research Institutes. The interpretation and conclusions contained herein do not  
56  
57 represent those of Department of Health, or National Health Research Institutes.  
58  
59  
60

1  
2  
3  
4 None of the authors has any conflicts of interest to declare.  
5  
6  
7

#### 8 9 **AUTHOR'S CONTRIBUTION**

10 YCH, HLC, MLW and MSL designed the study; YCH, HLC and YTCL performed statistical  
11 analysis; YCH, MLW, YTCL, and MSL wrote the paper; MSL had primary responsibility for  
12 the final content.  
13  
14  
15  
16

#### 17 18 19 20 **COMPETING INTERESTS**

21 No author has any conflict of interest in regard to this paper.  
22  
23  
24  
25  
26

#### 27 **FOUNDING**

28 This work was supported by the Ministry of Science and Technology grant number  
29 MOST-103-2320-B-016-015-MY2.  
30  
31  
32  
33  
34  
35

#### 36 **DATA SHARING STATEMENT**

37 No additional data are available.  
38  
39  
40  
41  
42

#### 43 **ETHICS**

44 This project was approved by the Ethics Committees of the National Health Research Institute  
45 and Academia Sinica, Taiwan.  
46  
47  
48  
49  
50

#### 51 **COPYRIGHT/LICENSE FOR PUBLISH**

52 "I Meei-Shyuan Lee The Corresponding Author of this article contained within the original  
53 manuscript which includes any diagrams & photographs and any related or stand alone film  
54  
55  
56  
57  
58  
59  
60



1  
2  
3  
4 submitted (the Contribution”) has the right to grant on behalf of all authors and does grant on  
5  
6 behalf of all authors, a licence to the “BMJ Publishing Group Ltd” (“BMJ”) and its licensees,  
7  
8 to permit this Contribution (if accepted) to be published in any BMJ products and to exploit  
9  
10 all subsidiary rights, as set out in our licence set out at:  
11

12  
13 [http://group.bmj.com/products/journals/instructions-forauthors/wholly\\_owned\\_licence.pdf](http://group.bmj.com/products/journals/instructions-forauthors/wholly_owned_licence.pdf)  
14  
15  
16  
17  
18  
19  
20  
21  
22  
23  
24  
25  
26  
27  
28  
29  
30  
31  
32  
33  
34  
35  
36  
37  
38  
39  
40  
41  
42  
43  
44  
45  
46  
47  
48  
49  
50  
51  
52  
53  
54  
55  
56  
57  
58  
59  
60

For peer review only

## REFERENCES

1. Rowe JW, Kahn RL. Successful aging. *Gerontologist* 1997;37:433–40.
2. Meiselman HL. Dimensions of the meal. *Journal of Foodservice* 2008;19:13–21. doi: 10.1111/j.1745-4506.2008.00076.x.
3. Administration for Community Living., US Department of Health and Human Services. Nutrition Services (OAA Title IIIC) - Congregate Nutrition Services Washington, DC: Administration for Community Living, US Department of Health and Human Services; 2016 [cited 2016 18th April]. Available from: [http://www.aoa.gov/AoA\\_programs/HPW/Nutrition\\_Services/index.aspx#congregate](http://www.aoa.gov/AoA_programs/HPW/Nutrition_Services/index.aspx#congregate) accessed 18th April 2016.
4. Kuroda A, Tanaka T, Hirano H, *et al.* Eating alone as social disengagement is strongly associated with depressive symptoms in Japanese community-dwelling older adults. *J Am Med Dir Assoc* 2015;16:578–85. doi: 10.1016/j.jamda.2015.01.078.
5. Tani Y, Sasaki Y, Haseda M, *et al.* Eating alone and depression in older men and women by cohabitation status: The JAGES longitudinal survey. *Age Ageing* 2015;44:1019–26. doi: 10.1093/ageing/afv145.
6. Wang X, Shen W, Wang C, *et al.* Association between eating alone and depressive symptom in elders: a cross-sectional study. *BMC Geriatr* 2016;16:19. doi: 10.1186/s12877-016-0197-2.
7. Lee MS, Huang YC, Su HH, *et al.* A simple food quality index predicts mortality in elderly Taiwanese. *J Nutr Health Aging* 2011;15:815–21.
8. Schoevers RA, Geerlings MI, Beekman AT, *et al.* Association of depression and gender with mortality in old age. Results from the Amsterdam Study of the Elderly (AMSTEL). *Br J Psychiatry* 2000;177:336–42.
9. Clausen T, Wilson AO, Molebatsi RM, *et al.* Diminished mental- and physical function and

- 1  
2  
3 lack of social support are associated with shorter survival in community dwelling older  
4  
5 persons of Botswana. *BMC Public Health* 2007;7:144. doi: 10.1186/1471-2458-7-144.  
6  
7  
8 10. Sahyoun NR, Jacques PF, Dallal GE, *et al.* Nutrition Screening Initiative Checklist may  
9  
10 be a better awareness/educational tool than a screening one. *J Am Diet Assoc*  
11  
12 1997;97:760–4. doi: 10.1016/s0002-8223(97)00188-0.  
13  
14 11. Ek S. Gender differences in health information behaviour: a Finnish population-based  
15  
16 survey. *Health Promot Int* 2015;30:736–45. doi: 10.1093/heapro/dat063.  
17  
18  
19 12. Redondo-Sendino A, Guallar-Castillon P, Banegas JR, *et al.* Gender differences in the  
20  
21 utilization of health-care services among the older adult population of Spain. *BMC*  
22  
23 *Public Health* 2006;6:155. doi: 10.1186/1471-2458-6-155.  
24  
25 13. Umberson D, Wortman CB, Kessler RC. Widowhood and depression: explaining  
26  
27 long-term gender differences in vulnerability. *J Health Soc Behav* 1992;33:10–24.  
28  
29  
30 14. Wu SJ, Chang YH, Wei IL, *et al.* Intake levels and major food sources of energy and  
31  
32 nutrients in the Taiwanese elderly. *Asia Pac J Clin Nutr* 2005;14:211–20.  
33  
34 15. Cheng SL. Eating-with-others and the health of older people. School of Public Health.  
35  
36 National Defense Medical Center, 2014.  
37  
38  
39 16. Huang YC, Lee MS, Pan WH, *et al.* Validation of a simplified food frequency  
40  
41 questionnaire as used in the Nutrition and Health Survey in Taiwan (NAHSIT) for the  
42  
43 elderly. *Asia Pac J Clin Nutr* 2011;20:134–40.  
44  
45 17. Lee MS, Chen RCY, Chang YH, *et al.* Physical function mitigates the adverse effects of  
46  
47 being thin on mortality in a freeliving older Taiwanese cohort. *J Nutr Health Aging*  
48  
49 2012;16:766–83.  
50  
51  
52 18. Gamborg M, Jensen GB, Sorensen TI, *et al.* Dynamic path analysis in life-course  
53  
54 epidemiology. *Am J Epidemiol* 2011;173:1131–9. doi: 10.1093/aje/kwq502.  
55  
56  
57 19. Nijs KA, de Graaf C, Siebelink E, *et al.* Effect of family-style meals on energy intake and  
58  
59  
60

- 1  
2  
3 risk of malnutrition in dutch nursing home residents: a randomized controlled trial. *J*  
4  
5 *Gerontol A Biol Sci Med Sci* 2006;61:935–42.  
6  
7  
8 20. Locher JL, Robinson CO, Roth DL, *et al*. The effect of the presence of others on caloric  
9  
10 intake in homebound older adults. *J Gerontol A Biol Sci Med Sci* 2005;60:1475–8.  
11  
12 21. Tani Y, Kondo N, Takagi D, *et al*. Combined effects of eating alone and living alone on  
13  
14 unhealthy dietary behaviors, obesity and underweight in older Japanese adults: Results  
15  
16 of the JAGES. *Appetite* 2015;95:1–8. doi: 10.1016/j.appet.2015.06.005.  
17  
18 22. Trichopoulou A, Kouris-Blazos A, Wahlqvist ML, *et al*. Diet and overall survival in  
19  
20 elderly people. *BMJ* 1995;311:1457–60.  
21  
22 23. Davis MA, Randall E, Forthofer RN, *et al*. Living arrangements and dietary patterns of  
23  
24 older adults in the United States. *J Gerontol* 1985;40:434–42.  
25  
26  
27  
28  
29  
30  
31  
32  
33  
34  
35  
36  
37  
38  
39  
40  
41  
42  
43  
44  
45  
46  
47  
48  
49  
50  
51  
52  
53  
54  
55  
56  
57  
58  
59  
60

1  
2  
3  
4  
5  
6  
7  
8  
9  
10  
11  
12  
13  
14  
15  
16  
17  
18  
19  
20  
21  
22  
23  
24  
25  
26  
27  
28  
29  
30  
31  
32  
33  
34  
35  
36  
37  
38  
39  
40  
41  
42  
43  
44  
45  
46  
47  
48  
49  
50  
51  
52  
53  
54  
55  
56  
57  
58  
59  
60

**LEGENDS**

Figure 1. Pathway analysis for the associations of eating-with-others and all-cause mortality.

All values are presented as  $\beta$  coefficients with their p values.

For peer review only

Table 1. The baseline characteristics by daily frequency for eating-with-others

| Variables                            | Daily frequency for eating-with-others |           |           |           |           |         |           |           |           |           |           |         |
|--------------------------------------|----------------------------------------|-----------|-----------|-----------|-----------|---------|-----------|-----------|-----------|-----------|-----------|---------|
|                                      | Men                                    |           |           |           |           |         | Women     |           |           |           |           |         |
|                                      | Total                                  | 0         | 1         | 2         | 3         | p value | Total     | 0         | 1         | 2         | 3         | p value |
| N                                    |                                        | 142       | 57        | 126       | 630       |         |           | 174       | 79        | 140       | 546       |         |
| %                                    |                                        | 14.3      | 6.96      | 15.6      | 63.1      |         |           | 17.8      | 10.2      | 15.7      | 56.4      |         |
| Median of follow-up (yrs)            |                                        | 8.17      | 8.28      | 8.76      | 8.67      |         |           | 8.55      | 8.89      | 8.75      | 8.74      |         |
| Age at baseline (yrs)                | 72.9±0.33                              | 74.9±0.65 | 71.8±0.74 | 72.4±0.73 | 72.7±0.44 | 0.042   | 73.4±0.44 | 75.3±0.76 | 72.9±0.65 | 72.9±0.88 | 73.0±0.39 | 0.020   |
| Education                            |                                        |           |           |           |           | <0.0001 |           |           |           |           |           | 0.963   |
| Illiterate                           | 18.8                                   | 24.2      | 16.7      | 8.8       | 20.3      |         | 56.0      | 57.5      | 55.6      | 52.3      | 56.6      |         |
| Some up to primary school            | 46.6                                   | 52.3      | 43.5      | 48.4      | 45.2      |         | 32.3      | 32.5      | 32.0      | 33.8      | 31.9      |         |
| High school and above                | 34.7                                   | 23.5      | 39.9      | 42.8      | 34.5      |         | 11.7      | 10.0      | 12.4      | 13.8      | 11.5      |         |
| Marital status                       |                                        |           |           |           |           | <0.0001 |           |           |           |           |           | <0.0001 |
| Married                              | 78.6                                   | 36.1      | 48.2      | 75.0      | 95.5      |         | 49.48     | 15.5      | 19.6      | 37.8      | 68.8      |         |
| Bereaved                             | 14.3                                   | 37.8      | 38.8      | 17.5      | 5.43      |         | 48.12     | 80.6      | 71.1      | 60.7      | 30.3      |         |
| Others                               | 7.15                                   | 26.1      | 13.0      | 7.55      | 2.11      |         | 2.40      | 3.87      | 9.32      | 1.56      | 0.95      |         |
| Live alone                           | 13.7                                   | 60.4      | 0.00      | 9.67      | 1.47      | <0.0001 | 10.3      | 49.4      | 6.43      | 2.91      | 0.42      | <0.0001 |
| Whether enough money                 |                                        |           |           |           |           | 0.030   |           |           |           |           |           | 0.001   |
| More than enough                     | 78.4                                   | 71.8      | 79.9      | 85.8      | 77.8      |         | 75.0      | 64.1      | 63.1      | 78.3      | 79.5      |         |
| Just enough                          | 19.2                                   | 21.7      | 20.2      | 13.0      | 20.1      |         | 21.0      | 28.7      | 28.8      | 21.0      | 17.2      |         |
| Not enough                           | 2.46                                   | 6.52      | 0.00      | 1.26      | 2.14      |         | 4.01      | 7.23      | 8.13      | 0.70      | 3.25      |         |
| Smoker                               | 65.7                                   | 70.5      | 82.0      | 63.9      | 63.2      | 0.078   | 4.92      | 2.44      | 2.55      | 5.34      | 6.01      | 0.171   |
| Appetite status                      |                                        |           |           |           |           | 0.232   |           |           |           |           |           | 0.112   |
| Good                                 | 38.5                                   | 33.0      | 45.0      | 36.6      | 39.4      |         | 30.4      | 24.9      | 42.9      | 31.7      | 29.5      |         |
| Fair                                 | 55.5                                   | 62.5      | 41.5      | 59.4      | 54.5      |         | 59.4      | 57.2      | 48.8      | 61.5      | 61.4      |         |
| Poor                                 | 6.07                                   | 4.54      | 13.5      | 4.09      | 6.08      |         | 10.2      | 17.9      | 8.34      | 6.87      | 9.14      |         |
| Body mass index (kg/m <sup>2</sup> ) | 23.3±0.15                              | 22.9±0.46 | 23.2±0.64 | 23.2±0.33 | 23.3±0.17 | 0.738   | 23.9±0.25 | 23.3±0.56 | 25.1±0.43 | 24.5±0.50 | 23.8±0.28 | 0.0002  |
| < 18.5                               | 7.07                                   | 11.2      | 10.4      | 7.53      | 5.66      |         | 7.01      | 8.07      | 0.00      | 3.83      | 8.72      |         |
| 18.5–23.9                            | 52.5                                   | 54.1      | 53.4      | 50.6      | 52.6      |         | 44.0      | 51.0      | 39.6      | 40.9      | 43.6      |         |

1  
2  
3  
4  
5  
6  
7  
8  
9  
10  
11  
12  
13  
14  
15  
16  
17  
18  
19  
20  
21  
22  
23  
24  
25  
26  
27  
28  
29  
30  
31  
32  
33  
34  
35  
36  
37  
38  
39  
40  
41  
42  
43  
44  
45  
46  
47  
48  
49

|                             |           |           |           |           |           |         |           |           |           |           |           |       |
|-----------------------------|-----------|-----------|-----------|-----------|-----------|---------|-----------|-----------|-----------|-----------|-----------|-------|
| 24.0–26.9                   | 28.0      | 19.0      | 19.9      | 34.0      | 29.2      |         | 27.8      | 24.7      | 34.1      | 25.3      | 28.1      |       |
| ≥ 27.0                      | 12.5      | 15.7      | 16.3      | 7.91      | 12.6      |         | 21.3      | 16.3      | 26.3      | 30.0      | 19.6      |       |
| Physical activity (MET/day) |           |           |           |           |           | 0.173   |           |           |           |           |           | 0.017 |
| <1.5                        | 51.6      | 45.3      | 44.0      | 51.2      | 54.0      |         | 61.1      | 60.5      | 51.0      | 52.9      | 65.4      |       |
| 1.5–2.9                     | 11.3      | 14.3      | 17.9      | 14.2      | 9.17      |         | 11.8      | 14.3      | 6.16      | 14.0      | 11.4      |       |
| ≥3                          | 37.1      | 40.4      | 38.1      | 34.7      | 36.8      |         | 27.1      | 25.2      | 42.8      | 33.1      | 23.2      |       |
| Shopping                    |           |           |           |           |           | 0.239   |           |           |           |           |           | 0.037 |
| <1/wk                       | 43.8      | 34.2      | 44.5      | 45.9      | 45.5      |         | 54.9      | 65.3      | 46.6      | 50.9      | 54.3      |       |
| 1/wk                        | 12.7      | 13.5      | 15.2      | 13.0      | 12.2      |         | 13.6      | 10.2      | 14.8      | 18.4      | 13.1      |       |
| 1–2/wk                      | 23.3      | 24.7      | 21.0      | 19.6      | 24.2      |         | 19.8      | 14.9      | 24.7      | 22.0      | 19.8      |       |
| Everyday                    | 20.2      | 27.6      | 19.3      | 21.6      | 18.3      |         | 11.7      | 9.63      | 13.9      | 8.74      | 12.9      |       |
| Current cooking activity    |           |           |           |           |           | <0.0001 |           |           |           |           |           | 0.004 |
| Never                       | 58.4      | 33.2      | 44.1      | 58.1      | 65.8      |         | 26.8      | 24.1      | 12.1      | 31.5      | 29.1      |       |
| Sometimes                   | 20.3      | 13.1      | 19.2      | 24.8      | 20.8      |         | 13.2      | 5.10      | 9.1       | 16.0      | 15.8      |       |
| Often                       | 6.83      | 6.63      | 11.4      | 9.63      | 5.66      |         | 10.5      | 6.94      | 20.0      | 12.6      | 9.23      |       |
| Usually                     | 14.5      | 47.0      | 25.2      | 7.46      | 7.69      |         | 49.5      | 63.9      | 58.8      | 39.9      | 45.9      |       |
| Activities of daily living  | 0.33±0.05 | 0.52±0.18 | 0.19±0.15 | 0.07±0.05 | 0.36±0.07 | 0.004   | 0.57±0.08 | 1.18±0.34 | 0.27±0.13 | 0.28±0.17 | 0.50±0.10 | 0.088 |

All data weighted for unequal probability of sampling design by SUDAAN. Categorical variables are presented as n (%), and continuous variables are presented as mean±SE.

ANOVA and chi-square were used for continuous and categories variables to test difference between the groups by gender.

Table 2. Food, nutrient intakes and daily frequency of eating-with-others by gender

|                                                               | Daily frequency for eating-with-others |      |      |      |         |       |      |      |      |         |
|---------------------------------------------------------------|----------------------------------------|------|------|------|---------|-------|------|------|------|---------|
|                                                               | Men                                    |      |      |      |         | Women |      |      |      |         |
|                                                               | 0                                      | 1    | 2    | 3    | p value | 0     | 1    | 2    | 3    | p value |
| Food preparation, %                                           |                                        |      |      |      |         |       |      |      |      |         |
| Skipping meals                                                | 11.2                                   | 16.5 | 5.75 | 2.96 | 0.008   | 6.54  | 8.45 | 4.76 | 4.27 | 0.370   |
| Who prepared breakfast?                                       |                                        |      |      |      | <0.0001 |       |      |      |      | 0.003   |
| Self                                                          | 57.6                                   | 45.7 | 37.0 | 12.7 |         | 74.0  | 76.2 | 61.3 | 57.2 |         |
| Others                                                        | 28.6                                   | 36.4 | 56.1 | 85.8 |         | 23.9  | 20.7 | 36.1 | 41.5 |         |
| Eating out                                                    | 13.8                                   | 17.9 | 6.96 | 1.52 |         | 2.14  | 3.12 | 2.62 | 1.35 |         |
| Who prepared lunch?                                           |                                        |      |      |      | <0.0001 |       |      |      |      | 0.0001  |
| Self                                                          | 59.0                                   | 40.8 | 11.3 | 9.07 |         | 68.1  | 74.2 | 48.0 | 53.1 |         |
| Others                                                        | 31.3                                   | 34.9 | 85.0 | 89.0 |         | 26.3  | 18.1 | 50.0 | 45.2 |         |
| Eating out                                                    | 9.72                                   | 24.3 | 3.66 | 1.90 |         | 5.59  | 7.73 | 1.96 | 1.63 |         |
| Who prepared dinner?                                          |                                        |      |      |      | <0.0001 |       |      |      |      | 0.009   |
| Self                                                          | 60.0                                   | 25.0 | 6.20 | 8.52 |         | 67.7  | 60.1 | 44.6 | 51.4 |         |
| Others                                                        | 32.9                                   | 74.0 | 92.1 | 90.7 |         | 30.2  | 39.9 | 55.4 | 48.1 |         |
| Eating out                                                    | 7.05                                   | 1.03 | 1.73 | 0.76 |         | 2.11  | 0.00 | 0.00 | 0.51 |         |
| If you need to prepare meals for yourself, who gets the food? |                                        |      |      |      | <0.0001 |       |      |      |      | 0.118   |
| Never prepare                                                 | 6.21                                   | 15.8 | 9.38 | 9.32 |         | 8.37  | 1.67 | 5.24 | 6.60 |         |
| Self                                                          | 61.2                                   | 23.4 | 21.2 | 18.6 |         | 60.2  | 67.4 | 48.2 | 48.4 |         |
| Others                                                        | 32.6                                   | 60.8 | 69.5 | 72.1 |         | 31.4  | 31.0 | 46.6 | 45.0 |         |
| Dietary diversity score, %                                    |                                        |      |      |      | 0.010   |       |      |      |      | 0.001   |
| ≤3                                                            | 24.1                                   | 22.1 | 12.2 | 12.1 |         | 30.2  | 20.7 | 8.05 | 17.5 |         |
| 4                                                             | 30.0                                   | 41.4 | 30.2 | 32.4 |         | 24.1  | 31.2 | 31.5 | 31.3 |         |
| 5                                                             | 35.4                                   | 28.4 | 39.6 | 35.8 |         | 25.1  | 31.7 | 42.8 | 34.8 |         |



1  
2  
3  
4  
5  
6  
7  
8  
9  
10  
11  
12  
13  
14  
15  
16  
17  
18  
19  
20  
21  
22  
23  
24  
25  
26  
27  
28  
29  
30  
31  
32  
33  
34  
35  
36  
37  
38  
39  
40  
41  
42  
43  
44  
45  
46  
47  
48  
49

|                                                  | 6         | 10.8      | 8.13      | 18.0      | 19.7  |           | 20.7      | 16.4      | 17.6      | 16.4  |  |
|--------------------------------------------------|-----------|-----------|-----------|-----------|-------|-----------|-----------|-----------|-----------|-------|--|
| Food intake other than cereal (times/d), mean±SE |           |           |           |           |       |           |           |           |           |       |  |
| Dairy                                            | 0.57±0.07 | 0.40±0.09 | 0.65±0.08 | 0.62±0.05 | 0.116 | 0.80±0.08 | 0.89±0.14 | 0.74±0.09 | 0.72±0.05 | 0.480 |  |
| Meat                                             | 1.02±0.09 | 1.98±0.08 | 1.59±0.19 | 1.30±0.07 | 0.001 | 0.81±0.15 | 0.86±0.16 | 1.20±0.16 | 1.13±0.08 | 0.017 |  |
| Seafood                                          | 0.86±0.18 | 0.93±0.12 | 1.08±0.12 | 0.99±0.08 | 0.524 | 0.70±0.10 | 0.92±0.12 | 0.91±0.09 | 0.99±0.07 | 0.026 |  |
| Egg                                              | 0.44±0.08 | 0.39±0.05 | 0.46±0.05 | 0.46±0.03 | 0.687 | 0.23±0.03 | 0.36±0.04 | 0.36±0.03 | 0.38±0.03 | 0.003 |  |
| Soy                                              | 0.48±0.09 | 0.43±0.06 | 0.47±0.06 | 0.45±0.04 | 0.824 | 0.39±0.06 | 0.50±0.10 | 0.61±0.07 | 0.51±0.05 | 0.063 |  |
| Vegetable                                        | 1.90±0.18 | 1.84±0.13 | 2.57±0.13 | 2.47±0.12 | 0.004 | 2.09±0.14 | 2.28±0.13 | 2.35±0.14 | 2.52±0.14 | 0.011 |  |
| Fruit                                            | 0.99±0.11 | 0.93±0.13 | 1.21±0.09 | 1.19±0.04 | 0.073 | 0.91±0.10 | 0.90±0.07 | 1.21±0.10 | 1.07±0.06 | 0.058 |  |
| Total energy intake (kcal), mean±SE              | 1833±100  | 1849±123  | 1871±118  | 1815±77.4 | 0.940 | 1327±92.6 | 1518±126  | 1500±58.7 | 1521±84.3 | 0.206 |  |
| Nutrient density (/1,000 kcal), mean±SE          |           |           |           |           |       |           |           |           |           |       |  |
| Carbohydrate (g)                                 | 132±4.79  | 137±5.21  | 139±2.58  | 139±2.71  | 0.438 | 155±3.55  | 143±5.63  | 144±3.31  | 144±1.82  | 0.028 |  |
| Dietary fiber (g)                                | 11.2±0.79 | 11.7±0.87 | 12.4±0.75 | 11.7±0.45 | 0.653 | 15.5±2.05 | 14.1±1.44 | 14.0±1.02 | 12.7±0.57 | 0.416 |  |
| Fat (g)                                          | 32.1±1.42 | 30.5±2.15 | 30.2±1.28 | 29.5±0.82 | 0.377 | 24.7±1.13 | 29.7±2.30 | 29.2±1.50 | 28.9±0.85 | 0.002 |  |
| Protein (g)                                      | 41.9±1.80 | 43.3±2.52 | 41.5±1.34 | 43.2±1.16 | 0.690 | 41.6±1.77 | 42.1±2.06 | 42.8±1.32 | 41.8±1.27 | 0.923 |  |
| Vitamin B-1 (mg)                                 | 0.63±0.06 | 0.78±0.07 | 0.69±0.04 | 0.70±0.03 | 0.645 | 0.71±0.08 | 0.69±0.05 | 0.76±0.07 | 0.66±0.03 | 0.449 |  |
| Vitamin B-2 (mg)                                 | 0.84±0.06 | 0.88±0.12 | 0.78±0.06 | 0.81±0.04 | 0.801 | 1.02±0.07 | 1.11±0.14 | 1.05±0.09 | 0.85±0.04 | 0.107 |  |
| Vitamin B-6 (mg)                                 | 0.73±0.07 | 0.82±0.09 | 0.75±0.05 | 0.72±0.03 | 0.586 | 0.65±0.05 | 0.81±0.08 | 0.73±0.03 | 0.71±0.03 | 0.421 |  |
| Vitamin C (mg)                                   | 92.5±12.2 | 88.4±12.8 | 87.5±8.69 | 90.6±6.18 | 0.984 | 110±9.32  | 103±11.5  | 131±20.0  | 105±7.72  | 0.597 |  |
| Calcium (mg)                                     | 382±26.2  | 338±41.7  | 336±21.0  | 365±16.3  | 0.353 | 536±43.0  | 455±42.4  | 483±41.7  | 432±19.8  | 0.166 |  |
| Magnesium (mg)                                   | 139±7.34  | 141±12.1  | 143±6.63  | 145±3.84  | 0.907 | 167±9.06  | 157±7.87  | 159±9.59  | 147±4.55  | 0.142 |  |

All data weighted for unequal probability of sampling design by SUDAAN.  
ANOVA and chi-square were used for continuous and categories variables to test difference between the groups by gender.

Table 3. Health-related quality of life (SF-36) according to daily frequency eating-with-others by gender

|                                            | Daily frequency eating-with-others |           |           |           |         |           |           |           |           |         |
|--------------------------------------------|------------------------------------|-----------|-----------|-----------|---------|-----------|-----------|-----------|-----------|---------|
|                                            | Men                                |           |           |           |         | Women     |           |           |           |         |
|                                            | 0                                  | 1         | 2         | 3         | p value | 0         | 1         | 2         | 3         | p value |
| General health                             | 52.8±1.18                          | 52.0±1.49 | 52.9±1.10 | 51.5±0.50 | 0.538   | 47.1±0.99 | 48.6±1.23 | 49.7±1.24 | 49.0±0.84 | 0.211   |
| Mental health                              | 51.4±0.91                          | 49.3±1.88 | 52.3±1.13 | 52.5±0.50 | 0.222   | 47.8±1.30 | 47.3±1.45 | 48.8±1.27 | 49.2±1.02 | 0.542   |
| Physical functioning                       | 51.1±1.16                          | 50.4±1.26 | 53.3±0.68 | 51.5±0.65 | 0.044   | 45.2±0.96 | 50.7±0.97 | 48.2±1.03 | 47.0±0.64 | 0.002   |
| Body pain                                  | 51.2±1.20                          | 51.5±1.63 | 52.8±1.04 | 51.9±0.68 | 0.529   | 46.5±1.08 | 47.4±1.20 | 49.5±1.00 | 48.0±0.69 | 0.112   |
| Role limitations due to emotional problems | 50.0±1.19                          | 47.7±1.69 | 51.5±0.93 | 51.2±0.63 | 0.160   | 47.5±1.16 | 50.8±1.51 | 49.6±1.13 | 49.3±0.86 | 0.354   |
| Role limitations due to physical problems  | 50.2±1.36                          | 49.5±1.31 | 52.1±1.01 | 51.4±0.67 | 0.254   | 46.1±1.03 | 51.4±1.28 | 48.7±1.55 | 49.7±0.87 | 0.005   |
| Social function                            | 50.0±1.22                          | 49.4±1.71 | 51.9±0.99 | 50.9±0.67 | 0.262   | 48.2±1.17 | 48.6±1.31 | 50.0±1.31 | 49.0±0.71 | 0.698   |
| Vitality                                   | 51.0±1.32                          | 49.4±1.76 | 51.7±1.02 | 51.8±0.68 | 0.591   | 47.1±0.95 | 49.2±1.72 | 48.1±1.45 | 48.1±0.75 | 0.553   |

All data weighted for unequal probability of sampling design by SUDAAN.

ANOVA was used for continuous and categories variables to test difference between the groups by gender.

1  
2  
3  
4  
5  
6  
7  
8  
9  
10  
11  
12  
13  
14  
15  
16  
17  
18  
19  
20  
21  
22  
23  
24  
25  
26  
27  
28  
29  
30  
31  
32  
33  
34  
35  
36  
37  
38  
39  
40  
41  
42  
43  
44  
45  
46  
47  
48  
49

Table 4. Gender-specific hazard ratios (95% CI) of association between eating-with- others and risk of mortality on older adults

|                         | Daily frequency of eating-with-others |                  |                  |                  |        |                  |                  |                  |
|-------------------------|---------------------------------------|------------------|------------------|------------------|--------|------------------|------------------|------------------|
|                         | Men                                   |                  |                  |                  | Women  |                  |                  |                  |
|                         | 0                                     | 1                | 2                | 3                | 0      | 1                | 2                | 3                |
| Deceased/survival,<br>n | 75/67                                 | 26/31            | 37/89            | 248/382          | 60/114 | 20/59            | 36/104           | 196/350          |
| Crude model             | 1.00                                  | 0.90 (0.60–1.35) | 0.42 (0.28–0.61) | 0.67 (0.52–0.88) | 1.00   | 0.53 (0.27–1.05) | 0.68 (0.42–1.11) | 0.86 (0.64–1.16) |
| Model 1                 | 1.00                                  | 1.12 (0.71–1.78) | 0.48 (0.31–0.74) | 0.76 (0.57–1.03) | 1.00   | 0.54 (0.24–1.23) | 0.89 (0.53–1.49) | 1.07 (0.77–1.49) |
| Model 2 <sup>†</sup>    | 1.00                                  | 0.76 (0.37–1.56) | 0.43 (0.25–0.73) | 0.63 (0.41–0.98) | 1.00   | 0.56 (0.29–1.07) | 0.68 (0.35–1.30) | 0.69 (0.39–1.21) |
| Model 3 <sup>†</sup>    | 1.00                                  | 0.78 (0.39–1.55) | 0.46 (0.28–0.77) | 0.66 (0.43–1.02) | 1.00   | 0.54 (0.27–1.06) | 0.70 (0.36–1.36) | 0.72 (0.40–1.27) |

Data were weighted for unequal probability of sampling design by SUDAAN and estimated HR (95% CI) by using the Cox proportional hazard model.

Model 1: adjusted for age

Model 2: adjusted for age, education, strata, live alone, cook frequency, marital status, appetite status, dietary diversity score, activities of daily living and body mass index

Model 3: model 5 plus adjusted self-rate financial status

<sup>†</sup>Women were not adjusted for activities of daily living in the models since it is highly correlated with cooking frequency

A. Men

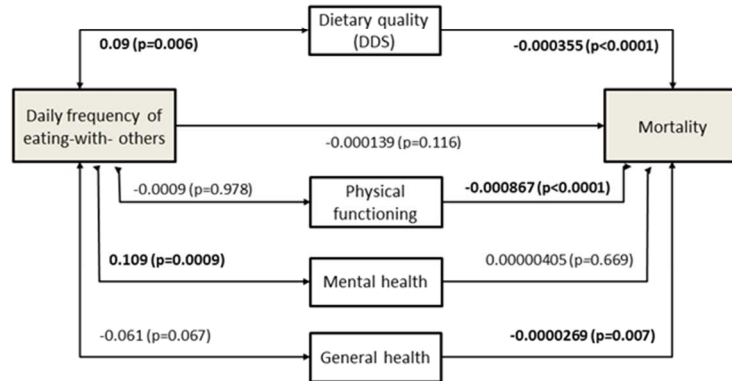

B. Women

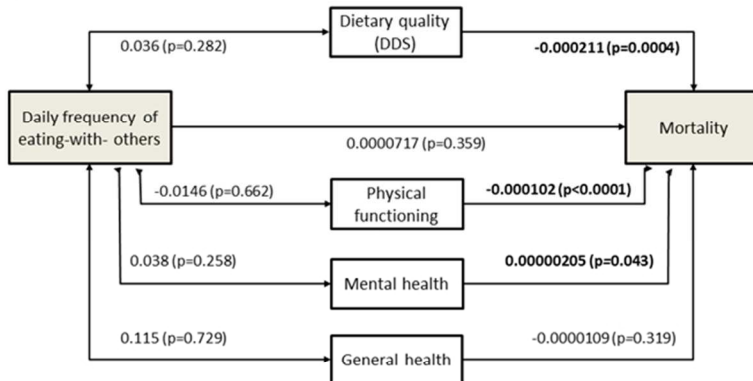

190x275mm (96 x 96 DPI)

# BMJ Open

## Gender differences in longevity in free-living older adults who eat-with-others: a prospective study in Taiwan

|                                 |                                                                                                                                                                                                                                                                                                                                                                                                                                                                                                                                                                                                                                    |
|---------------------------------|------------------------------------------------------------------------------------------------------------------------------------------------------------------------------------------------------------------------------------------------------------------------------------------------------------------------------------------------------------------------------------------------------------------------------------------------------------------------------------------------------------------------------------------------------------------------------------------------------------------------------------|
| Journal:                        | <i>BMJ Open</i>                                                                                                                                                                                                                                                                                                                                                                                                                                                                                                                                                                                                                    |
| Manuscript ID                   | bmjopen-2017-016575.R1                                                                                                                                                                                                                                                                                                                                                                                                                                                                                                                                                                                                             |
| Article Type:                   | Research                                                                                                                                                                                                                                                                                                                                                                                                                                                                                                                                                                                                                           |
| Date Submitted by the Author:   | 02-Jun-2017                                                                                                                                                                                                                                                                                                                                                                                                                                                                                                                                                                                                                        |
| Complete List of Authors:       | Huang, Yi-Chen; National Defense Medical Center, Graduate Institute of Life Sciences; National Defense Medical Center, School of Public Health<br>Cheng, Hsing-Ling ; Tri-Service General Hospital, The Department of Food and Nutrition<br>Wahlqvist, Mark; National Defense Medical Center, School of Public Health; National Health Research Institutes, Institute of Population Health Sciences<br>Lo, Yuan-Ting; National Defense Medical Center, School of Public Health<br>Lee, Meei-Shyuan; National Defense Medical Center, School of Public Health; National Defense Medical Center, Graduate Institute of Life Sciences |
| <b>Primary Subject Heading</b>: | Public health                                                                                                                                                                                                                                                                                                                                                                                                                                                                                                                                                                                                                      |
| Secondary Subject Heading:      | Nutrition and metabolism, Epidemiology, Geriatric medicine, Health policy                                                                                                                                                                                                                                                                                                                                                                                                                                                                                                                                                          |
| Keywords:                       | elderly, diet, mortality, social activities                                                                                                                                                                                                                                                                                                                                                                                                                                                                                                                                                                                        |
|                                 |                                                                                                                                                                                                                                                                                                                                                                                                                                                                                                                                                                                                                                    |

SCHOLARONE™  
Manuscripts

Only

1  
2  
3  
4 1 **TITLE PAGE**5  
6  
7 2 **Gender differences in longevity in free-living older adults who**  
8  
9 3 **eat-with-others: a prospective study in Taiwan**10  
11  
12 4  
13  
14  
15 5 Yi-Chen Huang<sup>1,2</sup>, Hsing-Ling Cheng<sup>3</sup>, Mark L Wahlqvist<sup>2,4,5</sup>, Yuan-Ting C Lo<sup>2</sup>, Meei-Shyuan  
16 6 Lee<sup>1,2,5\*</sup>17  
18 7  
19  
20 8 <sup>1</sup>Graduate Institute of Life Sciences, National Defense Medical Center, 161 Minchuan East  
21 9 Road, Sec. 6, Taipei, Taiwan 11490, Yi-Chen Huang Postdoctoral fellow, Meei-Shyuan Lee  
22 10 Professor23  
24  
25 11 <sup>2</sup>School of Public Health, National Defense Medical Center, 161 Minchuan East Road, Sec. 6,  
26 12 Taipei, Taiwan 11490, Mark L Wahlqvist Professor, Yuan-Ting C Lo Postdoctoral fellow,  
27 13 Yi-Chen Huang Postdoctoral fellow, Meei-Shyuan Lee Professor28  
29  
30 14 <sup>3</sup>The Department of Food and Nutrition, Tri-Service General Hospital, No. 325, Sec. 2,  
31 15 Chenggong Road, Neihu District, Taipei, Taiwan 11490, Taiwan, Hsing-Ling Cheng Dietitian32  
33 16 <sup>4</sup>Institute of Population Health Sciences, National Health Research Institutes, No. 5 Keyan  
34 17 Road, Miaoli County, Taiwan 350, Mark L Wahlqvist Professor35  
36  
37 18 <sup>5</sup>Monash Asia Institute, Monash University, Caulfield, VIC 3800, Australia, Mark L Wahlqvist  
38 19 Professor, Meei-Shyuan Lee Professor39  
40 20  
41  
42 21 **\*Correspondence to:** Prof Meei-Shyuan Lee, School of Public Health, National Defense  
43 22 Medical Center, 161 Minchuan East Road, Sec. 6, Taipei, Taiwan 11490.  
44 23 Email: mmsl@ndmctsgh.edu.tw; meeishyuan@gmail.com  
45 24 Phone and fax number: +886-2-8791070446  
47  
48 25  
49  
50 26 Word count: 3189 words (excluding title page, licence statement, abstract, references, figures  
51 27 and tables)

1  
2  
3  
4 28 **ABSTRACT**

5  
6 29 **Objectives:** Social activities such as 'eating-with-others' can positively affect the ageing  
7  
8  
9 30 process. We investigated the gender-specific association between eating arrangements and risk  
10  
11 31 of all-cause mortality among free-living older adults.

12  
13 32 **Setting:** A representative sample from the elderly Nutrition and Health Survey in Taiwan  
14  
15 33 during 1999-2000.

16  
17 34 **Participants:** Some 1,894 participants (955 men and 939 women) who aged  $\geq 65$  and  
18  
19 35 completed eating arrangement question as well as confirmed survivorship information.

20  
21 36 **Primary and secondary outcome measures:** Eating arrangements, health condition, and  
22  
23 37 24-hour dietary recall information were collected at baseline. We classified eating  
24  
25 38 arrangements as the daily frequency of eating-with-others (0–3). Survivorship was determined  
26  
27 39 by the National Death Registry until the end of 2008. Cox proportional-hazards regression was  
28  
29 40 used to assess the association between eating-with-others and mortality risk.

30  
31 41 **Results:** Overall, 63.1% of men and 56.4% of women ate with others 3 times a day. Both men  
32  
33 42 and women who ate with others were more likely to have higher meat and vegetable intakes,  
34  
35 43 and greater dietary quality than those who ate alone. The hazard ratios (HRs) (95% CI) for  
36  
37 44 all-cause mortality when eating-with-others 2 and 3 times daily were 0.46 (0.28–0.61), 0.67  
38  
39 45 (0.52–0.88) in men and 0.68 (0.42–1.11), 0.86 (0.64–1.16) in women, compared with those  
40  
41 46 who ate alone. Multivariable HRs (95% CI) were 0.43 (0.25–0.73), 0.63 (0.41–0.98) in men  
42  
43 47 and 0.68 (0.35–1.30), 0.69 (0.39–1.21) in women. With further adjustment for financial status,  
44  
45 48 HR was reduced by 54% in men who ate with others twice a day. Pathway analysis shows this  
46  
47 49 to be dependent on improved dietary quality by eating-with-others.

48  
49 50 **Conclusions:** Eating-with-others is an independent survival factor in older men. To providing  
50  
51 51 a social environment which encourages eating-with-others may benefit survival of older  
52  
53 52 people, especially for men.  
54  
55  
56  
57  
58  
59  
60

1  
2  
3  
4 53 **Key words:** elderly, diet, mortality, social activities  
5  
6 54

7  
8 55 **STRENGTHS AND LIMITATIONS OF THIS STUDY**  
9

- 10 56 ● Use of a representative free-living Taiwanese cohort with 10 years' follow-up for  
11 survival.  
12 57  
13 58 ● Study design provided an understanding of eating arrangements for older adults in a  
14 community setting.  
15 59  
16 60 ● A comprehensive assessment of the gender-specific associations between  
17 eating-with-others and mortality for older adults.  
18 61  
19 62 ● The frequency, but not duration of time spent eating alone or eating-with-others was  
20 considered.  
21 63  
22 64 ● Participants were mainly of Chinese ethnicity from Taiwan so that the generalisability of  
23 findings may be limited.  
24 65  
25 66



## 67 INTRODUCTION

68 Social engagement, such as interpersonal relations (e.g., contact and transactions with friends),  
69 exchange of information, and receiving and providing emotional support, is a key component  
70 of healthy ageing, besides avoiding disease and maintaining physical and cognitive functions.<sup>1</sup>  
71 However, opportunities to interact are frequently reduced after retirement because of factors  
72 such as loss of physical capacity, loss of mobility, and solitary living.

73 The word “Meal” means the event of eating and what is eaten. For this reason, social  
74 interaction is considered one of the criteria for a meal.<sup>2</sup> Numerous countries offer nutritional  
75 programs, such as congregate meals or meals-on-wheels programs, to encourage eating in a  
76 social setting.<sup>3</sup> The inverse correlation between eating-with-others and risk of depression has  
77 been studied extensively.<sup>4-7</sup> Additionally, eating alone can be analyzed as a separate risk factor  
78 from living alone with regard to depression or depressive symptoms.<sup>5,6</sup> Eating-with-others can  
79 potentially improve dietary quality, variety, and energy intake through social facilitation.<sup>8,9</sup>  
80 Depression and poor dietary quality increase the risk of chronic disease and mortality in older  
81 adults.<sup>10,11</sup> Solitary eating has been associated with a higher risk of mortality among small  
82 cohorts of elders in Botswana and the United States.<sup>12,13</sup> But, it is unclear whether the daily  
83 frequency of eating-with-others is associated with survivorship.

84 Gender is also a factor in the quality of older people’s lives; for example, women  
85 frequently exhibit more health-seeking behavior.<sup>14,15</sup> Yet men face higher risks of depression  
86 after widowhood than do women.<sup>16</sup> Exploring the gender-specific associations between  
87 solitary eating and mortality among older adults is potentially of public health value.

88 Providing simple, achievable steps for healthy ageing can prolong life, maintain quality  
89 of life over an extended duration, and limit physical deterioration, all of which are beneficial to  
90 public health. The purpose of this study was, therefore, to evaluate whether the daily frequency  
91 of eating-with-others is associated with all-cause mortality in a representative, free-living,

1  
2  
3  
4 92 Taiwanese cohort of older men and women.  
5  
6 93  
7  
8  
9 94

## 94 **SUBJECTS AND METHODS**

### 95 **Participants**

96 Participants aged 65 and over were recruited from the Elderly Nutrition and Health Survey in  
97 Taiwan during 1999–2000. The details of the survey design and sampling method have been  
98 published elsewhere.<sup>17</sup> In total, 1,937 older people completed face-to-face interviews with  
99 trained interviewers. We excluded 40 participants with incorrect identification or incorrect  
100 identity numbers and those who did not provide relevant or required information. After which  
101 1,894 participants (955 men and 939 women) remained in the study. Trained interviewers  
102 collected data on sociodemographics, dietary habits and intake, and disease history. All  
103 participants signed informed consent forms prior to being interviewed. This project was  
104 approved by the Ethics Committees of the National Health Research Institute and Academia  
105 Sinica, Taiwan.

### 107 **Eating arrangement**

108 Eating arrangements were assessed by asking participants whether they usually ate breakfast,  
109 lunch, and dinner with others. Their responses were recorded as one of the following four  
110 options: eat alone, eat with spouse, eat with children or relative(s), and eat with friend(s) or  
111 neighbor(s). We then classified the eating arrangements as eating-with-others 0 (eat alone), 1,  
112 2, 3 times a day.<sup>18</sup> Information was also obtained about the person responsible for meal  
113 preparation.

### 115 **Dietary assessment**

116 Information on frequency of dietary intake was collected using a validated simplified food

1  
2  
3  
4 117 frequency questionnaire.<sup>19</sup> Dietary quality and nutritional intake were measured through  
5  
6 118 one-day 24-hour dietary recall. The dietary quality was evaluated using the dietary diversity  
7  
8 119 score (DDS), which is based on the consumption of a half serving of the following six food  
9  
10 120 groups daily: grains; meat, fish, or eggs; dairy; vegetables; fruits; and oil or fat. The DDS  
11  
12 121 score ranges from 0 to 6, with a higher score representing higher dietary quality. The method  
13  
14 122 of nutrient intake calculation is described elsewhere.<sup>10</sup>  
15  
16  
17  
18  
19

#### 20 124 **Other variables**

21  
22 125 Participants were also asked how frequently they cooked or aided with cooking (excluding  
23  
24 126 ready-to-eat meals), and their responses were recorded as never, sometimes, often, or usually.  
25  
26 127 Participants were then asked how many people they lived with. The response “0” was defined  
27  
28 128 as living alone.

29  
30  
31 129 Health-related quality of life was measured by a 36 item Short Form (SF-36) in a  
32  
33 130 validated traditional Chinese version. A total of 8 dimensions of health, included physical  
34  
35 131 functioning, role limitations due to physical problems, mental health, role limitations due to  
36  
37 132 emotional problems, social function, bodily pain, vitality and general health. The score was  
38  
39 133 calculated by the norm-based scoring system ( $\mu=50$ ,  $\sigma=10$ ) and standardised. Higher scores  
40  
41 134 indicated a better quality of life.<sup>20</sup>

42  
43  
44 135 Disability was evaluated by activities of daily living (ADL) which included 9 questions  
45  
46 136 about self-care task difficulty in an older adult’s daily life. We used bioelectrical impedance  
47  
48 137 analysis to measure muscle mass. The skeletal muscle mass index was used to determine  
49  
50 138 sarcopenia status, calculated with the following equation:<sup>21</sup>

51  
52  
53 139  $[0.401 \times (\text{height}^2 / \text{resistance}) + (3.825 \times \text{gender}) - (0.071 \times \text{age}) + 5.102] / \text{height}^2$

54  
55 140 where height is measured in metres, resistance in Ohms, and age in years; men = 1 and  
56  
57 141 women = 0.

1  
2  
3  
4 142 The Charlson comorbidity index was used to assess multi-morbidity.<sup>22</sup> Cognitive function  
5  
6 143 was assessed by a validated Short Portable Mental Status Questionnaire (SPMSQ) in Chinese  
7  
8 144 which included 10 questions about orientation in time and place, personal history, long-term  
9  
10 145 and short-term memory and calculation. More than or equal to three erroneous responses was  
11  
12 146 regarded as cognitive impairment.<sup>23</sup>  
13  
14  
15  
16  
17

### 18 **Outcome ascertainment**

19  
20 149 National Death Registry data were obtained from Taiwan's Ministry of Health and Welfare.  
21  
22 150 We linked the NAHSIT dataset to the National Death Registry dataset using the participant ID  
23  
24 151 to determine survival rates. Follow-up time was calculated from date of interview to date of  
25  
26 152 death or until December 31, 2008.  
27  
28  
29

### 30 **Statistical analysis**

31  
32  
33 155 Categorical variables and continuous variables were presented as n (%) or mean  $\pm$  standard  
34  
35 156 errors (SE). Chi-square and ANOVA were used to determine the association between eating  
36  
37 157 arrangements and baseline characteristics for categorical or continuous variables, respectively.  
38  
39 158 The Cox proportional-hazards regression model was used to evaluate the association between  
40  
41 159 daily frequency eating-with-others and risk of all-cause mortality. Since the interaction  
42  
43 160 between eating arrangements and gender was significant ( $p=0.0093$ ), we used gender-specific  
44  
45 161 analyses. Additional factors were age, education level (illiterate, primary school, high school  
46  
47 162 and above), marital status (married, bereaved, other), region (Hakka, mountains, Eastern  
48  
49 163 Taiwan, Penghu, Northern Taiwan 1–3, Central Taiwan 1–3, Southern Taiwan 1–3), living  
50  
51 164 arrangement (live alone, live with others), BMI ( $<18.5$ ,  $18.5-23.9$ ,  $24.0-26.9$ ,  $\geq 27$ ), DDS ( $\leq 3$ ,  
52  
53 165 4, 5, 6), cooking frequency (never, sometimes, often, frequently), appetite status (good, fair,  
54  
55 166 poor), ADL and self-rate financial statue (more than enough, just enough, not enough). All  
56  
57  
58  
59  
60

1  
2  
3  
4 167 data analyses were performed using SAS 9.2 and SUDAAN 9.0 to adjust for the design effect of  
5  
6 168 sampling.  
7

8  
9 169 To explore the pathways which might connect eating-with-others to survival, we have  
10  
11 170 considered the intermediates of dietary quality (DDS), physical functioning, mental health,  
12  
13 171 and general health. The first linkage, using continuous variables, has been assessed by  
14  
15 172 Pearson's partial correlation coefficients. The second linkage to risk of mortality, as  
16  
17 173 coefficients, has been assessed by the Aalen additive hazards model.<sup>24</sup>  
18

19  
20 174

## 21 175 **RESULTS**

22  
23  
24 176 In total, 63.1% of men and 56.4% of women ate with others 3 times a day. For both genders,  
25  
26 177 those who ate with others were more likely to be younger, married, better financial status,  
27  
28 178 living with others, and less cooking than were those who ate alone. Men who ate alone had  
29  
30 179 significantly higher ADLs ( $p=0.004$ ) and cognitive impairment ( $p=0.005$ ) than those who ate  
31  
32 180 with others. (Table 1)  
33

34  
35 181 Table 2 presents the dietary quality and food intakes for daily frequency of  
36  
37 182 eating-with-others by gender. Those who ate alone had a poor dietary quality ( $DDS \leq 3$ ),  
38  
39 183 compared to those who ate with others 3 times daily. Men who ate alone ate less meat (1.02 vs.  
40  
41 184 1.30 times/d) and vegetables (1.90 vs. 2.47 times/d) than did those who ate with others 3  
42  
43 185 times a day ( $p<0.05$ ). Women who ate with others 3 times a day tended to eat more meat (1.13  
44  
45 186 vs 0.81 times/d), seafood (0.99 vs. 0.70 times/d), eggs (0.38 vs. 0.23 times/d), and vegetable  
46  
47 187 (2.52 vs. 2.09 times/d) intake than did those who ate alone ( $p<0.05$ ). Further, women who ate  
48  
49 188 alone had lower fat (24.7 vs. 28.9 g/1000 kcal/d) intakes, but higher carbohydrate (155 vs. 144  
50  
51 189 g/1000 kcal/d) intakes compared with those who ate with others ( $p<0.05$ ). Regarding meals,  
52  
53 190 around 58% to 60% of men and 68% to 74% of women prepared meals by themselves when  
54  
55 191 eating alone. Men were more likely to eat out when eating-with-others once a day compared  
56  
57  
58  
59  
60

1  
2  
3  
4 192 with women.

5  
6 193 Men who ate with others twice per day have significantly high physical functioning  
7  
8 194 compared with other groups ( $p=0.044$ ). For women, who ate with others once per day have  
9  
10 195 higher physical functioning (50.7 vs. 45.2) and role limitations due to physical problem (51.4  
11  
12 196 vs. 46.1) compared with those who ate alone. (Table 3)

13  
14  
15 197 Table 4 presents the association between daily frequency eating-with-others and risk of  
16  
17 198 all-cause mortality by gender. In the crude model, the HRs (95% CI) of risk of all-cause  
18  
19 199 mortality for who ate with others 2 or 3 times a day were 0.42 (0.28–0.61), 0.67 (0.52–0.88)  
20  
21 200 in men and 0.68 (0.42–1.11), 0.86 (0.64–1.16) in women compared with those who ate alone,  
22  
23 201 respectively. When adjusted for age, education, marital status, region, living arrangement,  
24  
25 202 cooking, appetite status, ADL, DDS, BMI, the HRs (95% CI) were 0.43 (0.25–0.73), 0.63  
26  
27 203 (0.41–0.98) for men and 0.68 (0.35–1.30), 0.69 (0.39–1.21) for women who ate with others 2  
28  
29 204 or 3 times a day. With further adjustment for financial status, the risk of mortality is reduced  
30  
31 205 by 54% (HR: 0.46, 95% CI: 0.28–0.77) and 44% (HR: 0.66, 95% CI: 0.43–1.02) for men who  
32  
33 206 ate with others 2 or 3 times a day.

34  
35  
36  
37 207 The pathway analyses are shown in Figure 1. For men, there are significant positive  
38  
39 208 associations between eating-with-others frequency and dietary quality (DDS) ( $p=0.006$ ) as  
40  
41 209 well as mental health ( $p=0.0009$ ). In turn, better dietary quality ( $p<0.0001$ ) is associated with  
42  
43 210 less mortality risk, as are physical functioning ( $p<0.0001$ ) and general health ( $p=0.007$ ). For  
44  
45 211 women, eating-with-others is not associated with any of dietary quality, physical functioning,  
46  
47 212 mental health or general health; however, dietary quality ( $p=0.0004$ ) and physical functioning  
48  
49 213 ( $p<0.0001$ ) are inversely associated with mortality risk, while mental health ( $p=0.043$ ) is  
50  
51 214 positively associated.

52  
53  
54  
55 215

## 56 57 216 **DISCUSSION**

1  
2  
3  
4 217 This study explored the gender-specific associations between eating arrangement and risk of  
5  
6 218 mortality by observing a population-representative older adult cohort with a 10-year follow-up  
7  
8 219 in an Asian country. Eating-with-others was inversely associated with risk of mortality, more  
9  
10 220 evident in men than in women.  
11

12  
13 221

### 14 15 222 **Food intake when eating-with-others**

16  
17 223 Eating-with-others has numerous beneficial effects on health. A randomized controlled trial at  
18  
19 224 a Dutch nursing home found that family-style meals that included the presence of others  
20  
21 225 increased the energy intake and reduced the prevalence of malnutrition. Those who ate with  
22  
23 226 others ate more than those who ate alone. Social eating may stimulate intake through extension  
24  
25 227 of meal duration and improved ambiance.<sup>8</sup> The presence of others in the household did not  
26  
27 228 affect energy intake, but the presence of others during mealtime did, with an average of 114  
28  
29 229 calories more per meal than those who ate alone.<sup>25</sup> Eating socially also improved dietary  
30  
31 230 quality and diversity.<sup>7,9</sup> However, the present study shows that after control for dietary quality  
32  
33 231 in the model, eating-with-others and mortality remains associated. A possible reason for this is  
34  
35 232 that solitary eating is often associated with depression,<sup>4-6</sup> in turn associated with mortality.  
36  
37 233 However, there may be value in solitude itself which would be an alternative interpretation of  
38  
39 234 the difference we have found in mortality risk reduction between eating twice and three times a  
40  
41 235 day with others by men.  
42  
43  
44  
45

46 236

### 47 48 237 **Eating-with-others and mortality**

49  
50 238 Our findings are consistent with several studies from Western countries. The Nutrition  
51  
52 239 Screening Initiative (NSI) checklist, a tool for malnutrition screening and awareness in older  
53  
54 240 adults in the US, asks questions regarding solitary eating. In a cohort study with 581  
55  
56 241 community-dwelling older adults, who ate more than 17 meals alone per week, exhibited a  
57  
58  
59  
60

10



1  
2  
3  
4 242 2.07-fold higher risk of mortality (RR=2.07, 95% CI=1.49–2.86) over an 8–12-year period.<sup>13</sup>

5  
6 243 Another study in Botswana found that older adults who ate alone had a higher risk of death

7  
8 244 (OR=6.7, 95% CI=2.2–20.0).<sup>12</sup> But, gender effect was unknown in these studies.

9  
10 245

### 11 12 13 246 **Eating alone and gender**

14  
15 247 In the present study, men who ate with others had a lower risk of mortality than did those who

16  
17 248 ate alone, for several probable reasons. Men who ate with others had better dietary quality and a

18  
19 249 higher vegetable intake than those eating alone. We also found that men who ate alone were

20  
21 250 more likely to eat out, not prepare meals by themselves, and frequently skip meals than did

22  
23 251 women. A Japanese cohort study discovered that men who ate alone were more likely to be

24  
25 252 underweight and skip meals and less likely to eat fruits and vegetables.<sup>9</sup> Underweight older

26  
27 253 adults with poor dietary quality and low fruit and vegetable intakes have been associated with a

28  
29 254 higher risk of mortality.<sup>10 26</sup> Furthermore, in our study, eating out is often associated with

30  
31 255 high-fat foods with poor quality. Men who were solitary eaters had low carbohydrate, protein,

32  
33 256 dietary fiber, and other nutrient intakes, but a higher fat intake than those who ate with others,

34  
35 257 although the differences were non-significant.

36  
37 258 Compared with Japan,<sup>9</sup> in our study men have a higher rate of solitary eating, but women

38  
39 259 have a lower rate. Taiwanese men who eat alone are more likely to be unmarried or live

40  
41 260 separately from their spouse. We found that the eating companionship of men who ate with

42  
43 261 others was usually their spouse or children rather than friends or neighbours (data not shown).

44  
45 262 Davis et al. found that dietary patterns of older men had stronger associations with living

46  
47 263 arrangements than did those of older women.<sup>27</sup> Cooking itself is a physical activity and a

48  
49 264 cognitive function,<sup>28</sup> and in Taiwanese culture women are more likely to prepare meals. Men

50  
51 265 eat out or buy ready-to-eat food more than they cook. In this study, men (47.0%) cooked less

52  
53 266 than did women (63.9%) when eating alone (Table 1). Men who ate alone shopped more than



1  
2  
3  
4 267 did women who ate alone (27.6% vs. 9.6%).  
5

6 268 It is also possible that what has been observed as a link between eating-with-others by  
7  
8 269 men and survival is part of a bigger picture of the role of marriage and men living with a  
9  
10 270 partner in their health outcomes and survival. It is well-documented that men who live with a  
11  
12 271 female partner live longer than those who do not.<sup>29 30</sup> This could be for any one or more of  
13  
14 272 several reasons which include having a carer, companionship or sharing of duties. A  
15  
16 273 correlation matrix (Supplementary table 1) shows that the greatest correlations with  
17  
18 274 eating-with-others are for marital status (positive), living alone (negative), and cooking  
19  
20 275 frequency (negative). In all three, the magnitude of the relationships is stronger for men.  
21  
22 276 These covariates are included in our models. We have identified marital status and cooking as  
23  
24 277 potential explanators for the difference in HRs between eating-with-others twice or three  
25  
26 278 times a day by men.  
27  
28  
29  
30

31 279

### 32 280 **Pathways from eating-with-others to survival**

33  
34 281 For men but not women, pathway analyses indicate that dietary quality, assessed as dietary  
35  
36 282 diversity, provides a potential connection between the social aspect of eating-with-others and  
37  
38 283 survival (Figure 1). This underscores the likely basic importance of nutritional factors in  
39  
40 284 life-long health, but draws attention to the social as well as the biomedical role of food in  
41  
42 285 health. For men, on pathway analysis, eating-with-others is associated with better mental  
43  
44 286 health. Since pathway analysis requires that all independent variables are continuous, this may  
45  
46 287 have resulted in an absence of a significant direct association of eating-with-others with  
47  
48 288 mortality due to its frequency not being linearly related to mortality; this contrasts with the  
49  
50 289 survival analyses by Cox regression (Table 4). In addition, by pathway analysis, each of  
51  
52 290 physical functioning and general health are themselves important in the prediction of  
53  
54 291 mortality risk in men. It remains conceivable that the dietary quality that men achieve,  
55  
56  
57  
58  
59  
60

12

1  
2  
3  
4 292 irrespective of eating-with-others, plays a role in each of physical functioning and general  
5  
6 293 health, which is evident in this population.<sup>10 20</sup>  
7

8 294 In the case of women, dietary quality directly and favourably predicts survival, but this  
9  
10 295 connection is not found to be dependent on eating-with-others. Perhaps women can achieve  
11  
12 296 the biomedical benefit of survival through diet without the need for its social function. In  
13  
14 297 addition, women have a more favourable survival with better physical functioning. Somewhat  
15  
16 298 surprisingly, better mental health is unfavourably associated with survival, although this is  
17  
18 299 weakly significant. It is possible that confounders that have not been considered in this  
19  
20 300 pathway analysis might account for this mental health association with mortality in older  
21  
22 301 women. For example, in devoting themselves to the care of others, or in dealing successfully  
23  
24 302 with a relative socio-economic disadvantage in widowhood, a sense of wellbeing may obtain,  
25  
26 303 while health adversity supervenes.  
27  
28  
29

30  
31 304

### 32 33 305 **Limitations**

34  
35 306 There are some limitations to this study. First, since the study participants were elderly, it can  
36  
37 307 be expected that a change in their eating arrangements would take place through time as  
38  
39 308 family and health circumstances change. Given that this is a single point survey (1999-2000),  
40  
41 309 varied follow-up times may alter the findings. However, we have performed analyses with  
42  
43 310 several follow-up times (<2, <4, <6 and ≥6 years) or the exclusion of events in the first and  
44  
45 311 second years (data not shown). For men, the point estimates for HRs eating-with-others twice  
46  
47 312 a day are consistently <1.00. But for women, low HRs of 0.15 are seen for eating-with-others  
48  
49 313 once a day in the first two years of observation, although not beyond. This does not change  
50  
51 314 our conclusions with the 10-year survival analysis. Second, the association may be affected by  
52  
53 315 the duration of time spent eating alone or eating-with-others, which was not considered. Third,  
54  
55 316 in Taiwanese society, older people are more likely to live with and depend on their families, so  
56  
57  
58  
59  
60

1  
2  
3  
4 317 the culturally specific nature of this study may limit its applicability elsewhere. The study  
5  
6 318 should be considered within a Taiwanese (of perhaps a broader Asian) context. As with cohort  
7  
8 319 studies in general, there may have been confounders not considered which might have  
9  
10 320 explained the associations presented. The study itself, however, has sought to consider the  
11  
12 321 circumstances of eating which are usually neglected in the exploration of food and nutrient  
13  
14 322 health relationships. The pathway analyses are an attempt to encompass more of the  
15  
16 323 explanatory models for these relationships by way of inclusion of physical, mental and general  
17  
18 324 health. The gender differences which are now recognised here and in other reports for the  
19  
20 325 respective health roles of dietary quality on the one hand, and with whom the food is consumed  
21  
22 326 on the other, are a challenge to more gender comprehensive public health policy.  
23  
24  
25  
26  
27

327

### 328 **Conclusions**

329 Eating socially may benefit survival in elderly men through the adjunct of dietary quality; it is  
330 also positively associated with men's mental health. For women, dietary quality is associated  
331 with survival advantage which is not apparently dependent on eating-with-others. The relative  
332 gender advantage in longevity that women have in this population is not adequately explained  
333 in the present study, except that they are likely to be the ones who eat with men who benefit  
334 from this social role of food. Thus, for men and women, the provision of a healthy social  
335 environment which increases social interactions should improve health outcomes.

336

### 337 **ACKNOWLEDGMENT**

338 The Elderly Nutrition and Health Survey (NAHSIT Elderly) in Taiwan 1997–2002 project  
339 was conducted by the Institute of Biomedical Sciences of Academia Sinica and the Research  
340 Center for the Humanities and Social Sciences, Center for Survey Research, Academia Sinica,  
341 directed by Wen-Harn Pan and Su-Hao Tu, and sponsored by the Taiwan Department of Health.

14

1  
2  
3  
4 342 This study is based in part on data from Department of Health and managed by the National  
5  
6 343 Health Research Institutes. The interpretation and conclusions contained herein do not  
7  
8 344 represent those of Department of Health, or National Health Research Institutes.  
9

10 345 None of the authors has any conflicts of interest to declare.  
11  
12 346

#### 13 14 15 347 **AUTHOR'S CONTRIBUTION** 16

17 348 YCH, HLC, MLW and MSL designed the study; YCH, HLC and YTCL performed statistical  
18  
19 349 analysis; YCH, MLW, YTCL, and MSL wrote the paper; MSL had primary responsibility for  
20  
21 350 the final content.  
22  
23  
24 351

#### 25 26 27 352 **COMPETING INTERESTS** 28

29 353 No author has any conflict of interest in regard to this paper.  
30  
31 354

#### 32 33 355 **FOUNDING** 34

35 356 This work was supported by the Ministry of Science and Technology grant number  
36  
37 357 MOST-103-2320-B-016-015-MY2, MOST105-2320-B-016 -008 and International Life  
38  
39 358 Sciences Institute (ILSI) Taiwan.  
40  
41 359

#### 42 43 44 360 **DATA SHARING STATEMENT** 45

46 361 No additional data are available.  
47  
48 362

#### 49 50 51 363 **ETHICS** 52

53 364 This project was approved by the Ethics Committees of the National Health Research Institute  
54  
55 365 and Academia Sinica, Taiwan.  
56  
57  
58  
59  
60

1  
2  
3  
4 366

5  
6 367 **COPYRIGHT/LICENSE FOR PUBLISH**

7  
8 368 “I Meei-Shyuan Lee The Corresponding Author of this article contained within the original  
9  
10 369 manuscript which includes any diagrams & photographs and any related or stand alone film  
11  
12 370 submitted (the Contribution”) has the right to grant on behalf of all authors and does grant on  
13  
14 371 behalf of all authors, a licence to the “BMJ Publishing Group Ltd” (“BMJ”) and its licensees,  
15  
16 372 to permit this Contribution (if accepted) to be published in any BMJ products and to exploit  
17  
18 373 all subsidiary rights, as set out in our licence set out at:

19  
20  
21 374 [http://group.bmj.com/products/journals/instructions-forauthors/wholly\\_owned\\_licence.pdf](http://group.bmj.com/products/journals/instructions-forauthors/wholly_owned_licence.pdf)

22  
23  
24 375

25  
26 376 **REFERENCES**

- 27  
28 377 1. Rowe JW, Kahn RL. Successful aging. *Gerontologist* 1997;37:433–40.
- 29  
30 378 2. Meiselman HL. Dimensions of the meal. *Journal of Foodservice* 2008;19:13–21. doi:  
31  
32 379 10.1111/j.1745-4506.2008.00076.x.
- 33  
34 380 3. Administration for Community Living, US Department of Health and Human Services.  
35  
36 381 Nutrition Services (OAA Title IIIC) - Congregate Nutrition Services Washington, DC:  
37  
38 382 Administration for Community Living, US Department of Health and Human Services;  
39  
40 383 2016 [cited 2016 18th April]. Available from:  
41  
42 384 [http://www.aoa.gov/AoA\\_programs/HPW/Nutrition\\_Services/index.aspx#congregate](http://www.aoa.gov/AoA_programs/HPW/Nutrition_Services/index.aspx#congregate)  
43  
44 385 accessed 18th April 2016.
- 45  
46 386 4. Kuroda A, Tanaka T, Hirano H, *et al.* Eating alone as social disengagement is strongly  
47  
48 387 associated with depressive symptoms in Japanese community-dwelling older adults. *J*  
49  
50 388 *Am Med Dir Assoc* 2015;16:578–85. doi: 10.1016/j.jamda.2015.01.078.
- 51  
52 389 5. Tani Y, Sasaki Y, Haseda M, *et al.* Eating alone and depression in older men and women  
53  
54 390 by cohabitation status: The JAGES longitudinal survey. *Age Ageing* 2015;44:1019-26.

55  
56  
57  
58  
59  
60 16

1  
2  
3  
4  
5  
6  
7  
8  
9  
10  
11  
12  
13  
14  
15  
16  
17  
18  
19  
20  
21  
22  
23  
24  
25  
26  
27  
28  
29  
30  
31  
32  
33  
34  
35  
36  
37  
38  
39  
40  
41  
42  
43  
44  
45  
46  
47  
48  
49  
50  
51  
52  
53  
54  
55  
56  
57  
58  
59  
60

- 391 doi: 10.1093/ageing/afv145.
- 392 6. Wang X, Shen W, Wang C, *et al.* Association between eating alone and depressive  
393 symptom in elders: a cross-sectional study. *BMC Geriatr* 2016;16:19. doi:  
394 10.1186/s12877-016-0197-2.
- 395 7. Kimura Y, Wada T, Okumiya K, *et al.* Eating alone among community-dwelling Japanese  
396 elderly: association with depression and food diversity. *J Nutr Health Aging*  
397 2012;16:728–31. doi: 10.1007/s12603-012-0067-3.
- 398 8. Nijs KA, de Graaf C, Siebelink E, *et al.* Effect of family-style meals on energy intake and  
399 risk of malnutrition in dutch nursing home residents: a randomized controlled trial. *J*  
400 *Gerontol A Biol Sci Med Sci* 2006;61:935–42.
- 401 9. Tani Y, Kondo N, Takagi D, *et al.* Combined effects of eating alone and living alone on  
402 unhealthy dietary behaviors, obesity and underweight in older Japanese adults: Results  
403 of the JAGES. *Appetite* 2015;95:1–8. doi: 10.1016/j.appet.2015.06.005.
- 404 10. Lee MS, Huang YC, Su HH, *et al.* A simple food quality index predicts mortality in  
405 elderly Taiwanese. *J Nutr Health Aging* 2011;15:815–21.
- 406 11. Schoevers RA, Geerlings MI, Beekman AT, *et al.* Association of depression and gender  
407 with mortality in old age. Results from the Amsterdam Study of the Elderly (AMSTEL).  
408 *Br J Psychiatry* 2000;177:336–42.
- 409 12. Clausen T, Wilson AO, Molebatsi RM, *et al.* Diminished mental- and physical function  
410 and lack of social support are associated with shorter survival in community dwelling  
411 older persons of Botswana. *BMC Public Health* 2007;7:144. doi:  
412 10.1186/1471-2458-7-144.
- 413 13. Sahyoun NR, Jacques PF, Dallal GE, *et al.* Nutrition Screening Initiative Checklist may  
414 be a better awareness/educational tool than a screening one. *J Am Diet Assoc*  
415 1997;97:760–4. doi: 10.1016/s0002-8223(97)00188-0.

- 1  
2  
3 416 14. Ek S. Gender differences in health information behaviour: a Finnish population-based  
4  
5 417 survey. *Health Promot Int* 2015;30:736–45. doi: 10.1093/heapro/dat063.  
6  
7 418 15. Redondo-Sendino A, Guallar-Castillon P, Banegas JR, *et al*. Gender differences in the  
8  
9 419 utilization of health-care services among the older adult population of Spain. *BMC*  
10  
11 420 *Public Health* 2006;6:155. doi: 10.1186/1471-2458-6-155.  
12  
13 421 16. Umberson D, Wortman CB, Kessler RC. Widowhood and depression: explaining  
14  
15 422 long-term gender differences in vulnerability. *J Health Soc Behav* 1992;33:10–24.  
16  
17 423 17. Wu SJ, Chang YH, Wei IL, *et al*. Intake levels and major food sources of energy and  
18  
19 424 nutrients in the Taiwanese elderly. *Asia Pac J Clin Nutr* 2005;14:211–20.  
20  
21 425 18. Cheng SL. Eating-with-others and the health of older people. School of Public Health.  
22  
23 426 National Defense Medical Center, 2014.  
24  
25 427 19. Huang YC, Lee MS, Pan WH, *et al*. Validation of a simplified food frequency  
26  
27 428 questionnaire as used in the Nutrition and Health Survey in Taiwan (NAHSIT) for the  
28  
29 429 elderly. *Asia Pac J Clin Nutr* 2011;20:134–40.  
30  
31 430 20. Lee MS, Chen RCY, Chang YH, *et al*. Physical function mitigates the adverse effects of  
32  
33 431 being thin on mortality in a freelifing older Taiwanese cohort. *J Nutr Health Aging*  
34  
35 432 2012;16:766–83.  
36  
37 433 21. Chuang S, Chang H, Lee M, *et al*. Skeletal muscle mass and risk of death in an elderly  
38  
39 434 population. *Nutr, Metab Cardiovasc Di* 2014;24:784–91.  
40  
41 435 22. Charlson ME, Pompei P, Ales KL, *et al*. A new method of classifying prognostic  
42  
43 436 comorbidity in longitudinal studies. Development and validation. *J Chronic Dis*  
44  
45 437 1987;40:373–83.  
46  
47 438 23. Chen RC, Chang YH, Lee MS, *et al*. Dietary quality may enhance survival related to  
48  
49 439 cognitive impairment in Taiwanese elderly. *Food Nutr Res* 2011;55 doi:  
50  
51 440 10.3402/fnr.v55i0.7387.  
52  
53  
54  
55  
56  
57  
58  
59  
60

1  
2  
3  
4  
5  
6  
7  
8  
9  
10  
11  
12  
13  
14  
15  
16  
17  
18  
19  
20  
21  
22  
23  
24  
25  
26  
27  
28  
29  
30  
31  
32  
33  
34  
35  
36  
37  
38  
39  
40  
41  
42  
43  
44  
45  
46  
47  
48  
49  
50  
51  
52  
53  
54  
55  
56  
57  
58  
59  
60

- 441 24. Gamborg M, Jensen GB, Sorensen TI, *et al.* Dynamic path analysis in life-course  
442 epidemiology. *Am J Epidemiol* 2011;173:1131–9. doi: 10.1093/aje/kwq502.
- 443 25. Locher JL, Robinson CO, Roth DL, *et al.* The effect of the presence of others on caloric  
444 intake in homebound older adults. *J Gerontol A Biol Sci Med Sci* 2005;60:1475-8.
- 445 26. Trichopoulou A, Kouris-Blazos A, Wahlqvist ML, *et al.* Diet and overall survival in  
446 elderly people. *BMJ* 1995;311:1457–60.
- 447 27. Davis MA, Randall E, Forthofer RN, *et al.* Living arrangements and dietary patterns of  
448 older adults in the United States. *J Gerontol* 1985;40:434-42.
- 449 28. Chen RC, Lee MS, Chang YH, *et al.* Cooking frequency may enhance survival in  
450 Taiwanese elderly. *Public Health Nutr* 2012;15:1142–9. doi:  
451 10.1017/s136898001200136x.
- 452 29. Ng TP, Jin A, Feng L, *et al.* Mortality of older persons living alone: Singapore  
453 Longitudinal Ageing Studies. *BMC Geriatr* 2015;15:126. doi:  
454 10.1186/s12877-015-0128-7.
- 455 30. Bowling A. Mortality after bereavement: a review of the literature on survival periods and  
456 factors affecting survival. *Soc Sci Med* 1987;24:117–24.



1  
2  
3 459 **LEGENDS**

4  
5 460 Figure 1. Pathway analysis for the associations of eating-with-others and all-cause mortality.

6  
7 461 All values are presented as  $\beta$  coefficients with their p values.

8  
9  
10 462

11  
12  
13  
14  
15  
16  
17  
18  
19  
20  
21  
22  
23  
24  
25  
26  
27  
28  
29  
30  
31  
32  
33  
34  
35  
36  
37  
38  
39  
40  
41  
42  
43  
44  
45  
46  
47  
48  
49  
50  
51  
52  
53  
54  
55  
56  
57  
58  
59  
60

For peer review only

Table 1. The baseline characteristics by daily frequency for eating-with-others

| Variables                            | Daily frequency for eating-with-others |           |           |           |           |         |           |           |           |           |           |         |
|--------------------------------------|----------------------------------------|-----------|-----------|-----------|-----------|---------|-----------|-----------|-----------|-----------|-----------|---------|
|                                      | Men                                    |           |           |           |           |         | Women     |           |           |           |           |         |
|                                      | Total                                  | 0         | 1         | 2         | 3         | p value | Total     | 0         | 1         | 2         | 3         | p value |
| N                                    |                                        | 142       | 57        | 126       | 630       |         |           | 174       | 79        | 140       | 546       |         |
| %                                    |                                        | 14.3      | 6.96      | 15.6      | 63.1      |         |           | 17.8      | 10.2      | 15.7      | 56.4      |         |
| Median of follow-up (yrs)            |                                        | 8.17      | 8.28      | 8.76      | 8.67      |         |           | 8.55      | 8.89      | 8.75      | 8.74      |         |
| Age at baseline (yrs)                | 72.9±0.33                              | 74.9±0.65 | 71.8±0.74 | 72.4±0.73 | 72.7±0.44 | 0.042   | 73.4±0.44 | 75.3±0.76 | 72.9±0.65 | 72.9±0.88 | 73.0±0.39 | 0.020   |
| Education                            |                                        |           |           |           |           | <0.0001 |           |           |           |           |           | 0.963   |
| Illiterate                           | 18.8                                   | 24.2      | 16.7      | 8.8       | 20.3      |         | 56.0      | 57.5      | 55.6      | 52.3      | 56.6      |         |
| Some up to primary school            | 46.6                                   | 52.3      | 43.5      | 48.4      | 45.2      |         | 32.3      | 32.5      | 32.0      | 33.8      | 31.9      |         |
| High school and above                | 34.7                                   | 23.5      | 39.9      | 42.8      | 34.5      |         | 11.7      | 10.0      | 12.4      | 13.8      | 11.5      |         |
| Marital status                       |                                        |           |           |           |           | <0.0001 |           |           |           |           |           | <0.0001 |
| Married                              | 78.6                                   | 36.1      | 48.2      | 75.0      | 92.5      |         | 49.48     | 15.5      | 19.6      | 37.8      | 68.8      |         |
| Bereaved                             | 14.3                                   | 37.8      | 38.8      | 17.5      | 5.43      |         | 48.12     | 80.6      | 71.1      | 60.7      | 30.3      |         |
| Others                               | 7.15                                   | 26.1      | 13.0      | 7.55      | 2.11      |         | 2.40      | 3.87      | 9.32      | 1.56      | 0.95      |         |
| Live alone                           | 13.7                                   | 60.4      | 0.00      | 9.67      | 1.47      | <0.0001 | 10.3      | 49.4      | 6.43      | 2.91      | 0.42      | <0.0001 |
| Whether enough money                 |                                        |           |           |           |           | 0.030   |           |           |           |           |           | 0.001   |
| More than enough                     | 78.4                                   | 71.8      | 79.9      | 85.8      | 77.8      |         | 75.0      | 64.1      | 63.1      | 78.3      | 79.5      |         |
| Just enough                          | 19.2                                   | 21.7      | 20.2      | 13.0      | 20.1      |         | 21.0      | 28.7      | 28.8      | 21.0      | 17.2      |         |
| Not enough                           | 2.46                                   | 6.52      | 0.00      | 1.26      | 2.14      |         | 4.01      | 7.23      | 8.13      | 0.70      | 3.25      |         |
| Smoker                               | 65.7                                   | 70.5      | 82.0      | 63.9      | 63.2      | 0.078   | 4.92      | 2.44      | 2.55      | 5.34      | 6.01      | 0.171   |
| Appetite status                      |                                        |           |           |           |           | 0.232   |           |           |           |           |           | 0.112   |
| Good                                 | 38.5                                   | 33.0      | 45.0      | 36.6      | 39.4      |         | 30.4      | 24.9      | 42.9      | 31.7      | 29.5      |         |
| Fair                                 | 55.5                                   | 62.5      | 41.5      | 59.4      | 54.5      |         | 59.4      | 57.2      | 48.8      | 61.5      | 61.4      |         |
| Poor                                 | 6.07                                   | 4.54      | 13.5      | 4.09      | 6.08      |         | 10.2      | 17.9      | 8.34      | 6.87      | 9.14      |         |
| Body mass index (kg/m <sup>2</sup> ) | 23.3±0.15                              | 22.9±0.46 | 23.2±0.64 | 23.2±0.33 | 23.3±0.17 | 0.738   | 23.9±0.25 | 23.3±0.56 | 25.1±0.43 | 24.5±0.50 | 23.8±0.28 | 0.0002  |
| < 18.5                               | 7.07                                   | 11.2      | 10.4      | 7.53      | 5.66      |         | 7.01      | 8.07      | 0.00      | 3.83      | 8.72      |         |
| 18.5–23.9                            | 52.5                                   | 54.1      | 53.4      | 50.6      | 52.6      |         | 44.0      | 51.0      | 39.6      | 40.9      | 43.6      |         |

|                                                 |           |           |           |           |           |         |           |           |           |           |           |         |
|-------------------------------------------------|-----------|-----------|-----------|-----------|-----------|---------|-----------|-----------|-----------|-----------|-----------|---------|
| 24.0–26.9                                       | 28.0      | 19.0      | 19.9      | 34.0      | 29.2      |         | 27.8      | 24.7      | 34.1      | 25.3      | 28.1      |         |
| ≥ 27.0                                          | 12.5      | 15.7      | 16.3      | 7.91      | 12.6      |         | 21.3      | 16.3      | 26.3      | 30.0      | 19.6      |         |
| Physical activity (MET/day)                     |           |           |           |           |           | 0.173   |           |           |           |           |           | 0.017   |
| <1.5                                            | 51.6      | 45.3      | 44.0      | 51.2      | 54.0      |         | 61.1      | 60.5      | 51.0      | 52.9      | 65.4      |         |
| 1.5–2.9                                         | 11.3      | 14.3      | 17.9      | 14.2      | 9.17      |         | 11.8      | 14.3      | 6.16      | 14.0      | 11.4      |         |
| ≥3                                              | 37.1      | 40.4      | 38.1      | 34.7      | 36.8      |         | 27.1      | 25.2      | 42.8      | 33.1      | 23.2      |         |
| Shopping                                        |           |           |           |           |           | 0.239   |           |           |           |           |           | 0.037   |
| <1/wk                                           | 43.8      | 34.2      | 44.5      | 45.9      | 45.5      |         | 54.9      | 65.3      | 46.6      | 50.9      | 54.3      |         |
| 1/wk                                            | 12.7      | 13.5      | 15.2      | 13.0      | 12.2      |         | 13.6      | 10.2      | 14.8      | 18.4      | 13.1      |         |
| 1–2/wk                                          | 23.3      | 24.7      | 21.0      | 19.6      | 24.2      |         | 19.8      | 14.9      | 24.7      | 22.0      | 19.8      |         |
| Everyday                                        | 20.2      | 27.6      | 19.3      | 21.6      | 18.3      |         | 11.7      | 9.63      | 13.9      | 8.74      | 12.9      |         |
| Current cooking activity                        |           |           |           |           |           | <0.0001 |           |           |           |           |           | 0.004   |
| Never                                           | 58.4      | 33.2      | 44.1      | 58.1      | 65.8      |         | 26.8      | 24.1      | 12.1      | 31.5      | 29.1      |         |
| Sometimes                                       | 20.3      | 13.1      | 19.2      | 24.8      | 20.8      |         | 13.2      | 5.10      | 9.1       | 16.0      | 15.8      |         |
| Often                                           | 6.83      | 6.63      | 11.4      | 9.63      | 5.66      |         | 10.5      | 6.94      | 20.0      | 12.6      | 9.23      |         |
| Usually                                         | 14.5      | 47.0      | 25.2      | 7.46      | 7.69      |         | 49.5      | 63.9      | 58.8      | 39.9      | 45.9      |         |
| Activities of daily living                      | 0.33±0.05 | 0.52±0.18 | 0.19±0.15 | 0.07±0.05 | 0.36±0.07 | 0.004   | 0.57±0.08 | 1.18±0.34 | 0.27±0.13 | 0.28±0.17 | 0.50±0.10 | 0.088   |
| Skeletal muscle mass index (kg/m <sup>2</sup> ) | 12.3±0.12 | 12.0±0.27 | 12.2±0.29 | 12.0±0.20 | 12.5±0.13 | 0.149   | 9.28±0.12 | 9.14±0.22 | 9.52±0.20 | 9.32±0.17 | 9.29±0.15 | 0.213   |
| Charlson comorbidity index                      | 4.71±0.20 | 5.20±0.48 | 4.22±0.39 | 4.85±0.61 | 4.62±0.20 | 0.365   | 4.77±0.21 | 5.06±0.51 | 4.74±0.59 | 4.21±0.29 | 4.84±0.24 | 0.142   |
| Self-perceived health status                    |           |           |           |           |           | 0.400   |           |           |           |           |           | <0.0001 |
| Excellent                                       | 4.55      | 7.12      | 7.46      | 1.23      | 4.47      |         | 2.58      | 2.88      | 0         | 3.14      | 2.80      |         |
| Very good                                       | 19.9      | 16.5      | 13.8      | 29.9      | 18.9      |         | 15.7      | 10.7      | 24.3      | 14.1      | 16.0      |         |
| Good                                            | 21.4      | 25.8      | 19.0      | 17.3      | 21.8      |         | 16.1      | 11.8      | 9.85      | 17.7      | 18.2      |         |
| Fair                                            | 41.1      | 38.2      | 40.3      | 40.7      | 41.9      |         | 48.3      | 47.9      | 56.7      | 50.4      | 46.2      |         |
| Poor                                            | 13.1      | 12.4      | 19.5      | 10.9      | 13.1      |         | 17.4      | 26.7      | 9.25      | 14.7      | 16.8      |         |
| Cognitive impairment                            | 8.81      | 12.6      | 1.82      | 3.10      | 10.2      | 0.005   | 27.4      | 30.9      | 25.9      | 30.4      | 25.8      | 0.751   |

All data weighted for unequal probability of sampling design by SUDAAN. Categorical variables are presented as n (%), and continuous variables are presented as mean±SE.

ANOVA and chi-square were used for continuous and categories variables to test difference between the groups by gender.

463

Table 2. Food, nutrient intakes and daily frequency of eating-with-others by gender

|                                                               | Daily frequency for eating-with-others |           |           |           |         |           |           |           |           |         |
|---------------------------------------------------------------|----------------------------------------|-----------|-----------|-----------|---------|-----------|-----------|-----------|-----------|---------|
|                                                               | Men                                    |           |           |           |         | Women     |           |           |           |         |
|                                                               | 0                                      | 1         | 2         | 3         | p value | 0         | 1         | 2         | 3         | p value |
| Food preparation, %                                           |                                        |           |           |           |         |           |           |           |           |         |
| Skipping meals                                                | 11.2                                   | 16.5      | 5.75      | 2.96      | 0.008   | 6.54      | 8.45      | 4.76      | 4.27      | 0.370   |
| Who prepared breakfast?                                       |                                        |           |           |           | <0.0001 |           |           |           |           | 0.003   |
| Self                                                          | 57.6                                   | 45.7      | 37.0      | 12.7      |         | 74.0      | 76.2      | 61.3      | 57.2      |         |
| Others                                                        | 28.6                                   | 36.4      | 56.1      | 85.8      |         | 23.9      | 20.7      | 36.1      | 41.5      |         |
| Eating out                                                    | 13.8                                   | 17.9      | 6.96      | 1.52      |         | 2.14      | 3.12      | 2.62      | 1.35      |         |
| Who prepared lunch?                                           |                                        |           |           |           | <0.0001 |           |           |           |           | 0.0001  |
| Self                                                          | 59.0                                   | 40.8      | 11.3      | 9.07      |         | 68.1      | 74.2      | 48.0      | 53.1      |         |
| Others                                                        | 31.3                                   | 34.9      | 85.0      | 89.0      |         | 26.3      | 18.1      | 50.0      | 45.2      |         |
| Eating out                                                    | 9.72                                   | 24.3      | 3.66      | 1.90      |         | 5.59      | 7.73      | 1.96      | 1.63      |         |
| Who prepared dinner?                                          |                                        |           |           |           | <0.0001 |           |           |           |           | 0.009   |
| Self                                                          | 60.0                                   | 25.0      | 6.20      | 8.52      |         | 67.7      | 60.1      | 44.6      | 51.4      |         |
| Others                                                        | 32.9                                   | 74.0      | 92.1      | 90.7      |         | 30.2      | 39.9      | 55.4      | 48.1      |         |
| Eating out                                                    | 7.05                                   | 1.03      | 1.73      | 0.76      |         | 2.11      | 0.00      | 0.00      | 0.51      |         |
| If you need to prepare meals for yourself, who gets the food? |                                        |           |           |           | <0.0001 |           |           |           |           | 0.118   |
| Never prepare                                                 | 6.21                                   | 15.8      | 9.38      | 9.32      |         | 8.37      | 1.67      | 5.24      | 6.60      |         |
| Self                                                          | 61.2                                   | 23.4      | 21.2      | 18.6      |         | 60.2      | 67.4      | 48.2      | 48.4      |         |
| Others                                                        | 32.6                                   | 60.8      | 69.5      | 72.1      |         | 31.4      | 31.0      | 46.6      | 45.0      |         |
| Dietary diversity score, mean±SE                              | 4.27±0.11                              | 4.13±0.17 | 4.57±0.11 | 4.61±0.06 | 0.003   | 4.28±0.13 | 4.32±0.14 | 4.69±0.10 | 4.46±0.06 | 0.009   |
| ≤3 (%)                                                        | 24.1                                   | 22.1      | 12.2      | 12.1      | 0.010   | 30.2      | 20.7      | 8.05      | 17.5      | 0.001   |
| 4 (%)                                                         | 30.0                                   | 41.4      | 30.2      | 32.4      |         | 24.1      | 31.2      | 31.5      | 31.3      |         |
| 5 (%)                                                         | 35.4                                   | 28.4      | 39.6      | 35.8      |         | 25.1      | 31.7      | 42.8      | 34.8      |         |

| 6 (%)                                            | 10.8      | 8.13      | 18.0      | 19.7      |       | 20.7      | 16.4      | 17.6      | 16.4      |       |
|--------------------------------------------------|-----------|-----------|-----------|-----------|-------|-----------|-----------|-----------|-----------|-------|
| Food intake other than cereal (times/d), mean±SE |           |           |           |           |       |           |           |           |           |       |
| Dairy                                            | 0.57±0.07 | 0.40±0.09 | 0.65±0.08 | 0.62±0.05 | 0.116 | 0.80±0.08 | 0.89±0.14 | 0.74±0.09 | 0.72±0.05 | 0.480 |
| Meat                                             | 1.02±0.09 | 1.98±0.08 | 1.59±0.19 | 1.30±0.07 | 0.001 | 0.81±0.15 | 0.86±0.16 | 1.20±0.16 | 1.13±0.08 | 0.017 |
| Seafood                                          | 0.86±0.18 | 0.93±0.12 | 1.08±0.12 | 0.99±0.08 | 0.524 | 0.70±0.10 | 0.92±0.12 | 0.91±0.09 | 0.99±0.07 | 0.026 |
| Egg                                              | 0.44±0.08 | 0.39±0.05 | 0.46±0.05 | 0.46±0.03 | 0.687 | 0.23±0.03 | 0.36±0.04 | 0.36±0.03 | 0.38±0.03 | 0.003 |
| Soy                                              | 0.48±0.09 | 0.43±0.06 | 0.47±0.06 | 0.45±0.04 | 0.824 | 0.39±0.06 | 0.50±0.10 | 0.61±0.07 | 0.51±0.05 | 0.063 |
| Vegetable                                        | 1.90±0.18 | 1.84±0.13 | 2.57±0.13 | 2.47±0.12 | 0.004 | 2.09±0.14 | 2.28±0.13 | 2.35±0.14 | 2.52±0.14 | 0.011 |
| Fruit                                            | 0.99±0.11 | 0.93±0.13 | 1.21±0.09 | 1.19±0.04 | 0.073 | 0.91±0.10 | 0.90±0.07 | 1.21±0.10 | 1.07±0.06 | 0.058 |
| Total energy intake (kcal), mean±SE              | 1833±100  | 1849±123  | 1871±118  | 1815±77.4 | 0.940 | 1327±92.6 | 1518±126  | 1500±58.7 | 1521±84.3 | 0.206 |
| Nutrient density (/1,000 kcal), mean±SE          |           |           |           |           |       |           |           |           |           |       |
| Carbohydrate (g)                                 | 132±4.79  | 137±5.21  | 139±2.58  | 139±2.71  | 0.438 | 155±3.55  | 143±5.63  | 144±3.31  | 144±1.82  | 0.028 |
| Dietary fiber (g)                                | 11.2±0.79 | 11.7±0.87 | 12.4±0.75 | 11.7±0.45 | 0.653 | 15.5±2.05 | 14.1±1.44 | 14.0±1.02 | 12.7±0.57 | 0.416 |
| Fat (g)                                          | 32.1±1.42 | 30.5±2.15 | 30.2±1.28 | 29.5±0.82 | 0.377 | 24.7±1.13 | 29.7±2.30 | 29.2±1.50 | 28.9±0.85 | 0.002 |
| Protein (g)                                      | 41.9±1.80 | 43.3±2.52 | 41.5±1.34 | 43.2±1.16 | 0.690 | 41.6±1.77 | 42.1±2.06 | 42.8±1.32 | 41.8±1.27 | 0.923 |
| Vitamin B-1 (mg)                                 | 0.63±0.06 | 0.78±0.07 | 0.69±0.04 | 0.70±0.03 | 0.645 | 0.71±0.08 | 0.69±0.05 | 0.76±0.07 | 0.66±0.03 | 0.449 |
| Vitamin B-2 (mg)                                 | 0.84±0.06 | 0.88±0.12 | 0.78±0.06 | 0.81±0.04 | 0.801 | 1.02±0.07 | 1.11±0.14 | 1.05±0.09 | 0.85±0.04 | 0.107 |
| Vitamin B-6 (mg)                                 | 0.73±0.07 | 0.82±0.09 | 0.75±0.05 | 0.72±0.03 | 0.586 | 0.65±0.05 | 0.81±0.08 | 0.73±0.03 | 0.71±0.03 | 0.421 |
| Vitamin C (mg)                                   | 92.5±12.2 | 88.4±12.8 | 87.5±8.69 | 90.6±6.18 | 0.984 | 110±9.32  | 103±11.5  | 131±20.0  | 105±7.72  | 0.597 |
| Calcium (mg)                                     | 382±26.2  | 338±41.7  | 336±21.0  | 365±16.3  | 0.353 | 536±43.0  | 455±42.4  | 483±41.7  | 432±19.8  | 0.166 |
| Magnesium (mg)                                   | 139±7.34  | 141±12.1  | 143±6.63  | 145±3.84  | 0.907 | 167±9.06  | 157±7.87  | 159±9.59  | 147±4.55  | 0.142 |

All data weighted for unequal probability of sampling design by SUDAAN.

ANOVA and chi-square were used for continuous and categories variables to test difference between the groups by gender.

464

Table 3. Health-related quality of life (SF-36) according to daily frequency eating-with-others by gender

|                                            | Daily frequency eating-with-others |           |           |           |         |           |           |           |           |         |
|--------------------------------------------|------------------------------------|-----------|-----------|-----------|---------|-----------|-----------|-----------|-----------|---------|
|                                            | Men                                |           |           |           |         | Women     |           |           |           |         |
|                                            | 0                                  | 1         | 2         | 3         | p value | 0         | 1         | 2         | 3         | p value |
| General health                             | 52.8±1.18                          | 52.0±1.49 | 52.9±1.10 | 51.5±0.50 | 0.538   | 47.1±0.99 | 48.6±1.23 | 49.7±1.24 | 49.0±0.84 | 0.211   |
| Mental health                              | 51.4±0.91                          | 49.3±1.88 | 52.3±1.13 | 52.5±0.50 | 0.222   | 47.8±1.30 | 47.3±1.45 | 48.8±1.27 | 49.2±1.02 | 0.542   |
| Physical functioning                       | 51.1±1.16                          | 50.4±1.26 | 53.3±0.68 | 51.5±0.65 | 0.044   | 45.2±0.96 | 50.7±0.97 | 48.2±1.03 | 47.0±0.64 | 0.002   |
| Body pain                                  | 51.2±1.20                          | 51.5±1.63 | 52.8±1.04 | 51.9±0.68 | 0.529   | 46.5±1.08 | 47.4±1.20 | 49.5±1.00 | 48.0±0.69 | 0.112   |
| Role limitations due to emotional problems | 50.0±1.19                          | 47.7±1.69 | 51.5±0.93 | 51.2±0.63 | 0.160   | 47.5±1.16 | 50.8±1.51 | 49.6±1.13 | 49.3±0.86 | 0.354   |
| Role limitations due to physical problems  | 50.2±1.36                          | 49.5±1.31 | 52.1±1.01 | 51.4±0.67 | 0.254   | 46.1±1.03 | 51.4±1.28 | 48.7±1.55 | 49.7±0.87 | 0.005   |
| Social function                            | 50.0±1.22                          | 49.4±1.71 | 51.9±0.99 | 50.9±0.67 | 0.262   | 48.2±1.17 | 48.6±1.31 | 50.0±1.31 | 49.0±0.71 | 0.698   |
| Vitality                                   | 51.0±1.32                          | 49.4±1.76 | 51.7±1.02 | 51.8±0.68 | 0.591   | 47.1±0.95 | 49.2±1.72 | 48.1±1.45 | 48.1±0.75 | 0.553   |

All data weighted for unequal probability of sampling design by SUDAAN.

ANOVA was used for continuous and categories variables to test difference between the groups by gender.

465

466

Table 4. Gender-specific hazard ratios (95% CI) of association between eating-with-others and risk of mortality in older adults

|                         | Daily frequency of eating-with-others |                     |                        |                       |        |                     |                     |                     |
|-------------------------|---------------------------------------|---------------------|------------------------|-----------------------|--------|---------------------|---------------------|---------------------|
|                         | Men                                   |                     |                        |                       | Women  |                     |                     |                     |
|                         | 0                                     | 1                   | 2                      | 3                     | 0      | 1                   | 2                   | 3                   |
| Deceased/survival,<br>n | 75/67                                 | 26/31               | 37/89                  | 248/382               | 60/114 | 20/59               | 36/104              | 196/350             |
| Crude model             | 1.00                                  | 0.90<br>(0.60–1.35) | 0.42***<br>(0.28–0.61) | 0.67**<br>(0.52–0.88) | 1.00   | 0.53<br>(0.27–1.05) | 0.68<br>(0.42–1.11) | 0.86<br>(0.64–1.16) |
| Model 1                 | 1.00                                  | 1.12<br>(0.71–1.78) | 0.48**<br>(0.31–0.74)  | 0.76<br>(0.57–1.03)   | 1.00   | 0.54<br>(0.24–1.23) | 0.89<br>(0.53–1.49) | 1.07<br>(0.77–1.49) |
| Model 2 <sup>†</sup>    | 1.00                                  | 0.76<br>(0.37–1.56) | 0.43**<br>(0.25–0.73)  | 0.63*<br>(0.41–0.98)  | 1.00   | 0.56<br>(0.29–1.07) | 0.68<br>(0.35–1.30) | 0.69<br>(0.39–1.21) |
| Model 3 <sup>†</sup>    | 1.00                                  | 0.78<br>(0.39–1.55) | 0.46**<br>(0.28–0.77)  | 0.66<br>(0.43–1.02)   | 1.00   | 0.54<br>(0.27–1.06) | 0.70<br>(0.36–1.36) | 0.72<br>(0.40–1.27) |

Data were weighted for unequal probability of sampling design by SUDAAN and estimated HR (95% CI) by using the Cox proportional-hazard model.

Model 1: adjusted for age

Model 2: adjusted for age, education, strata, live alone, cook frequency, marital status, appetite status, dietary diversity score, activities of daily living and body mass index

Model 3: model 2 plus adjusted self-rate financial status

<sup>†</sup>Women were not adjusted for activities of daily living in the models since it is highly correlated with cooking frequency.

\*p<0.05; \*\* p<0.01; \*\*\* p<0.001

467

468

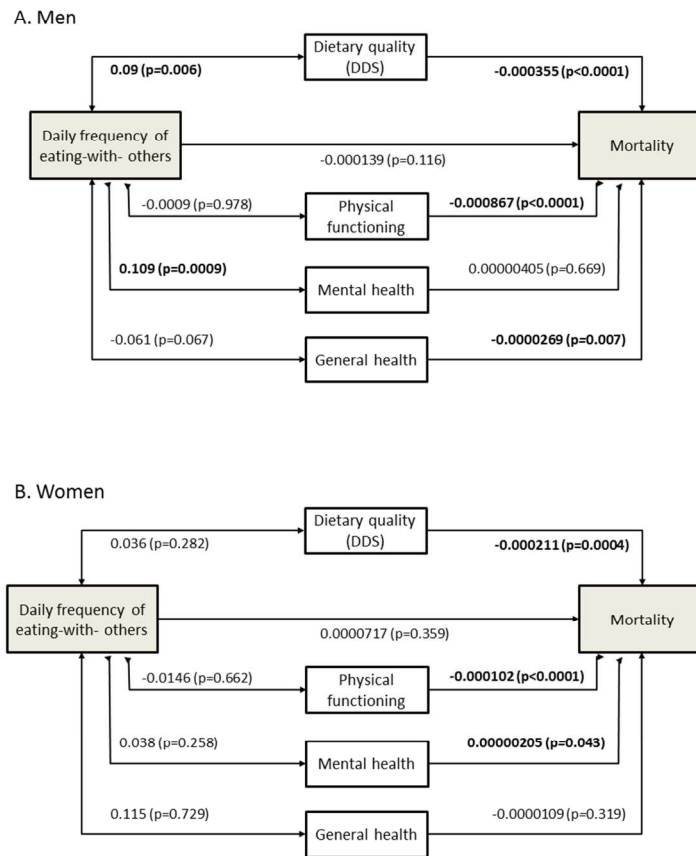

Figure 1. Pathway analysis for the associations of eating-with-others and all-cause mortality. All values are presented as  $\beta$  coefficients with their p values.

297x420mm (300 x 300 DPI)



Supplementary table 1. Spearman rank correlation coefficients between daily frequency of eating with others and co-variables

|                                                | Spearman rank correlation coefficients |                       |
|------------------------------------------------|----------------------------------------|-----------------------|
|                                                | Men                                    | Women                 |
| Education – higher                             | 0.067 <sup>*</sup>                     | 0.037                 |
| Marital status – married                       | 0.522 <sup>***</sup>                   | 0.460 <sup>***</sup>  |
| Dietary diversity score – higher               | 0.092 <sup>**</sup>                    | 0.033                 |
| Body mass index – higher                       | 0.037                                  | 0.025                 |
| Age – older                                    | -0.092 <sup>**</sup>                   | -0.127 <sup>**</sup>  |
| Live alone                                     | -0.648 <sup>***</sup>                  | -0.592 <sup>***</sup> |
| Cooking frequency – more                       | -0.407 <sup>***</sup>                  | -0.157 <sup>***</sup> |
| Appetite status – poor                         | -0.035                                 | -0.01                 |
| Activities of daily living – more difficulties | -0.037                                 | -0.087 <sup>**</sup>  |
| Self-rate financial status – not enough        | -0.066 <sup>*</sup>                    | -0.124 <sup>**</sup>  |

\*p<0.05; \*\*p<0.001; \*\*\*p<0.0001

## STROBE Statement—checklist of items that should be included in reports of observational studies

|                              | Item No | Recommendation                                                                                                                                                                                                                                                                                                                                                                                                                                                         | Page      |
|------------------------------|---------|------------------------------------------------------------------------------------------------------------------------------------------------------------------------------------------------------------------------------------------------------------------------------------------------------------------------------------------------------------------------------------------------------------------------------------------------------------------------|-----------|
| <b>Title and abstract</b>    | 1       | (a) Indicate the study's design with a commonly used term in the title or the abstract                                                                                                                                                                                                                                                                                                                                                                                 | 1         |
|                              |         | (b) Provide in the abstract an informative and balanced summary of what was done and what was found                                                                                                                                                                                                                                                                                                                                                                    | 2         |
| <b>Introduction</b>          |         |                                                                                                                                                                                                                                                                                                                                                                                                                                                                        |           |
| Background/rationale         | 2       | Explain the scientific background and rationale for the investigation being reported                                                                                                                                                                                                                                                                                                                                                                                   | 4         |
| Objectives                   | 3       | State specific objectives, including any prespecified hypotheses                                                                                                                                                                                                                                                                                                                                                                                                       | 4-5       |
| <b>Methods</b>               |         |                                                                                                                                                                                                                                                                                                                                                                                                                                                                        |           |
| Study design                 | 4       | Present key elements of study design early in the paper                                                                                                                                                                                                                                                                                                                                                                                                                | 5-7       |
| Setting                      | 5       | Describe the setting, locations, and relevant dates, including periods of recruitment, exposure, follow-up, and data collection                                                                                                                                                                                                                                                                                                                                        | 5-7       |
| Participants                 | 6       | (a) <i>Cohort study</i> —Give the eligibility criteria, and the sources and methods of selection of participants. Describe methods of follow-up<br><i>Case-control study</i> —Give the eligibility criteria, and the sources and methods of case ascertainment and control selection. Give the rationale for the choice of cases and controls<br><i>Cross-sectional study</i> —Give the eligibility criteria, and the sources and methods of selection of participants | 5, 7      |
|                              |         | (b) <i>Cohort study</i> —For matched studies, give matching criteria and number of exposed and unexposed<br><i>Case-control study</i> —For matched studies, give matching criteria and the number of controls per case                                                                                                                                                                                                                                                 |           |
| Variables                    | 7       | Clearly define all outcomes, exposures, predictors, potential confounders, and effect modifiers. Give diagnostic criteria, if applicable                                                                                                                                                                                                                                                                                                                               | 5-7       |
| Data sources/<br>measurement | 8*      | For each variable of interest, give sources of data and details of methods of assessment (measurement). Describe comparability of assessment methods if there is more than one group                                                                                                                                                                                                                                                                                   | 5-7       |
| Bias                         | 9       | Describe any efforts to address potential sources of bias                                                                                                                                                                                                                                                                                                                                                                                                              | 13        |
| Study size                   | 10      | Explain how the study size was arrived at                                                                                                                                                                                                                                                                                                                                                                                                                              | N/A       |
| Quantitative variables       | 11      | Explain how quantitative variables were handled in the analyses. If applicable, describe which groupings were chosen and why                                                                                                                                                                                                                                                                                                                                           | 5,<br>6-7 |
| Statistical methods          | 12      | (a) Describe all statistical methods, including those used to control for confounding                                                                                                                                                                                                                                                                                                                                                                                  | 7-8       |
|                              |         | (b) Describe any methods used to examine subgroups and interactions                                                                                                                                                                                                                                                                                                                                                                                                    | 7         |
|                              |         | (c) Explain how missing data were addressed                                                                                                                                                                                                                                                                                                                                                                                                                            | 5         |
|                              |         | (d) <i>Cohort study</i> —If applicable, explain how loss to follow-up was addressed<br><i>Case-control study</i> —If applicable, explain how matching of cases and controls was addressed<br><i>Cross-sectional study</i> —If applicable, describe analytical methods taking account of sampling strategy                                                                                                                                                              | 5         |
|                              |         | (e) Describe any sensitivity analyses                                                                                                                                                                                                                                                                                                                                                                                                                                  | 13        |

Continued on next page

**Results**

|                  |     |                                                                                                                                                                                                              |                  |
|------------------|-----|--------------------------------------------------------------------------------------------------------------------------------------------------------------------------------------------------------------|------------------|
| Participants     | 13* | (a) Report numbers of individuals at each stage of study—eg numbers potentially eligible, examined for eligibility, confirmed eligible, included in the study, completing follow-up, and analysed            | 5                |
|                  |     | (b) Give reasons for non-participation at each stage                                                                                                                                                         | 5                |
|                  |     | (c) Consider use of a flow diagram                                                                                                                                                                           | N/A              |
| Descriptive data | 14* | (a) Give characteristics of study participants (eg demographic, clinical, social) and information on exposures and potential confounders                                                                     | 8-9<br>(Table 1) |
|                  |     | (b) Indicate number of participants with missing data for each variable of interest                                                                                                                          | 5                |
|                  |     | (c) <i>Cohort study</i> —Summarise follow-up time (eg, average and total amount)                                                                                                                             | Table 1          |
| Outcome data     | 15* | <i>Cohort study</i> —Report numbers of outcome events or summary measures over time                                                                                                                          | Table 4          |
|                  |     | <i>Case-control study</i> —Report numbers in each exposure category, or summary measures of exposure                                                                                                         |                  |
|                  |     | <i>Cross-sectional study</i> —Report numbers of outcome events or summary measures                                                                                                                           |                  |
| Main results     | 16  | (a) Give unadjusted estimates and, if applicable, confounder-adjusted estimates and their precision (eg, 95% confidence interval). Make clear which confounders were adjusted for and why they were included | 9<br>(Table 4)   |
|                  |     | (b) Report category boundaries when continuous variables were categorized                                                                                                                                    | 7                |
|                  |     | (c) If relevant, consider translating estimates of relative risk into absolute risk for a meaningful time period                                                                                             | N/A              |
| Other analyses   | 17  | Report other analyses done—eg analyses of subgroups and interactions, and sensitivity analyses                                                                                                               | 7                |

**Discussion**

|                  |    |                                                                                                                                                                            |    |
|------------------|----|----------------------------------------------------------------------------------------------------------------------------------------------------------------------------|----|
| Key results      | 18 | Summarise key results with reference to study objectives                                                                                                                   | 10 |
| Limitations      | 19 | Discuss limitations of the study, taking into account sources of potential bias or imprecision. Discuss both direction and magnitude of any potential bias                 | 13 |
| Interpretation   | 20 | Give a cautious overall interpretation of results considering objectives, limitations, multiplicity of analyses, results from similar studies, and other relevant evidence | 14 |
| Generalisability | 21 | Discuss the generalisability (external validity) of the study results                                                                                                      | 14 |

**Other information**

|         |    |                                                                                                                                                               |    |
|---------|----|---------------------------------------------------------------------------------------------------------------------------------------------------------------|----|
| Funding | 22 | Give the source of funding and the role of the funders for the present study and, if applicable, for the original study on which the present article is based | 15 |
|---------|----|---------------------------------------------------------------------------------------------------------------------------------------------------------------|----|

\*Give information separately for cases and controls in case-control studies and, if applicable, for exposed and unexposed groups in cohort and cross-sectional studies.

**Note:** An Explanation and Elaboration article discusses each checklist item and gives methodological background and published examples of transparent reporting. The STROBE checklist is best used in conjunction with this article (freely available on the Web sites of PLoS Medicine at <http://www.plosmedicine.org/>, Annals of Internal Medicine at <http://www.annals.org/>, and Epidemiology at <http://www.epidem.com/>). Information on the STROBE Initiative is available at [www.strobe-statement.org](http://www.strobe-statement.org).

# BMJ Open

## Gender differences in longevity in free-living older adults who eat-with-others: a prospective study in Taiwan

|                                 |                                                                                                                                                                                                                                                                                                                                                                                                                                                                                                                                                                                                                                    |
|---------------------------------|------------------------------------------------------------------------------------------------------------------------------------------------------------------------------------------------------------------------------------------------------------------------------------------------------------------------------------------------------------------------------------------------------------------------------------------------------------------------------------------------------------------------------------------------------------------------------------------------------------------------------------|
| Journal:                        | <i>BMJ Open</i>                                                                                                                                                                                                                                                                                                                                                                                                                                                                                                                                                                                                                    |
| Manuscript ID                   | bmjopen-2017-016575.R2                                                                                                                                                                                                                                                                                                                                                                                                                                                                                                                                                                                                             |
| Article Type:                   | Research                                                                                                                                                                                                                                                                                                                                                                                                                                                                                                                                                                                                                           |
| Date Submitted by the Author:   | 26-Jul-2017                                                                                                                                                                                                                                                                                                                                                                                                                                                                                                                                                                                                                        |
| Complete List of Authors:       | Huang, Yi-Chen; National Defense Medical Center, Graduate Institute of Life Sciences; National Defense Medical Center, School of Public Health<br>Cheng, Hsing-Ling ; Tri-Service General Hospital, The Department of Food and Nutrition<br>Wahlqvist, Mark; National Defense Medical Center, School of Public Health; National Health Research Institutes, Institute of Population Health Sciences<br>Lo, Yuan-Ting; National Defense Medical Center, School of Public Health<br>Lee, Meei-Shyuan; National Defense Medical Center, School of Public Health; National Defense Medical Center, Graduate Institute of Life Sciences |
| <b>Primary Subject Heading</b>: | Public health                                                                                                                                                                                                                                                                                                                                                                                                                                                                                                                                                                                                                      |
| Secondary Subject Heading:      | Nutrition and metabolism, Epidemiology, Geriatric medicine, Health policy                                                                                                                                                                                                                                                                                                                                                                                                                                                                                                                                                          |
| Keywords:                       | elderly, diet, mortality, social activities                                                                                                                                                                                                                                                                                                                                                                                                                                                                                                                                                                                        |
|                                 |                                                                                                                                                                                                                                                                                                                                                                                                                                                                                                                                                                                                                                    |

SCHOLARONE™  
Manuscripts

Only

1  
2  
3  
4 1 **TITLE PAGE**5  
6  
7 2 **Gender differences in longevity in free-living older adults who**  
8  
9 3 **eat-with-others: a prospective study in Taiwan**10  
11  
12 4  
13  
14  
15 5 Yi-Chen Huang<sup>1,2</sup>, Hsing-Ling Cheng<sup>3</sup>, Mark L Wahlqvist<sup>2,4,5</sup>, Yuan-Ting C Lo<sup>2</sup>, Meei-Shyuan  
16 6 Lee<sup>1,2,5\*</sup>17  
18 7  
19  
20 8 <sup>1</sup>Graduate Institute of Life Sciences, National Defense Medical Center, 161 Minchuan East  
21 9 Road, Sec. 6, Taipei, Taiwan 11490, Yi-Chen Huang Postdoctoral fellow, Meei-Shyuan Lee  
22 10 Professor23  
24  
25 11 <sup>2</sup>School of Public Health, National Defense Medical Center, 161 Minchuan East Road, Sec. 6,  
26 12 Taipei, Taiwan 11490, Mark L Wahlqvist Professor, Yuan-Ting C Lo Postdoctoral fellow,  
27 13 Yi-Chen Huang Postdoctoral fellow, Meei-Shyuan Lee Professor28  
29  
30 14 <sup>3</sup>The Department of Food and Nutrition, Tri-Service General Hospital, No. 325, Sec. 2,  
31 15 Chenggong Road, Neihu District, Taipei, Taiwan 11490, Taiwan, Hsing-Ling Cheng Dietitian32  
33 16 <sup>4</sup>Institute of Population Health Sciences, National Health Research Institutes, No. 5 Keyan  
34 17 Road, Miaoli County, Taiwan 350, Mark L Wahlqvist Professor35  
36  
37 18 <sup>5</sup>Monash Asia Institute, Monash University, Caulfield, VIC 3800, Australia, Mark L Wahlqvist  
38 19 Professor, Meei-Shyuan Lee Professor39  
40 20  
41  
42 21 **\*Correspondence to:** Prof Meei-Shyuan Lee, School of Public Health, National Defense  
43 22 Medical Center, 161 Minchuan East Road, Sec. 6, Taipei, Taiwan 11490.  
44 23 Email: mmsl@ndmctsgh.edu.tw; meeishyuan@gmail.com  
45 24 Phone and fax number: +886-2-8791070446  
47  
48 25  
49  
50 26 Word count: 3132 words (excluding title page, licence statement, abstract, references, figures  
51 27 and tables)

1  
2  
3  
4 28 **ABSTRACT**

5  
6 29 **Objectives:** Social activities such as ‘eating-with-others’ can positively affect the ageing  
7  
8  
9 30 process. We investigated the gender-specific association between eating arrangements and risk  
10  
11 31 of all-cause mortality among free-living older adults.

12  
13 32 **Setting:** A representative sample from the elderly Nutrition and Health Survey in Taiwan  
14  
15 33 during 1999-2000.

16  
17 34 **Participants:** Some 1,894 participants (955 men and 939 women) who aged  $\geq 65$  and  
18  
19 35 completed eating arrangement question as well as confirmed survivorship information.

20  
21 36 **Primary and secondary outcome measures:** Eating arrangements, health condition, and  
22  
23 37 24-hour dietary recall information were collected at baseline. We classified eating  
24  
25 38 arrangements as the daily frequency of eating-with-others (0–3). Survivorship was determined  
26  
27 39 by the National Death Registry until the end of 2008. Cox proportional-hazards regression was  
28  
29 40 used to assess the association between eating-with-others and mortality risk.

30  
31 41 **Results:** Overall, 63.1% of men and 56.4% of women ate with others 3 times a day. Both men  
32  
33 42 and women who ate with others were more likely to have higher meat and vegetable intakes,  
34  
35 43 and greater dietary quality than those who ate alone. The hazard ratios (HRs) (95% CI) for  
36  
37 44 all-cause mortality when eating-with-others 2 and 3 times daily were 0.46 (0.28–0.61), 0.67  
38  
39 45 (0.52–0.88) in men and 0.68 (0.42–1.11), 0.86 (0.64–1.16) in women, compared with those  
40  
41 46 who ate alone. Multivariable HRs (95% CI) adjusted for sociodemographic, nutritional and  
42  
43 47 “activities of daily living” covariates were 0.43 (0.25–0.73), 0.63 (0.41–0.98) in men and 0.68  
44  
45 48 (0.35–1.30), 0.69 (0.39–1.21) in women. With further adjustment for financial status, HR was  
46  
47 49 reduced by 54% in men who ate with others twice a day. Pathway analysis shows this to be  
48  
49 50 dependent on improved dietary quality by eating-with-others.

50  
51 51 **Conclusions:** Eating-with-others is an independent survival factor in older men. To providing  
52  
53 52 a social environment which encourages eating-with-others may benefit survival of older  
54  
55  
56  
57  
58  
59  
60

1  
2  
3  
4 53 people, especially for men.  
5

6 54 **Key words:** elderly, diet, mortality, social activities  
7  
8

9 55

10  
11 56 **STRENGTHS AND LIMITATIONS OF THIS STUDY**

12  
13 57 ● Use of a representative free-living Taiwanese cohort with 10 years' follow-up for  
14  
15 58 survival.

16  
17 59 ● Study design provided an understanding of eating arrangements for older adults in a  
18  
19 60 community setting.

20  
21 61 ● A comprehensive assessment of the gender-specific associations between  
22  
23 62 eating-with-others and mortality for older adults.

24  
25 63 ● The frequency, but not duration of time spent eating alone or eating-with-others was  
26  
27 64 considered.

28  
29 65 ● Participants were mainly of Chinese ethnicity from Taiwan so that the generalisability of  
30  
31 66 findings may be limited.  
32  
33  
34

35 67  
36  
37  
38  
39  
40  
41  
42  
43  
44  
45  
46  
47  
48  
49  
50  
51  
52  
53  
54  
55  
56  
57  
58  
59  
60

## 68 INTRODUCTION

69 Social engagement, such as interpersonal relations (e.g., contact and transactions with friends),  
70 exchange of information, and receiving and providing emotional support, is a key component  
71 of healthy ageing, besides avoiding disease and maintaining physical and cognitive functions.<sup>1</sup>  
72 However, opportunities to interact are frequently reduced after retirement because of factors  
73 such as loss of physical capacity, loss of mobility, and solitary living.

74 The word “Meal” means the event of eating and what is eaten. For this reason, social  
75 interaction is considered one of the criteria for a meal.<sup>2</sup> Numerous countries offer nutritional  
76 programs, such as congregate meals or meals-on-wheels programs, to encourage eating in a  
77 social setting.<sup>3</sup> The inverse correlation between eating-with-others and risk of depression has  
78 been studied extensively.<sup>4-7</sup> Additionally, eating alone can be analyzed as a separate risk factor  
79 from living alone with regard to depression or depressive symptoms.<sup>5,6</sup> Eating-with-others can  
80 potentially improve dietary quality, variety, and energy intake through social facilitation.<sup>8,9</sup>  
81 Depression and poor dietary quality increase the risk of chronic disease and mortality in older  
82 adults.<sup>10,11</sup> Solitary eating has been associated with a higher risk of mortality among small  
83 cohorts of elders in Botswana and the United States.<sup>12,13</sup> But, it is unclear whether the daily  
84 frequency of eating-with-others is associated with survivorship.

85 Gender is also a factor in the quality of older people’s lives; for example, women  
86 frequently exhibit more health-seeking behavior.<sup>14,15</sup> Yet men face higher risks of depression  
87 after widowhood than do women.<sup>16</sup> Exploring the gender-specific associations between  
88 solitary eating and mortality among older adults is potentially of public health value.

89 Providing simple, achievable steps for healthy ageing can prolong life, maintain quality  
90 of life over an extended duration, and limit physical deterioration, all of which are beneficial to  
91 public health. The purpose of this study was, therefore, to evaluate whether the daily frequency  
92 of eating-with-others is associated with all-cause mortality in a representative, free-living,



1  
2  
3  
4 93 Taiwanese cohort of older men and women.  
5  
6  
7

8  
9  
10  
11 94

## 12 95 **SUBJECTS AND METHODS**

### 13 96 **Participants**

14 97 Participants aged 65 and over were recruited from the Elderly Nutrition and Health Survey in  
15 98 Taiwan during 1999–2000. The details of the survey design and sampling method have been  
16 99 published elsewhere.<sup>17</sup> In total, 1,937 older people completed face-to-face interviews with  
17 100 trained interviewers. We excluded 40 participants with incorrect identification or incorrect  
18 101 identity numbers and those who did not provide relevant or required information. After which  
19 102 1,894 participants (955 men and 939 women) remained in the study. Trained interviewers  
20 103 collected data on sociodemographics, dietary habits and intake, and disease history. All  
21 104 participants signed informed consent forms prior to being interviewed. This project was  
22 105 approved by the Ethics Committees of the National Health Research Institute and Academia  
23 106 Sinica, Taiwan.  
24  
25  
26  
27  
28  
29  
30  
31  
32  
33  
34  
35  
36  
37  
38  
39  
40  
41  
42  
43  
44  
45  
46  
47  
48  
49  
50  
51  
52  
53  
54  
55  
56  
57  
58  
59  
60

107

### 108 **Eating arrangement**

109 Eating arrangements were assessed by asking participants whether they usually ate breakfast,  
110 lunch, and dinner with others. Their responses were recorded as one of the following four  
111 options: eat alone, eat with spouse, eat with children or relative(s), and eat with friend(s) or  
112 neighbor(s). We then classified the eating arrangements as eating-with-others 0 (eat alone), 1,  
113 2, 3 times a day.<sup>18</sup> Information was also obtained about the person responsible for meal  
114 preparation.

115

### 116 **Dietary assessment**

117 Information on frequency of dietary intake was collected using a validated simplified food

1  
2  
3  
4 118 frequency questionnaire.<sup>19</sup> Dietary quality and nutritional intake were measured through  
5  
6 119 one-day 24-hour dietary recall. The dietary quality was evaluated using the dietary diversity  
7  
8 120 score (DDS), which is based on the consumption of a half serving of the following six food  
9  
10 121 groups daily: grains; meat, fish, or eggs; dairy; vegetables; fruits; and oil or fat. The DDS  
11  
12 122 score ranges from 0 to 6, with a higher score representing higher dietary quality. The method  
13  
14 123 of nutrient intake calculation is described elsewhere.<sup>10</sup>  
15  
16  
17  
18  
19

### 20 **Other variables**

21  
22 126 Participants were also asked how frequently they cooked or aided with cooking (excluding  
23  
24 127 ready-to-eat meals), and their responses were recorded as never, sometimes, often, or usually.  
25  
26 128 Participants were then asked how many people they lived with. The response “0” was defined  
27  
28 129 as living alone.

30  
31 130 Health-related quality of life was measured by a 36 item Short Form (SF-36) in a  
32  
33 131 validated traditional Chinese version. A total of 8 dimensions of health, included physical  
34  
35 132 functioning, role limitations due to physical problems, mental health, role limitations due to  
36  
37 133 emotional problems, social function, bodily pain, vitality and general health. The score was  
38  
39 134 calculated by the norm-based scoring system ( $\mu=50$ ,  $\sigma=10$ ) and standardised. Higher scores  
40  
41 135 indicated a better quality of life.<sup>20</sup>  
42  
43

44 136 Disability was evaluated by activities of daily living (ADL) which included 9 questions  
45  
46 137 about self-care task difficulty in an older adult’s daily life. We used bioelectrical impedance  
47  
48 138 analysis to measure muscle mass. The skeletal muscle mass index was used to determine  
49  
50 139 sarcopenia status, calculated with the following equation:<sup>21</sup>

$$51 \quad [0.401 \times (\text{height}^2 / \text{resistance}) + (3.825 \times \text{gender}) - (0.071 \times \text{age}) + 5.102] / \text{height}^2$$

52  
53 140 where height is measured in metres, resistance in Ohms, and age in years; men = 1 and  
54  
55 141 women = 0.  
56  
57  
58  
59  
60

1  
2  
3  
4 143 The Charlson comorbidity index was used to assess multi-morbidity.<sup>22</sup> Cognitive function  
5  
6 144 was assessed by a validated Short Portable Mental Status Questionnaire (SPMSQ) in Chinese  
7  
8 145 which included 10 questions about orientation in time and place, personal history, long-term  
9  
10 146 and short-term memory and calculation. More than or equal to three erroneous responses was  
11  
12 147 regarded as cognitive impairment.<sup>23</sup>  
13  
14  
15  
16  
17

### 18 149 **Outcome ascertainment**

19  
20 150 National Death Registry data were obtained from Taiwan's Ministry of Health and Welfare.  
21  
22 151 We linked the NAHSIT dataset to the National Death Registry dataset using the participant ID  
23  
24 152 to determine survival rates. Follow-up time was calculated from date of interview to date of  
25  
26 153 death or until December 31, 2008.  
27  
28  
29

### 30 155 **Statistical analysis**

31  
32  
33 156 Categorical variables and continuous variables were presented as n (%) or mean  $\pm$  standard  
34  
35 157 errors (SE). Chi-square and ANOVA were used to determine the association between eating  
36  
37 158 arrangements and baseline characteristics for categorical or continuous variables, respectively.  
38  
39 159 The Cox proportional-hazards regression model was used to evaluate the association between  
40  
41 160 daily frequency eating-with-others and risk of all-cause mortality. Since the interaction  
42  
43 161 between eating arrangements and gender was significant ( $p=0.0093$ ), we used gender-specific  
44  
45 162 analyses. Additional factors were age, education level, marital status, region, living  
46  
47 163 arrangement, BMI, DDS, cooking frequency, appetite status, ADL and self-rate financial  
48  
49 164 status. All data analyses were performed using SAS 9.2 and SUDAAN 9.0 to adjust for the  
50  
51 165 design effect of sampling.  
52  
53  
54

55 166 To explore the pathways which might connect eating-with-others to survival, we have  
56  
57 167 considered the intermediates of dietary quality (DDS), physical functioning, mental health,  
58  
59  
60

1  
2  
3  
4 168 and general health. The first linkage, using continuous variables, has been assessed by  
5  
6 169 Pearson's partial correlation coefficients. The second linkage to risk of mortality, as  
7  
8 170 coefficients, has been assessed by the Aalen additive hazards model.<sup>24</sup>  
9  
10 171

## 11 12 13 172 **RESULTS**

14  
15 173 In total, 63.1% of men and 56.4% of women ate with others 3 times a day. For both genders,  
16  
17 174 those who ate with others were more likely to be younger, married, better financial status,  
18  
19 175 living with others, and less cooking than were those who ate alone. Men who ate alone had  
20  
21 176 significantly higher ADLs ( $p=0.004$ ) and cognitive impairment ( $p=0.005$ ) than those who ate  
22  
23 177 with others. (Table 1)

24  
25  
26 178 Table 2 presents the dietary quality and food intakes for daily frequency of  
27  
28 179 eating-with-others by gender. Those who ate alone had a poor dietary quality ( $DDS \leq 3$ ),  
29  
30 180 compared to those who ate with others 3 times daily. Men who ate alone ate less meat (1.02 vs.  
31  
32 181 1.30 times/d) and vegetables (1.90 vs. 2.47 times/d) than did those who ate with others 3  
33  
34 182 times a day ( $p<0.05$ ). Women who ate with others 3 times a day tended to eat more meat (1.13  
35  
36 183 vs 0.81 times/d), seafood (0.99 vs. 0.70 times/d), eggs (0.38 vs. 0.23 times/d), and vegetable  
37  
38 184 (2.52 vs. 2.09 times/d) intake than did those who ate alone ( $p<0.05$ ). Further, women who ate  
39  
40 185 alone had lower fat (24.7 vs. 28.9 g/1000 kcal/d) intakes, but higher carbohydrate (155 vs. 144  
41  
42 186 g/1000 kcal/d) intakes compared with those who ate with others ( $p<0.05$ ). Regarding meals,  
43  
44 187 around 58% to 60% of men and 68% to 74% of women prepared meals by themselves when  
45  
46 188 eating alone. Men were more likely to eat out when eating-with-others once a day compared  
47  
48 189 with women.

49  
50  
51  
52  
53 190 Men who ate with others twice per day have significantly high physical functioning  
54  
55 191 compared with other groups ( $p=0.044$ ). For women, who ate with others once per day have  
56  
57 192 higher physical functioning (50.7 vs. 45.2) and role limitations due to physical problem (51.4  
58  
59  
60

1  
2  
3  
4 193 vs. 46.1) compared with those who ate alone. (Table 3)

5  
6 194 Table 4 presents the association between daily frequency eating-with-others and risk of  
7  
8 195 all-cause mortality by gender. In the crude model, the HRs (95% CI) of risk of all-cause  
9  
10 196 mortality for who ate with others 2 or 3 times a day were 0.42 (0.28–0.61), 0.67 (0.52–0.88)  
11  
12 197 in men and 0.68 (0.42–1.11), 0.86 (0.64–1.16) in women compared with those who ate alone,  
13  
14 198 respectively. When adjusted for age, education, marital status, region, living arrangement,  
15  
16 199 cooking, appetite status, ADL, DDS, BMI, the HRs (95% CI) were 0.43 (0.25–0.73), 0.63  
17  
18 200 (0.41–0.98) for men and 0.68 (0.35–1.30), 0.69 (0.39–1.21) for women who ate with others 2  
19  
20 201 or 3 times a day. With further adjustment for financial status, the risk of mortality is reduced  
21  
22 202 by 54% (HR: 0.46, 95% CI: 0.28–0.77) and 34% (HR: 0.66, 95% CI: 0.43–1.02) for men who  
23  
24 203 ate with others 2 or 3 times a day.  
25  
26  
27

28 204 The pathway analyses are shown in Figure 1. For men, there are significant positive  
29  
30 205 associations between eating-with-others frequency and dietary quality (DDS) ( $p=0.006$ ) as  
31  
32 206 well as mental health ( $p=0.0009$ ). In turn, better dietary quality ( $p<0.0001$ ) is associated with  
33  
34 207 less mortality risk, as are physical functioning ( $p<0.0001$ ) and general health ( $p=0.007$ ). For  
35  
36 208 women, eating-with-others is not associated with any of dietary quality, physical functioning,  
37  
38 209 mental health or general health; however, dietary quality ( $p=0.0004$ ) and physical functioning  
39  
40 210 ( $p<0.0001$ ) are inversely associated with mortality risk, while mental health ( $p=0.043$ ) is  
41  
42 211 positively associated.  
43  
44  
45

46 212

## 47 48 213 **DISCUSSION**

49  
50 214 This study explored the gender-specific associations between eating arrangement and risk of  
51  
52 215 mortality by observing a population-representative older adult cohort with a 10-year follow-up  
53  
54 216 in an Asian country. Eating-with-others was inversely associated with risk of mortality, more  
55  
56 217 evident in men than in women.  
57  
58  
59  
60

1  
2  
3  
4 218

5  
6 219 **Food intake when eating-with-others**

7  
8 220 Eating-with-others has numerous beneficial effects on health. A randomized controlled trial at  
9  
10 221 a Dutch nursing home found that family-style meals that included the presence of others  
11  
12 222 increased the energy intake and reduced the prevalence of malnutrition. Those who ate with  
13  
14 223 others ate more than those who ate alone. Social eating may stimulate intake through extension  
15  
16 224 of meal duration and improved ambiance.<sup>8</sup> The presence of others in the household did not  
17  
18 225 affect energy intake, but the presence of others during mealtime did, with an average of 114  
19  
20 226 calories more per meal than those who ate alone.<sup>25</sup> Eating socially also improved dietary  
21  
22 227 quality and diversity.<sup>7,9</sup> However, the present study shows that after control for dietary quality  
23  
24 228 in the model, eating-with-others and mortality remains associated. A possible reason for this is  
25  
26 229 that solitary eating is often associated with depression,<sup>4,6</sup> in turn associated with mortality.  
27  
28 230 However, there may be value in solitude itself which would be an alternative interpretation of  
29  
30 231 the difference we have found in mortality risk reduction between eating twice and three times a  
31  
32 232 day with others by men.  
33  
34  
35  
36  
37  
38

39 233

40 234 **Eating-with-others and mortality**

41 235 Our findings are consistent with several studies from Western countries. The Nutrition  
42  
43 236 Screening Initiative (NSI) checklist, a tool for malnutrition screening and awareness in older  
44  
45 237 adults in the US, asks questions regarding solitary eating. In a cohort study with 581  
46  
47 238 community-dwelling older adults, who ate more than 17 meals alone per week, exhibited a  
48  
49 239 2.07-fold higher risk of mortality (RR=2.07, 95% CI=1.49–2.86) over an 8–12-year period.<sup>13</sup>  
50  
51 240 Another study in Botswana found that older adults who ate alone had a higher risk of death  
52  
53 241 (OR=6.7, 95% CI=2.2–20.0).<sup>12</sup> But, gender effect was unknown in these studies.  
54  
55  
56  
57  
58  
59  
60

242

1  
2  
3  
4 243 **Eating alone and gender**  
5

6 244 In the present study, men who ate with others had a lower risk of mortality than did those who  
7  
8 245 ate alone, for several probable reasons. Men who ate with others had better dietary quality and a  
9  
10 246 higher vegetable intake than those eating alone. We also found that men who ate alone were  
11  
12 247 more likely to eat out, not prepare meals by themselves, and frequently skip meals than did  
13  
14  
15 248 women. A Japanese cohort study discovered that men who ate alone were more likely to be  
16  
17 249 underweight and skip meals and less likely to eat fruits and vegetables.<sup>9</sup> Underweight older  
18  
19 250 adults with poor dietary quality and low fruit and vegetable intakes have been associated with a  
20  
21 251 higher risk of mortality.<sup>10 26</sup> Furthermore, in our study, eating out is often associated with  
22  
23 252 high-fat foods with poor quality. Men who were solitary eaters had low carbohydrate, protein,  
24  
25 253 dietary fiber, and other nutrient intakes, but a higher fat intake than those who ate with others,  
26  
27  
28 254 although the differences were non-significant.

29  
30 255 Compared with Japan,<sup>9</sup> in our study men have a higher rate of solitary eating, but women  
31  
32 256 have a lower rate. Taiwanese men who eat alone are more likely to be unmarried or live  
33  
34 257 separately from their spouse. We found that the eating companionship of men who ate with  
35  
36 258 others was usually their spouse or children rather than friends or neighbours (data not shown).  
37  
38 259 Davis et al. found that dietary patterns of older men had stronger associations with living  
39  
40 260 arrangements than did those of older women.<sup>27</sup> Cooking itself is a physical activity and a  
41  
42 261 cognitive function,<sup>28</sup> and in Taiwanese culture women are more likely to prepare meals. Men  
43  
44 262 eat out or buy ready-to-eat food more than they cook. In this study, men (47.0%) cooked less  
45  
46 263 than did women (63.9%) when eating alone (Table 1). Men who ate alone shopped more than  
47  
48 264 did women who ate alone (27.6% vs. 9.6%).

49  
50  
51  
52 265 It is also possible that what has been observed as a link between eating-with-others by  
53  
54 266 men and survival is part of a bigger picture of the role of marriage and men living with a  
55  
56 267 partner in their health outcomes and survival. It is well-documented that men who live with a



1  
2  
3  
4 268 female partner live longer than those who do not.<sup>29 30</sup> This could be for any one or more of  
5  
6 269 several reasons which include having a carer, companionship or sharing of duties. A  
7  
8 270 correlation matrix (Supplementary table 1) shows that the greatest correlations with  
9  
10 271 eating-with-others are for marital status (positive), living alone (negative), and cooking  
11  
12 272 frequency (negative). In all three, the magnitude of the relationships is stronger for men.  
13  
14 273 These covariates are included in our models. We have identified marital status and cooking as  
15  
16 274 potential explanators for the difference in HRs between eating-with-others twice or three  
17  
18 275 times a day by men.  
19  
20  
21  
22

### 23 24 277 **Pathways from eating-with-others to survival**

25  
26 278 For men but not women, pathway analyses indicate that dietary quality, assessed as dietary  
27  
28 279 diversity, provides a potential connection between the social aspect of eating-with-others and  
29  
30 280 survival (Figure 1). This underscores the likely basic importance of nutritional factors in  
31  
32 281 life-long health, but draws attention to the social as well as the biomedical role of food in  
33  
34 282 health. For men, on pathway analysis, eating-with-others is associated with better mental  
35  
36 283 health. Since pathway analysis requires that all independent variables are continuous, this may  
37  
38 284 have resulted in an absence of a significant direct association of eating-with-others with  
39  
40 285 mortality due to its frequency not being linearly related to mortality; this contrasts with the  
41  
42 286 survival analyses by Cox regression (Table 4). In addition, by pathway analysis, each of  
43  
44 287 physical functioning and general health are themselves important in the prediction of  
45  
46 288 mortality risk in men. It remains conceivable that the dietary quality that men achieve,  
47  
48 289 irrespective of eating-with-others, plays a role in each of physical functioning and general  
49  
50 290 health, which is evident in this population.<sup>10 20</sup>  
51  
52  
53

54  
55 291 In the case of women, dietary quality directly and favourably predicts survival, but this  
56  
57 292 connection is not found to be dependent on eating-with-others. Perhaps women can achieve  
58  
59  
60



1  
2  
3  
4 293 the biomedical benefit of survival through diet without the need for its social function. In  
5  
6 294 addition, women have a more favourable survival with better physical functioning. Somewhat  
7  
8 295 surprisingly, better mental health is unfavourably associated with survival, although this is  
9  
10 296 weakly significant. It is possible that confounders that have not been considered in this  
11  
12 297 pathway analysis might account for this mental health association with mortality in older  
13  
14 298 women. For example, in devoting themselves to the care of others, or in dealing successfully  
15  
16 299 with a relative socio-economic disadvantage in widowhood, a sense of wellbeing may obtain,  
17  
18 300 while health adversity supervenes.  
19  
20  
21  
22 301

## 23 302 **Limitations**

24  
25  
26 303 There are some limitations to this study. First, since the study participants were elderly, it can  
27  
28 304 be expected that a change in their eating arrangements would take place through time as  
29  
30 305 family and health circumstances change. Given that this is a single point survey (1999-2000),  
31  
32 306 varied follow-up times may alter the findings. However, we have performed analyses with  
33  
34 307 several follow-up times (<2, <4, <6 and ≥6 years) or the exclusion of events in the first and  
35  
36 308 second years (data not shown). For men, the point estimates for HRs eating-with-others twice  
37  
38 309 a day are consistently <1.00. But for women, low HRs of 0.15 are seen for eating-with-others  
39  
40 310 once a day in the first two years of observation, although not beyond. This does not change  
41  
42 311 our conclusions with the 10-year survival analysis. Second, the association may be affected by  
43  
44 312 the duration of time spent eating alone or eating-with-others, which was not considered. Third,  
45  
46 313 in Taiwanese society, older people are more likely to live with and depend on their families, so  
47  
48 314 the culturally specific nature of this study may limit its applicability elsewhere. The study  
49  
50 315 should be considered within a Taiwanese (of perhaps a broader Asian) context. As with cohort  
51  
52 316 studies in general, there may have been confounders not considered which might have  
53  
54 317 explained the associations presented. The study itself, however, has sought to consider the  
55  
56  
57  
58  
59  
60

1  
2  
3  
4 318 circumstances of eating which are usually neglected in the exploration of food and nutrient  
5  
6 319 health relationships. The pathway analyses are an attempt to encompass more of the  
7  
8 320 explanatory models for these relationships by way of inclusion of physical, mental and general  
9  
10 321 health. The gender differences which are now recognised here and in other reports for the  
11  
12 322 respective health roles of dietary quality on the one hand, and with whom the food is consumed  
13  
14 323 on the other, are a challenge to more gender comprehensive public health policy.  
15  
16  
17  
18 324

## 19 20 325 **Conclusions**

21  
22 326 Eating socially may benefit survival in elderly men through the adjunct of dietary quality; it is  
23  
24 327 also positively associated with men's mental health. For women, dietary quality is associated  
25  
26 328 with survival advantage which is not apparently dependent on eating-with-others. The relative  
27  
28 329 gender advantage in longevity that women have in this population is not adequately explained  
29  
30 330 in the present study, except that they are likely to be the ones who eat with men who benefit  
31  
32 331 from this social role of food. Thus, for men and women, the provision of a healthy social  
33  
34 332 environment which increases social interactions should improve health outcomes.  
35  
36  
37  
38 333

## 39 40 334 **ACKNOWLEDGMENT**

41  
42 335 The Elderly Nutrition and Health Survey (NAHSIT Elderly) in Taiwan 1997–2002 project  
43  
44 336 was conducted by the Institute of Biomedical Sciences of Academia Sinica and the Research  
45  
46 337 Center for the Humanities and Social Sciences, Center for Survey Research, Academia Sinica,  
47  
48 338 directed by Wen-Harn Pan and Su-Hao Tu, and sponsored by the Taiwan Department of Health.

49  
50 339 This study is based in part on data from Department of Health and managed by the National  
51  
52 340 Health Research Institutes. The interpretation and conclusions contained herein do not  
53  
54 341 represent those of Department of Health, or National Health Research Institutes.

55  
56 342 None of the authors has any conflicts of interest to declare.  
57  
58  
59  
60

1  
2  
3  
4 343  
5  
6

7 344 **AUTHOR'S CONTRIBUTION**

8  
9 345 YCH, HLC, MLW and MSL designed the study; YCH, HLC and YTCL performed statistical  
10  
11 346 analysis; YCH, MLW, YTCL, and MSL wrote the paper; MSL had primary responsibility for  
12  
13 347 the final content.  
14

15 348  
16

17  
18 349 **COMPETING INTERESTS**

19  
20 350 No author has any conflict of interest in regard to this paper.  
21

22 351  
23

24 352 **FOUNDING**

25  
26  
27 353 This work was supported by the Ministry of Science and Technology grant number

28  
29 354 MOST-103-2320-B-016-015-MY2, MOST105-2320-B-016 -008 and International Life

30  
31 355 Sciences Institute (ILSI) Taiwan.  
32

33 356  
34

35  
36 357 **DATA SHARING STATEMENT**

37  
38 358 No additional data are available.  
39

40 359  
41

42 360 **ETHICS**

43  
44 361 This project was approved by the Ethics Committees of the National Health Research Institute

45  
46 362 and Academia Sinica, Taiwan.  
47

48  
49 363  
50

51 364 **COPYRIGHT/LICENSE FOR PUBLISH**

52  
53 365 "I Meei-Shyuan Lee The Corresponding Author of this article contained within the original

54  
55 366 manuscript which includes any diagrams & photographs and any related or stand alone film  
56  
57  
58  
59  
60

1  
2  
3  
4 367 submitted (the Contribution”) has the right to grant on behalf of all authors and does grant on  
5  
6 368 behalf of all authors, a licence to the “BMJ Publishing Group Ltd” (“BMJ”) and its licensees,  
7  
8 369 to permit this Contribution (if accepted) to be published in any BMJ products and to exploit  
9  
10 370 all subsidiary rights, as set out in our licence set out at:  
11  
12 371 [http://group.bmj.com/products/journals/instructions-forauthors/wholly\\_owned\\_licence.pdf](http://group.bmj.com/products/journals/instructions-forauthors/wholly_owned_licence.pdf)  
13  
14  
15  
16  
17

## 18 373 REFERENCES

- 19 374 1. Rowe JW, Kahn RL. Successful aging. *Gerontologist* 1997;37:433–40.  
20  
21 375 2. Meiselman HL. Dimensions of the meal. *Journal of Foodservice* 2008;19:13–21. doi:  
22  
23 376 10.1111/j.1745-4506.2008.00076.x.  
24  
25 377 3. Administration for Community Living, US Department of Health and Human Services.  
26  
27 378 Nutrition Services (OAA Title IIIC) - Congregate Nutrition Services Washington, DC:  
28  
29 379 Administration for Community Living, US Department of Health and Human Services;  
30  
31 380 2016 [cited 2016 18th April]. Available from:  
32  
33 381 [http://www.aoa.gov/AoA\\_programs/HPW/Nutrition\\_Services/index.aspx#congregate](http://www.aoa.gov/AoA_programs/HPW/Nutrition_Services/index.aspx#congregate)  
34  
35 382 accessed 18th April 2016.  
36  
37 383 4. Kuroda A, Tanaka T, Hirano H, *et al.* Eating alone as social disengagement is strongly  
38  
39 384 associated with depressive symptoms in Japanese community-dwelling older adults. *J*  
40  
41 385 *Am Med Dir Assoc* 2015;16:578–85. doi: 10.1016/j.jamda.2015.01.078.  
42  
43 386 5. Tani Y, Sasaki Y, Haseda M, *et al.* Eating alone and depression in older men and women  
44  
45 387 by cohabitation status: The JAGES longitudinal survey. *Age Ageing* 2015;44:1019-26.  
46  
47 388 doi: 10.1093/ageing/afv145.  
48  
49 389 6. Wang X, Shen W, Wang C, *et al.* Association between eating alone and depressive  
50  
51 390 symptom in elders: a cross-sectional study. *BMC Geriatr* 2016;16:19. doi:  
52  
53 391 10.1186/s12877-016-0197-2.  
54  
55  
56  
57  
58  
59  
60

- 1  
2  
3 392 7. Kimura Y, Wada T, Okumiya K, *et al.* Eating alone among community-dwelling Japanese  
4  
5 393 elderly: association with depression and food diversity. *J Nutr Health Aging*  
6  
7 394 2012;16:728–31. doi: 10.1007/s12603-012-0067-3.  
8  
9  
10 395 8. Nijs KA, de Graaf C, Siebelink E, *et al.* Effect of family-style meals on energy intake and  
11  
12 396 risk of malnutrition in dutch nursing home residents: a randomized controlled trial. *J*  
13  
14 397 *Gerontol A Biol Sci Med Sci* 2006;61:935–42.  
15  
16 398 9. Tani Y, Kondo N, Takagi D, *et al.* Combined effects of eating alone and living alone on  
17  
18 399 unhealthy dietary behaviors, obesity and underweight in older Japanese adults: Results  
19  
20 400 of the JAGES. *Appetite* 2015;95:1–8. doi: 10.1016/j.appet.2015.06.005.  
21  
22  
23 401 10. Lee MS, Huang YC, Su HH, *et al.* A simple food quality index predicts mortality in  
24  
25 402 elderly Taiwanese. *J Nutr Health Aging* 2011;15:815–21.  
26  
27 403 11. Schoevers RA, Geerlings MI, Beekman AT, *et al.* Association of depression and gender  
28  
29 404 with mortality in old age. Results from the Amsterdam Study of the Elderly (AMSTEL).  
30  
31 405 *Br J Psychiatry* 2000;177:336–42.  
32  
33  
34 406 12. Clausen T, Wilson AO, Molebatsi RM, *et al.* Diminished mental- and physical function  
35  
36 407 and lack of social support are associated with shorter survival in community dwelling  
37  
38 408 older persons of Botswana. *BMC Public Health* 2007;7:144. doi:  
39  
40 409 10.1186/1471-2458-7-144.  
41  
42  
43 410 13. Sahyoun NR, Jacques PF, Dallal GE, *et al.* Nutrition Screening Initiative Checklist may  
44  
45 411 be a better awareness/educational tool than a screening one. *J Am Diet Assoc*  
46  
47 412 1997;97:760–4. doi: 10.1016/s0002-8223(97)00188-0.  
48  
49  
50 413 14. Ek S. Gender differences in health information behaviour: a Finnish population-based  
51  
52 414 survey. *Health Promot Int* 2015;30:736–45. doi: 10.1093/heapro/dat063.  
53  
54 415 15. Redondo-Sendino A, Guallar-Castillon P, Banegas JR, *et al.* Gender differences in the  
55  
56 416 utilization of health-care services among the older adult population of Spain. *BMC*

- 1  
2  
3 417 *Public Health* 2006;6:155. doi: 10.1186/1471-2458-6-155.
- 4  
5 418 16. Umberson D, Wortman CB, Kessler RC. Widowhood and depression: explaining  
6  
7 419 long-term gender differences in vulnerability. *J Health Soc Behav* 1992;33:10–24.
- 8  
9 420 17. Wu SJ, Chang YH, Wei IL, *et al.* Intake levels and major food sources of energy and  
10  
11 421 nutrients in the Taiwanese elderly. *Asia Pac J Clin Nutr* 2005;14:211–20.
- 12  
13 422 18. Cheng SL. Eating-with-others and the health of older people. School of Public Health.  
14  
15 423 National Defense Medical Center, 2014.
- 16  
17 424 19. Huang YC, Lee MS, Pan WH, *et al.* Validation of a simplified food frequency  
18  
19 425 questionnaire as used in the Nutrition and Health Survey in Taiwan (NAHSIT) for the  
20  
21 426 elderly. *Asia Pac J Clin Nutr* 2011;20:134–40.
- 22  
23 427 20. Lee MS, Chen RCY, Chang YH, *et al.* Physical function mitigates the adverse effects of  
24  
25 428 being thin on mortality in a freeliving older Taiwanese cohort. *J Nutr Health Aging*  
26  
27 429 2012;16:766–83.
- 28  
29 430 21. Chuang S, Chang H, Lee M, *et al.* Skeletal muscle mass and risk of death in an elderly  
30  
31 431 population. *Nutr, Metab Cardiovasc Di* 2014;24:784–91.
- 32  
33 432 22. Charlson ME, Pompei P, Ales KL, *et al.* A new method of classifying prognostic  
34  
35 433 comorbidity in longitudinal studies. Development and validation. *J Chronic Dis*  
36  
37 434 1987;40:373–83.
- 38  
39 435 23. Chen RC, Chang YH, Lee MS, *et al.* Dietary quality may enhance survival related to  
40  
41 436 cognitive impairment in Taiwanese elderly. *Food Nutr Res* 2011;55 doi:  
42  
43 437 10.3402/fnr.v55i0.7387.
- 44  
45 438 24. Gamborg M, Jensen GB, Sorensen TI, *et al.* Dynamic path analysis in life-course  
46  
47 439 epidemiology. *Am J Epidemiol* 2011;173:1131–9. doi: 10.1093/aje/kwq502.
- 48  
49 440 25. Locher JL, Robinson CO, Roth DL, *et al.* The effect of the presence of others on caloric  
50  
51 441 intake in homebound older adults. *J Gerontol A Biol Sci Med Sci* 2005;60:1475-8.
- 52  
53  
54  
55  
56  
57  
58  
59  
60

1  
2  
3  
4  
5  
6  
7  
8  
9  
10  
11  
12  
13  
14  
15  
16  
17  
18  
19  
20  
21  
22  
23  
24  
25  
26  
27  
28  
29  
30  
31  
32  
33  
34  
35  
36  
37  
38  
39  
40  
41  
42  
43  
44  
45  
46  
47  
48  
49  
50  
51  
52  
53  
54  
55  
56  
57  
58  
59  
60

- 442 26. Trichopoulou A, Kouris-Blazos A, Wahlqvist ML, *et al.* Diet and overall survival in  
443 elderly people. *BMJ* 1995;311:1457–60.
- 444 27. Davis MA, Randall E, Forthofer RN, *et al.* Living arrangements and dietary patterns of  
445 older adults in the United States. *J Gerontol* 1985;40:434-42.
- 446 28. Chen RC, Lee MS, Chang YH, *et al.* Cooking frequency may enhance survival in  
447 Taiwanese elderly. *Public Health Nutr* 2012;15:1142–9. doi:  
448 10.1017/s136898001200136x.
- 449 29. Ng TP, Jin A, Feng L, *et al.* Mortality of older persons living alone: Singapore  
450 Longitudinal Ageing Studies. *BMC Geriatr* 2015;15:126. doi:  
451 10.1186/s12877-015-0128-7.
- 452 30. Bowling A. Mortality after bereavement: a review of the literature on survival periods and  
453 factors affecting survival. *Soc Sci Med* 1987;24:117–24.
- 454
- 455

1  
2  
3 456 **LEGEND**

4  
5 457 Figure 1. Gender-specific pathway analysis for the associations of eating-with-others and  
6  
7 458 all-cause mortality. All values are presented as  $\beta$  coefficients with their p values. (A) men; (B)  
8  
9 459 women.  
10

11 460  
12  
13  
14  
15  
16  
17  
18  
19  
20  
21  
22  
23  
24  
25  
26  
27  
28  
29  
30  
31  
32  
33  
34  
35  
36  
37  
38  
39  
40  
41  
42  
43  
44  
45  
46  
47  
48  
49  
50  
51  
52  
53  
54  
55  
56  
57  
58  
59  
60

For peer review only



Table 1. The baseline characteristics by daily frequency for eating-with-others

| Variables                            | Daily frequency for eating-with-others |           |           |           |           |         |           |           |           |           |           |         |
|--------------------------------------|----------------------------------------|-----------|-----------|-----------|-----------|---------|-----------|-----------|-----------|-----------|-----------|---------|
|                                      | Men                                    |           |           |           |           |         | Women     |           |           |           |           |         |
|                                      | Total                                  | 0         | 1         | 2         | 3         | p value | Total     | 0         | 1         | 2         | 3         | p value |
| N                                    |                                        | 142       | 57        | 126       | 630       |         |           | 174       | 79        | 140       | 546       |         |
| %                                    |                                        | 14.3      | 6.96      | 15.6      | 63.1      |         |           | 17.8      | 10.2      | 15.7      | 56.4      |         |
| Median of follow-up (yrs)            |                                        | 8.17      | 8.28      | 8.76      | 8.67      |         |           | 8.55      | 8.89      | 8.75      | 8.74      |         |
| Age at baseline (yrs)                | 72.9±0.33                              | 74.9±0.65 | 71.8±0.74 | 72.4±0.73 | 72.7±0.44 | 0.042   | 73.4±0.44 | 75.3±0.76 | 72.9±0.65 | 72.9±0.88 | 73.0±0.39 | 0.020   |
| Education                            |                                        |           |           |           |           | <0.0001 |           |           |           |           |           | 0.963   |
| Illiterate                           | 18.8                                   | 24.2      | 16.7      | 8.8       | 20.3      |         | 56.0      | 57.5      | 55.6      | 52.3      | 56.6      |         |
| Some up to primary school            | 46.6                                   | 52.3      | 43.5      | 48.4      | 45.2      |         | 32.3      | 32.5      | 32.0      | 33.8      | 31.9      |         |
| High school and above                | 34.7                                   | 23.5      | 39.9      | 42.8      | 34.5      |         | 11.7      | 10.0      | 12.4      | 13.8      | 11.5      |         |
| Marital status                       |                                        |           |           |           |           | <0.0001 |           |           |           |           |           | <0.0001 |
| Married                              | 78.6                                   | 36.1      | 48.2      | 75.0      | 92.5      |         | 49.48     | 15.5      | 19.6      | 37.8      | 68.8      |         |
| Bereaved                             | 14.3                                   | 37.8      | 38.8      | 17.5      | 5.43      |         | 48.12     | 80.6      | 71.1      | 60.7      | 30.3      |         |
| Others                               | 7.15                                   | 26.1      | 13.0      | 7.55      | 2.11      |         | 2.40      | 3.87      | 9.32      | 1.56      | 0.95      |         |
| Live alone                           | 13.7                                   | 60.4      | 0.00      | 9.67      | 1.47      | <0.0001 | 10.3      | 49.4      | 6.43      | 2.91      | 0.42      | <0.0001 |
| Whether enough money                 |                                        |           |           |           |           | 0.030   |           |           |           |           |           | 0.001   |
| More than enough                     | 78.4                                   | 71.8      | 79.9      | 85.8      | 77.8      |         | 75.0      | 64.1      | 63.1      | 78.3      | 79.5      |         |
| Just enough                          | 19.2                                   | 21.7      | 20.2      | 13.0      | 20.1      |         | 21.0      | 28.7      | 28.8      | 21.0      | 17.2      |         |
| Not enough                           | 2.46                                   | 6.52      | 0.00      | 1.26      | 2.14      |         | 4.01      | 7.23      | 8.13      | 0.70      | 3.25      |         |
| Smoker                               | 65.7                                   | 70.5      | 82.0      | 63.9      | 63.2      | 0.078   | 4.92      | 2.44      | 2.55      | 5.34      | 6.01      | 0.171   |
| Appetite status                      |                                        |           |           |           |           | 0.232   |           |           |           |           |           | 0.112   |
| Good                                 | 38.5                                   | 33.0      | 45.0      | 36.6      | 39.4      |         | 30.4      | 24.9      | 42.9      | 31.7      | 29.5      |         |
| Fair                                 | 55.5                                   | 62.5      | 41.5      | 59.4      | 54.5      |         | 59.4      | 57.2      | 48.8      | 61.5      | 61.4      |         |
| Poor                                 | 6.07                                   | 4.54      | 13.5      | 4.09      | 6.08      |         | 10.2      | 17.9      | 8.34      | 6.87      | 9.14      |         |
| Body mass index (kg/m <sup>2</sup> ) | 23.3±0.15                              | 22.9±0.46 | 23.2±0.64 | 23.2±0.33 | 23.3±0.17 | 0.738   | 23.9±0.25 | 23.3±0.56 | 25.1±0.43 | 24.5±0.50 | 23.8±0.28 | 0.0002  |
| < 18.5                               | 7.07                                   | 11.2      | 10.4      | 7.53      | 5.66      |         | 7.01      | 8.07      | 0.00      | 3.83      | 8.72      |         |
| 18.5–23.9                            | 52.5                                   | 54.1      | 53.4      | 50.6      | 52.6      |         | 44.0      | 51.0      | 39.6      | 40.9      | 43.6      |         |

|                                                 |           |           |           |           |           |         |           |           |           |           |           |         |
|-------------------------------------------------|-----------|-----------|-----------|-----------|-----------|---------|-----------|-----------|-----------|-----------|-----------|---------|
| 24.0–26.9                                       | 28.0      | 19.0      | 19.9      | 34.0      | 29.2      |         | 27.8      | 24.7      | 34.1      | 25.3      | 28.1      |         |
| ≥ 27.0                                          | 12.5      | 15.7      | 16.3      | 7.91      | 12.6      |         | 21.3      | 16.3      | 26.3      | 30.0      | 19.6      |         |
| Physical activity (MET/day)                     |           |           |           |           |           | 0.173   |           |           |           |           |           | 0.017   |
| <1.5                                            | 51.6      | 45.3      | 44.0      | 51.2      | 54.0      |         | 61.1      | 60.5      | 51.0      | 52.9      | 65.4      |         |
| 1.5–2.9                                         | 11.3      | 14.3      | 17.9      | 14.2      | 9.17      |         | 11.8      | 14.3      | 6.16      | 14.0      | 11.4      |         |
| ≥3                                              | 37.1      | 40.4      | 38.1      | 34.7      | 36.8      |         | 27.1      | 25.2      | 42.8      | 33.1      | 23.2      |         |
| Shopping                                        |           |           |           |           |           | 0.239   |           |           |           |           |           | 0.037   |
| <1/wk                                           | 43.8      | 34.2      | 44.5      | 45.9      | 45.5      |         | 54.9      | 65.3      | 46.6      | 50.9      | 54.3      |         |
| 1/wk                                            | 12.7      | 13.5      | 15.2      | 13.0      | 12.2      |         | 13.6      | 10.2      | 14.8      | 18.4      | 13.1      |         |
| 1–2/wk                                          | 23.3      | 24.7      | 21.0      | 19.6      | 24.2      |         | 19.8      | 14.9      | 24.7      | 22.0      | 19.8      |         |
| Everyday                                        | 20.2      | 27.6      | 19.3      | 21.6      | 18.3      |         | 11.7      | 9.63      | 13.9      | 8.74      | 12.9      |         |
| Current cooking activity                        |           |           |           |           |           | <0.0001 |           |           |           |           |           | 0.004   |
| Never                                           | 58.4      | 33.2      | 44.1      | 58.1      | 65.8      |         | 26.8      | 24.1      | 12.1      | 31.5      | 29.1      |         |
| Sometimes                                       | 20.3      | 13.1      | 19.2      | 24.8      | 20.8      |         | 13.2      | 5.10      | 9.1       | 16.0      | 15.8      |         |
| Often                                           | 6.83      | 6.63      | 11.4      | 9.63      | 5.66      |         | 10.5      | 6.94      | 20.0      | 12.6      | 9.23      |         |
| Usually                                         | 14.5      | 47.0      | 25.2      | 7.46      | 7.69      |         | 49.5      | 63.9      | 58.8      | 39.9      | 45.9      |         |
| Activities of daily living                      | 0.33±0.05 | 0.52±0.18 | 0.19±0.15 | 0.07±0.05 | 0.36±0.07 | 0.004   | 0.57±0.08 | 1.18±0.34 | 0.27±0.13 | 0.28±0.17 | 0.50±0.10 | 0.088   |
| Skeletal muscle mass index (kg/m <sup>2</sup> ) | 12.3±0.12 | 12.0±0.27 | 12.2±0.29 | 12.0±0.20 | 12.5±0.13 | 0.149   | 9.28±0.12 | 9.14±0.22 | 9.52±0.20 | 9.32±0.17 | 9.29±0.15 | 0.213   |
| Charlson comorbidity index                      | 4.71±0.20 | 5.20±0.48 | 4.22±0.39 | 4.85±0.61 | 4.62±0.20 | 0.365   | 4.77±0.21 | 5.06±0.51 | 4.74±0.59 | 4.21±0.29 | 4.84±0.24 | 0.142   |
| Self-perceived health status                    |           |           |           |           |           | 0.400   |           |           |           |           |           | <0.0001 |
| Excellent                                       | 4.55      | 7.12      | 7.46      | 1.23      | 4.47      |         | 2.58      | 2.88      | 0         | 3.14      | 2.80      |         |
| Very good                                       | 19.9      | 16.5      | 13.8      | 29.9      | 18.9      |         | 15.7      | 10.7      | 24.3      | 14.1      | 16.0      |         |
| Good                                            | 21.4      | 25.8      | 19.0      | 17.3      | 21.8      |         | 16.1      | 11.8      | 9.85      | 17.7      | 18.2      |         |
| Fair                                            | 41.1      | 38.2      | 40.3      | 40.7      | 41.9      |         | 48.3      | 47.9      | 56.7      | 50.4      | 46.2      |         |
| Poor                                            | 13.1      | 12.4      | 19.5      | 10.9      | 13.1      |         | 17.4      | 26.7      | 9.25      | 14.7      | 16.8      |         |
| Cognitive impairment                            | 8.81      | 12.6      | 1.82      | 3.10      | 10.2      | 0.005   | 27.4      | 30.9      | 25.9      | 30.4      | 25.8      | 0.751   |

All data weighted for unequal probability of sampling design by SUDAAN. Categorical variables are presented as n (%), and continuous variables are presented as mean±SE.

ANOVA and chi-square were used for continuous and categories variables to test difference between the groups by gender.

461

Table 2. Food, nutrient intakes and daily frequency of eating-with-others by gender

|                                                               | Daily frequency for eating-with-others |           |           |           |         |           |           |           |           |         |
|---------------------------------------------------------------|----------------------------------------|-----------|-----------|-----------|---------|-----------|-----------|-----------|-----------|---------|
|                                                               | Men                                    |           |           |           |         | Women     |           |           |           |         |
|                                                               | 0                                      | 1         | 2         | 3         | p value | 0         | 1         | 2         | 3         | p value |
| Food preparation, %                                           |                                        |           |           |           |         |           |           |           |           |         |
| Skipping meals                                                | 11.2                                   | 16.5      | 5.75      | 2.96      | 0.008   | 6.54      | 8.45      | 4.76      | 4.27      | 0.370   |
| Who prepared breakfast?                                       |                                        |           |           |           | <0.0001 |           |           |           |           | 0.003   |
| Self                                                          | 57.6                                   | 45.7      | 37.0      | 12.7      |         | 74.0      | 76.2      | 61.3      | 57.2      |         |
| Others                                                        | 28.6                                   | 36.4      | 56.1      | 85.8      |         | 23.9      | 20.7      | 36.1      | 41.5      |         |
| Eating out                                                    | 13.8                                   | 17.9      | 6.96      | 1.52      |         | 2.14      | 3.12      | 2.62      | 1.35      |         |
| Who prepared lunch?                                           |                                        |           |           |           | <0.0001 |           |           |           |           | 0.0001  |
| Self                                                          | 59.0                                   | 40.8      | 11.3      | 9.07      |         | 68.1      | 74.2      | 48.0      | 53.1      |         |
| Others                                                        | 31.3                                   | 34.9      | 85.0      | 89.0      |         | 26.3      | 18.1      | 50.0      | 45.2      |         |
| Eating out                                                    | 9.72                                   | 24.3      | 3.66      | 1.90      |         | 5.59      | 7.73      | 1.96      | 1.63      |         |
| Who prepared dinner?                                          |                                        |           |           |           | <0.0001 |           |           |           |           | 0.009   |
| Self                                                          | 60.0                                   | 25.0      | 6.20      | 8.52      |         | 67.7      | 60.1      | 44.6      | 51.4      |         |
| Others                                                        | 32.9                                   | 74.0      | 92.1      | 90.7      |         | 30.2      | 39.9      | 55.4      | 48.1      |         |
| Eating out                                                    | 7.05                                   | 1.03      | 1.73      | 0.76      |         | 2.11      | 0.00      | 0.00      | 0.51      |         |
| If you need to prepare meals for yourself, who gets the food? |                                        |           |           |           | <0.0001 |           |           |           |           | 0.118   |
| Never prepare                                                 | 6.21                                   | 15.8      | 9.38      | 9.32      |         | 8.37      | 1.67      | 5.24      | 6.60      |         |
| Self                                                          | 61.2                                   | 23.4      | 21.2      | 18.6      |         | 60.2      | 67.4      | 48.2      | 48.4      |         |
| Others                                                        | 32.6                                   | 60.8      | 69.5      | 72.1      |         | 31.4      | 31.0      | 46.6      | 45.0      |         |
| Dietary diversity score, mean±SE                              | 4.27±0.11                              | 4.13±0.17 | 4.57±0.11 | 4.61±0.06 | 0.003   | 4.28±0.13 | 4.32±0.14 | 4.69±0.10 | 4.46±0.06 | 0.009   |
| ≤3 (%)                                                        | 24.1                                   | 22.1      | 12.2      | 12.1      | 0.010   | 30.2      | 20.7      | 8.05      | 17.5      | 0.001   |
| 4 (%)                                                         | 30.0                                   | 41.4      | 30.2      | 32.4      |         | 24.1      | 31.2      | 31.5      | 31.3      |         |
| 5 (%)                                                         | 35.4                                   | 28.4      | 39.6      | 35.8      |         | 25.1      | 31.7      | 42.8      | 34.8      |         |

| 6 (%)                                            | 10.8      | 8.13      | 18.0      | 19.7      |       | 20.7      | 16.4      | 17.6      | 16.4      |       |
|--------------------------------------------------|-----------|-----------|-----------|-----------|-------|-----------|-----------|-----------|-----------|-------|
| Food intake other than cereal (times/d), mean±SE |           |           |           |           |       |           |           |           |           |       |
| Dairy                                            | 0.57±0.07 | 0.40±0.09 | 0.65±0.08 | 0.62±0.05 | 0.116 | 0.80±0.08 | 0.89±0.14 | 0.74±0.09 | 0.72±0.05 | 0.480 |
| Meat                                             | 1.02±0.09 | 1.98±0.08 | 1.59±0.19 | 1.30±0.07 | 0.001 | 0.81±0.15 | 0.86±0.16 | 1.20±0.16 | 1.13±0.08 | 0.017 |
| Seafood                                          | 0.86±0.18 | 0.93±0.12 | 1.08±0.12 | 0.99±0.08 | 0.524 | 0.70±0.10 | 0.92±0.12 | 0.91±0.09 | 0.99±0.07 | 0.026 |
| Egg                                              | 0.44±0.08 | 0.39±0.05 | 0.46±0.05 | 0.46±0.03 | 0.687 | 0.23±0.03 | 0.36±0.04 | 0.36±0.03 | 0.38±0.03 | 0.003 |
| Soy                                              | 0.48±0.09 | 0.43±0.06 | 0.47±0.06 | 0.45±0.04 | 0.824 | 0.39±0.06 | 0.50±0.10 | 0.61±0.07 | 0.51±0.05 | 0.063 |
| Vegetable                                        | 1.90±0.18 | 1.84±0.13 | 2.57±0.13 | 2.47±0.12 | 0.004 | 2.09±0.14 | 2.28±0.13 | 2.35±0.14 | 2.52±0.14 | 0.011 |
| Fruit                                            | 0.99±0.11 | 0.93±0.13 | 1.21±0.09 | 1.19±0.04 | 0.073 | 0.91±0.10 | 0.90±0.07 | 1.21±0.10 | 1.07±0.06 | 0.058 |
| Total energy intake (kcal), mean±SE              | 1833±100  | 1849±123  | 1871±118  | 1815±77.4 | 0.940 | 1327±92.6 | 1518±126  | 1500±58.7 | 1521±84.3 | 0.206 |
| Nutrient density (/1,000 kcal), mean±SE          |           |           |           |           |       |           |           |           |           |       |
| Carbohydrate (g)                                 | 132±4.79  | 137±5.21  | 139±2.58  | 139±2.71  | 0.438 | 155±3.55  | 143±5.63  | 144±3.31  | 144±1.82  | 0.028 |
| Dietary fiber (g)                                | 11.2±0.79 | 11.7±0.87 | 12.4±0.75 | 11.7±0.45 | 0.653 | 15.5±2.05 | 14.1±1.44 | 14.0±1.02 | 12.7±0.57 | 0.416 |
| Fat (g)                                          | 32.1±1.42 | 30.5±2.15 | 30.2±1.28 | 29.5±0.82 | 0.377 | 24.7±1.13 | 29.7±2.30 | 29.2±1.50 | 28.9±0.85 | 0.002 |
| Protein (g)                                      | 41.9±1.80 | 43.3±2.52 | 41.5±1.34 | 43.2±1.16 | 0.690 | 41.6±1.77 | 42.1±2.06 | 42.8±1.32 | 41.8±1.27 | 0.923 |
| Vitamin B-1 (mg)                                 | 0.63±0.06 | 0.78±0.07 | 0.69±0.04 | 0.70±0.03 | 0.645 | 0.71±0.08 | 0.69±0.05 | 0.76±0.07 | 0.66±0.03 | 0.449 |
| Vitamin B-2 (mg)                                 | 0.84±0.06 | 0.88±0.12 | 0.78±0.06 | 0.81±0.04 | 0.801 | 1.02±0.07 | 1.11±0.14 | 1.05±0.09 | 0.85±0.04 | 0.107 |
| Vitamin B-6 (mg)                                 | 0.73±0.07 | 0.82±0.09 | 0.75±0.05 | 0.72±0.03 | 0.586 | 0.65±0.05 | 0.81±0.08 | 0.73±0.03 | 0.71±0.03 | 0.421 |
| Vitamin C (mg)                                   | 92.5±12.2 | 88.4±12.8 | 87.5±8.69 | 90.6±6.18 | 0.984 | 110±9.32  | 103±11.5  | 131±20.0  | 105±7.72  | 0.597 |
| Calcium (mg)                                     | 382±26.2  | 338±41.7  | 336±21.0  | 365±16.3  | 0.353 | 536±43.0  | 455±42.4  | 483±41.7  | 432±19.8  | 0.166 |
| Magnesium (mg)                                   | 139±7.34  | 141±12.1  | 143±6.63  | 145±3.84  | 0.907 | 167±9.06  | 157±7.87  | 159±9.59  | 147±4.55  | 0.142 |

All data weighted for unequal probability of sampling design by SUDAAN.

ANOVA and chi-square were used for continuous and categories variables to test difference between the groups by gender.

462

Table 3. Health-related quality of life (SF-36) according to daily frequency eating-with-others by gender

|                                            | Daily frequency eating-with-others |           |           |           |         |           |           |           |           |         |
|--------------------------------------------|------------------------------------|-----------|-----------|-----------|---------|-----------|-----------|-----------|-----------|---------|
|                                            | Men                                |           |           |           |         | Women     |           |           |           |         |
|                                            | 0                                  | 1         | 2         | 3         | p value | 0         | 1         | 2         | 3         | p value |
| General health                             | 52.8±1.18                          | 52.0±1.49 | 52.9±1.10 | 51.5±0.50 | 0.538   | 47.1±0.99 | 48.6±1.23 | 49.7±1.24 | 49.0±0.84 | 0.211   |
| Mental health                              | 51.4±0.91                          | 49.3±1.88 | 52.3±1.13 | 52.5±0.50 | 0.222   | 47.8±1.30 | 47.3±1.45 | 48.8±1.27 | 49.2±1.02 | 0.542   |
| Physical functioning                       | 51.1±1.16                          | 50.4±1.26 | 53.3±0.68 | 51.5±0.65 | 0.044   | 45.2±0.96 | 50.7±0.97 | 48.2±1.03 | 47.0±0.64 | 0.002   |
| Body pain                                  | 51.2±1.20                          | 51.5±1.63 | 52.8±1.04 | 51.9±0.68 | 0.529   | 46.5±1.08 | 47.4±1.20 | 49.5±1.00 | 48.0±0.69 | 0.112   |
| Role limitations due to emotional problems | 50.0±1.19                          | 47.7±1.69 | 51.5±0.93 | 51.2±0.63 | 0.160   | 47.5±1.16 | 50.8±1.51 | 49.6±1.13 | 49.3±0.86 | 0.354   |
| Role limitations due to physical problems  | 50.2±1.36                          | 49.5±1.31 | 52.1±1.01 | 51.4±0.67 | 0.254   | 46.1±1.03 | 51.4±1.28 | 48.7±1.55 | 49.7±0.87 | 0.005   |
| Social function                            | 50.0±1.22                          | 49.4±1.71 | 51.9±0.99 | 50.9±0.67 | 0.262   | 48.2±1.17 | 48.6±1.31 | 50.0±1.31 | 49.0±0.71 | 0.698   |
| Vitality                                   | 51.0±1.32                          | 49.4±1.76 | 51.7±1.02 | 51.8±0.68 | 0.591   | 47.1±0.95 | 49.2±1.72 | 48.1±1.45 | 48.1±0.75 | 0.553   |

All data weighted for unequal probability of sampling design by SUDAAN.

ANOVA was used for continuous and categories variables to test difference between the groups by gender.

1  
2  
3  
4  
5  
6  
7  
8  
9  
10  
11  
12  
13  
14  
15  
16  
17  
18  
19  
20  
21  
22  
23  
24  
25  
26  
27  
28  
29  
30  
31  
32  
33  
34  
35  
36  
37  
38  
39  
40  
41  
42  
43  
44  
45  
46  
47  
48  
49

463

464

Table 4. Gender-specific hazard ratios (95% CI) of association between eating-with-others and risk of mortality in older adults

|                         | Daily frequency of eating-with-others |                     |                        |                       |        |                     |                     |                     |
|-------------------------|---------------------------------------|---------------------|------------------------|-----------------------|--------|---------------------|---------------------|---------------------|
|                         | Men                                   |                     |                        |                       | Women  |                     |                     |                     |
|                         | 0                                     | 1                   | 2                      | 3                     | 0      | 1                   | 2                   | 3                   |
| Deceased/survival,<br>n | 75/67                                 | 26/31               | 37/89                  | 248/382               | 60/114 | 20/59               | 36/104              | 196/350             |
| Crude model             | 1.00                                  | 0.90<br>(0.60–1.35) | 0.42***<br>(0.28–0.61) | 0.67**<br>(0.52–0.88) | 1.00   | 0.53<br>(0.27–1.05) | 0.68<br>(0.42–1.11) | 0.86<br>(0.64–1.16) |
| Model 1                 | 1.00                                  | 1.12<br>(0.71–1.78) | 0.48**<br>(0.31–0.74)  | 0.76<br>(0.57–1.03)   | 1.00   | 0.54<br>(0.24–1.23) | 0.89<br>(0.53–1.49) | 1.07<br>(0.77–1.49) |
| Model 2 <sup>†</sup>    | 1.00                                  | 0.76<br>(0.37–1.56) | 0.43**<br>(0.25–0.73)  | 0.63*<br>(0.41–0.98)  | 1.00   | 0.56<br>(0.29–1.07) | 0.68<br>(0.35–1.30) | 0.69<br>(0.39–1.21) |
| Model 3 <sup>†</sup>    | 1.00                                  | 0.78<br>(0.39–1.55) | 0.46**<br>(0.28–0.77)  | 0.66<br>(0.43–1.02)   | 1.00   | 0.54<br>(0.27–1.06) | 0.70<br>(0.36–1.36) | 0.72<br>(0.40–1.27) |

Data were weighted for unequal probability of sampling design by SUDAAN and estimated HR (95% CI) by using the Cox proportional-hazard model.

Model 1: adjusted for age

Model 2: adjusted for age, education (illiterate, primary school, high school and above), region (Hakka, mountains, Eastern Taiwan, Penghu, Northern Taiwan 1–3, Central Taiwan 1–3, Southern Taiwan 1–3), live alone (live alone, live with others), cook frequency (never, sometimes, often, frequently), marital status (married, bereaved, other), appetite status (good, fair, poor), dietary diversity score ( $\leq 3$ , 4, 5, 6), activities of daily living and body mass index ( $<18.5$ , 18.5–23.9, 24.0–26.9,  $\geq 27$  kg/m<sup>2</sup>)

Model 3: model 2 plus adjusted self-rate financial status (more than enough, just enough, not enough)

<sup>†</sup>Women were not adjusted for activities of daily living in the models since it is highly correlated with cooking frequency.

\*p<0.05; \*\*p<0.01; \*\*\*p<0.001

465

466

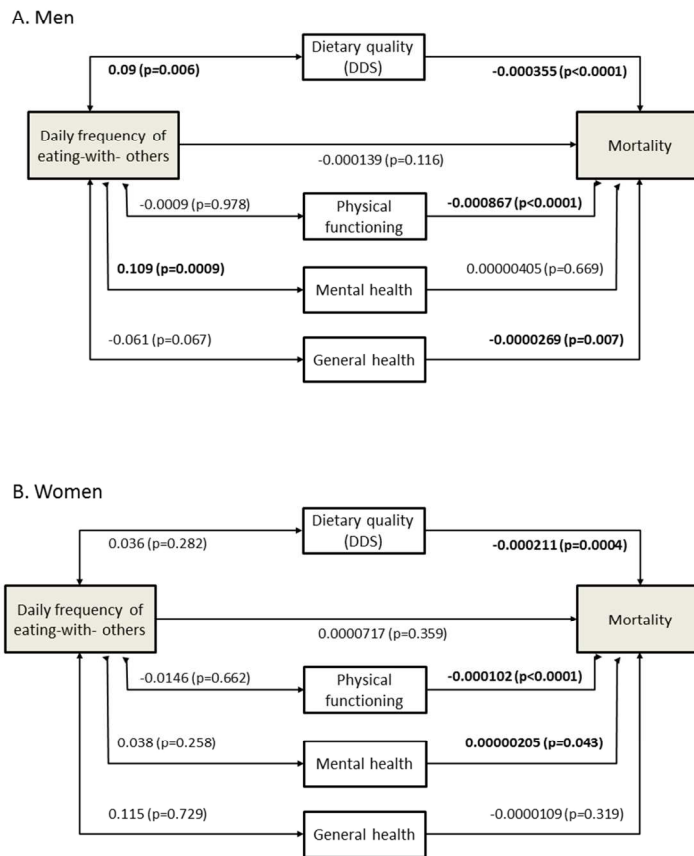

Figure 1. Gender-specific pathway analysis for the associations of eating-with-others and all-cause mortality. All values are presented as  $\beta$  coefficients with their p values. (A) men; (B) women.

297x420mm (300 x 300 DPI)

Supplementary table 1. Spearman rank correlation coefficients between daily frequency of eating with others and co-variables

|                                                | Spearman rank correlation coefficients |                       |
|------------------------------------------------|----------------------------------------|-----------------------|
|                                                | Men                                    | Women                 |
| Education – higher                             | 0.067 <sup>*</sup>                     | 0.037                 |
| Marital status – married                       | 0.522 <sup>***</sup>                   | 0.460 <sup>***</sup>  |
| Dietary diversity score – higher               | 0.092 <sup>**</sup>                    | 0.033                 |
| Body mass index – higher                       | 0.037                                  | 0.025                 |
| Age – older                                    | -0.092 <sup>**</sup>                   | -0.127 <sup>**</sup>  |
| Live alone                                     | -0.648 <sup>***</sup>                  | -0.592 <sup>***</sup> |
| Cooking frequency – more                       | -0.407 <sup>***</sup>                  | -0.157 <sup>***</sup> |
| Appetite status – poor                         | -0.035                                 | -0.01                 |
| Activities of daily living – more difficulties | -0.037                                 | -0.087 <sup>**</sup>  |
| Self-rate financial status – not enough        | -0.066 <sup>*</sup>                    | -0.124 <sup>**</sup>  |

\*p<0.05; \*\*p<0.001; \*\*\*p<0.0001



## STROBE Statement—checklist of items that should be included in reports of observational studies

|                              | Item No | Recommendation                                                                                                                                                                                                                                                                                                                                                                                                                                                         | Page      |
|------------------------------|---------|------------------------------------------------------------------------------------------------------------------------------------------------------------------------------------------------------------------------------------------------------------------------------------------------------------------------------------------------------------------------------------------------------------------------------------------------------------------------|-----------|
| <b>Title and abstract</b>    | 1       | (a) Indicate the study's design with a commonly used term in the title or the abstract                                                                                                                                                                                                                                                                                                                                                                                 | 1         |
|                              |         | (b) Provide in the abstract an informative and balanced summary of what was done and what was found                                                                                                                                                                                                                                                                                                                                                                    | 2         |
| <b>Introduction</b>          |         |                                                                                                                                                                                                                                                                                                                                                                                                                                                                        |           |
| Background/rationale         | 2       | Explain the scientific background and rationale for the investigation being reported                                                                                                                                                                                                                                                                                                                                                                                   | 4         |
| Objectives                   | 3       | State specific objectives, including any prespecified hypotheses                                                                                                                                                                                                                                                                                                                                                                                                       | 4-5       |
| <b>Methods</b>               |         |                                                                                                                                                                                                                                                                                                                                                                                                                                                                        |           |
| Study design                 | 4       | Present key elements of study design early in the paper                                                                                                                                                                                                                                                                                                                                                                                                                | 5-7       |
| Setting                      | 5       | Describe the setting, locations, and relevant dates, including periods of recruitment, exposure, follow-up, and data collection                                                                                                                                                                                                                                                                                                                                        | 5-7       |
| Participants                 | 6       | (a) <i>Cohort study</i> —Give the eligibility criteria, and the sources and methods of selection of participants. Describe methods of follow-up<br><i>Case-control study</i> —Give the eligibility criteria, and the sources and methods of case ascertainment and control selection. Give the rationale for the choice of cases and controls<br><i>Cross-sectional study</i> —Give the eligibility criteria, and the sources and methods of selection of participants | 5, 7      |
|                              |         | (b) <i>Cohort study</i> —For matched studies, give matching criteria and number of exposed and unexposed<br><i>Case-control study</i> —For matched studies, give matching criteria and the number of controls per case                                                                                                                                                                                                                                                 |           |
| Variables                    | 7       | Clearly define all outcomes, exposures, predictors, potential confounders, and effect modifiers. Give diagnostic criteria, if applicable                                                                                                                                                                                                                                                                                                                               | 5-7       |
| Data sources/<br>measurement | 8*      | For each variable of interest, give sources of data and details of methods of assessment (measurement). Describe comparability of assessment methods if there is more than one group                                                                                                                                                                                                                                                                                   | 5-7       |
| Bias                         | 9       | Describe any efforts to address potential sources of bias                                                                                                                                                                                                                                                                                                                                                                                                              | 13        |
| Study size                   | 10      | Explain how the study size was arrived at                                                                                                                                                                                                                                                                                                                                                                                                                              | N/A       |
| Quantitative variables       | 11      | Explain how quantitative variables were handled in the analyses. If applicable, describe which groupings were chosen and why                                                                                                                                                                                                                                                                                                                                           | 5,<br>6-7 |
| Statistical methods          | 12      | (a) Describe all statistical methods, including those used to control for confounding                                                                                                                                                                                                                                                                                                                                                                                  | 7-8       |
|                              |         | (b) Describe any methods used to examine subgroups and interactions                                                                                                                                                                                                                                                                                                                                                                                                    | 7         |
|                              |         | (c) Explain how missing data were addressed                                                                                                                                                                                                                                                                                                                                                                                                                            | 5         |
|                              |         | (d) <i>Cohort study</i> —If applicable, explain how loss to follow-up was addressed<br><i>Case-control study</i> —If applicable, explain how matching of cases and controls was addressed<br><i>Cross-sectional study</i> —If applicable, describe analytical methods taking account of sampling strategy                                                                                                                                                              | 5         |
|                              |         | (e) Describe any sensitivity analyses                                                                                                                                                                                                                                                                                                                                                                                                                                  | 13        |

Continued on next page

**Results**

|                  |     |                                                                                                                                                                                                              |                  |
|------------------|-----|--------------------------------------------------------------------------------------------------------------------------------------------------------------------------------------------------------------|------------------|
| Participants     | 13* | (a) Report numbers of individuals at each stage of study—eg numbers potentially eligible, examined for eligibility, confirmed eligible, included in the study, completing follow-up, and analysed            | 5                |
|                  |     | (b) Give reasons for non-participation at each stage                                                                                                                                                         | 5                |
|                  |     | (c) Consider use of a flow diagram                                                                                                                                                                           | N/A              |
| Descriptive data | 14* | (a) Give characteristics of study participants (eg demographic, clinical, social) and information on exposures and potential confounders                                                                     | 8-9<br>(Table 1) |
|                  |     | (b) Indicate number of participants with missing data for each variable of interest                                                                                                                          | 5                |
|                  |     | (c) <i>Cohort study</i> —Summarise follow-up time (eg, average and total amount)                                                                                                                             | Table 1          |
| Outcome data     | 15* | <i>Cohort study</i> —Report numbers of outcome events or summary measures over time                                                                                                                          | Table 4          |
|                  |     | <i>Case-control study</i> —Report numbers in each exposure category, or summary measures of exposure                                                                                                         |                  |
|                  |     | <i>Cross-sectional study</i> —Report numbers of outcome events or summary measures                                                                                                                           |                  |
| Main results     | 16  | (a) Give unadjusted estimates and, if applicable, confounder-adjusted estimates and their precision (eg, 95% confidence interval). Make clear which confounders were adjusted for and why they were included | 9<br>(Table 4)   |
|                  |     | (b) Report category boundaries when continuous variables were categorized                                                                                                                                    | 7                |
|                  |     | (c) If relevant, consider translating estimates of relative risk into absolute risk for a meaningful time period                                                                                             | N/A              |
| Other analyses   | 17  | Report other analyses done—eg analyses of subgroups and interactions, and sensitivity analyses                                                                                                               | 7                |

**Discussion**

|                  |    |                                                                                                                                                                            |    |
|------------------|----|----------------------------------------------------------------------------------------------------------------------------------------------------------------------------|----|
| Key results      | 18 | Summarise key results with reference to study objectives                                                                                                                   | 10 |
| Limitations      | 19 | Discuss limitations of the study, taking into account sources of potential bias or imprecision. Discuss both direction and magnitude of any potential bias                 | 13 |
| Interpretation   | 20 | Give a cautious overall interpretation of results considering objectives, limitations, multiplicity of analyses, results from similar studies, and other relevant evidence | 14 |
| Generalisability | 21 | Discuss the generalisability (external validity) of the study results                                                                                                      | 14 |

**Other information**

|         |    |                                                                                                                                                               |    |
|---------|----|---------------------------------------------------------------------------------------------------------------------------------------------------------------|----|
| Funding | 22 | Give the source of funding and the role of the funders for the present study and, if applicable, for the original study on which the present article is based | 15 |
|---------|----|---------------------------------------------------------------------------------------------------------------------------------------------------------------|----|

\*Give information separately for cases and controls in case-control studies and, if applicable, for exposed and unexposed groups in cohort and cross-sectional studies.

**Note:** An Explanation and Elaboration article discusses each checklist item and gives methodological background and published examples of transparent reporting. The STROBE checklist is best used in conjunction with this article (freely available on the Web sites of PLoS Medicine at <http://www.plosmedicine.org/>, Annals of Internal Medicine at <http://www.annals.org/>, and Epidemiology at <http://www.epidem.com/>). Information on the STROBE Initiative is available at [www.strobe-statement.org](http://www.strobe-statement.org).
