# Supplementary material for: Gender differences in longevity in free-living older adults who eat-with-others: a prospective study in Taiwan
Source: PubMed Central journal article supplement — BMJ Open. 2017 Sep 18;7(9):e016575. doi: 10.1136/bmjopen-2017-016575 (PMC5623554; doi:10.1136/bmjopen-2017-016575), 2017-09-18
Supplement: bmjopen-2017-016575supp001.pdf [file bmjopen-2017-016575supp001.pdf]

Supplementary table 1. Spearman rank correlation coefficients between daily frequency of eating with others and co-variables

|                                                | Spearman rank correlation coefficients |                       |
|------------------------------------------------|----------------------------------------|-----------------------|
|                                                | Men                                    | Women                 |
| Education – higher                             | 0.067 <sup>*</sup>                     | 0.037                 |
| Marital status – married                       | 0.522 <sup>***</sup>                   | 0.460 <sup>***</sup>  |
| Dietary diversity score – higher               | 0.092 <sup>**</sup>                    | 0.033                 |
| Body mass index – higher                       | 0.037                                  | 0.025                 |
| Age – older                                    | -0.092 <sup>**</sup>                   | -0.127 <sup>**</sup>  |
| Live alone                                     | -0.648 <sup>***</sup>                  | -0.592 <sup>***</sup> |
| Cooking frequency – more                       | -0.407 <sup>***</sup>                  | -0.157 <sup>***</sup> |
| Appetite status – poor                         | -0.035                                 | -0.01                 |
| Activities of daily living – more difficulties | -0.037                                 | -0.087 <sup>**</sup>  |
| Self-rate financial status – not enough        | -0.066 <sup>*</sup>                    | -0.124 <sup>**</sup>  |

\* p<0.05; \*\* p<0.001; \*\*\* p<0.0001
